# Supplementary material for: Microbiome Profiling by Illumina Sequencing of Combinatorial Sequence-Tagged PCR Products
Source: PubMed Central journal article supplement (PMC2964327; doi:10.1371/journal.pone.0015406), 2010-10-26

otu 0 0.2 4.3 2.4

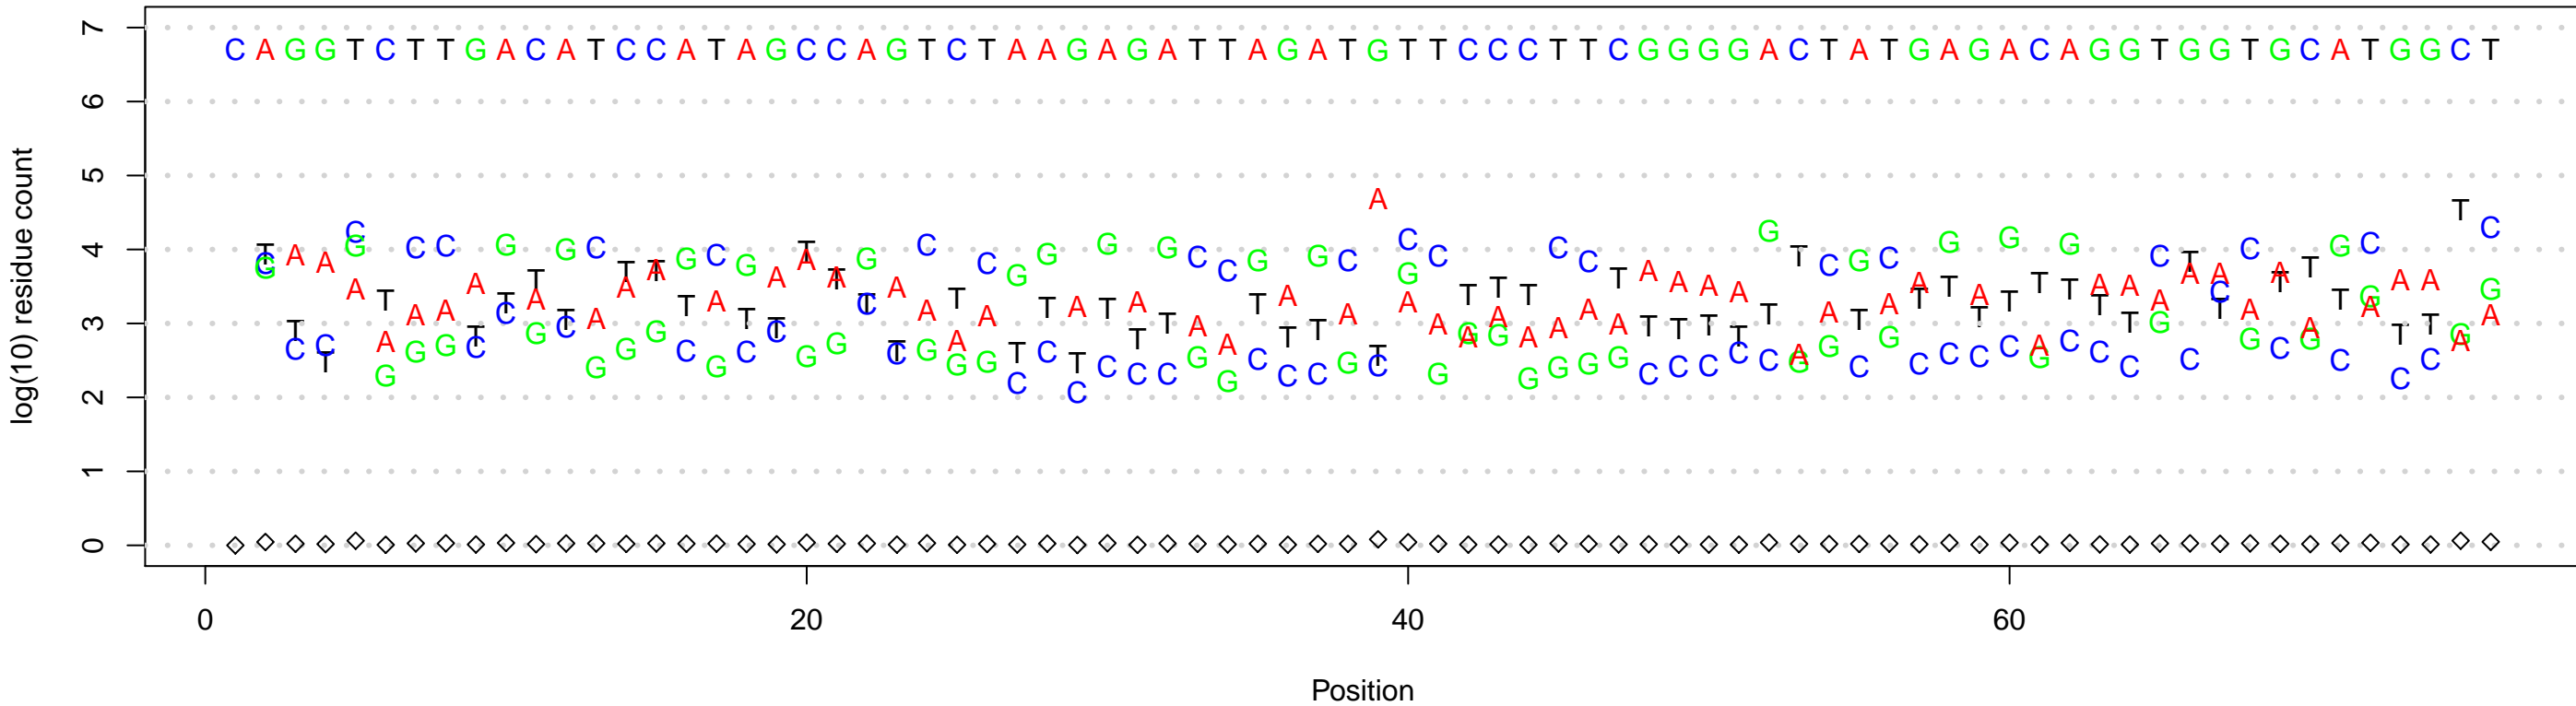

otu 1 3.1 6.3 16.0

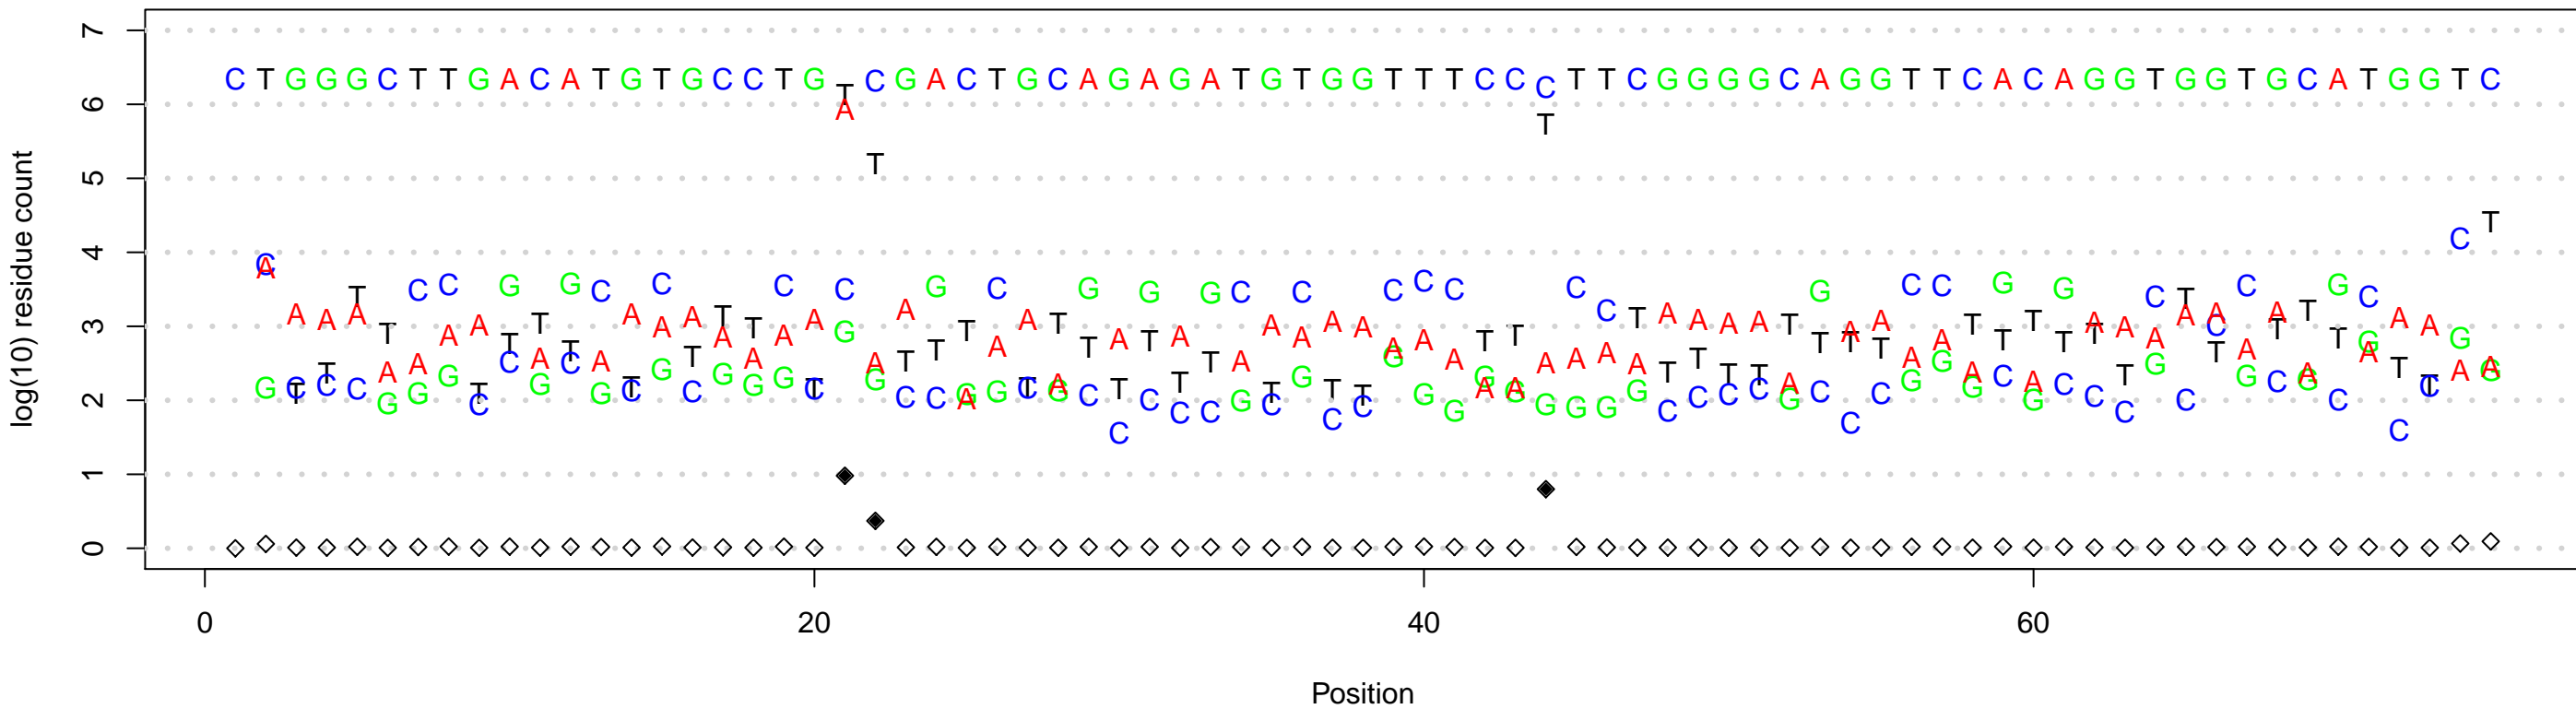

otu 2 0.4 7.5 11.3

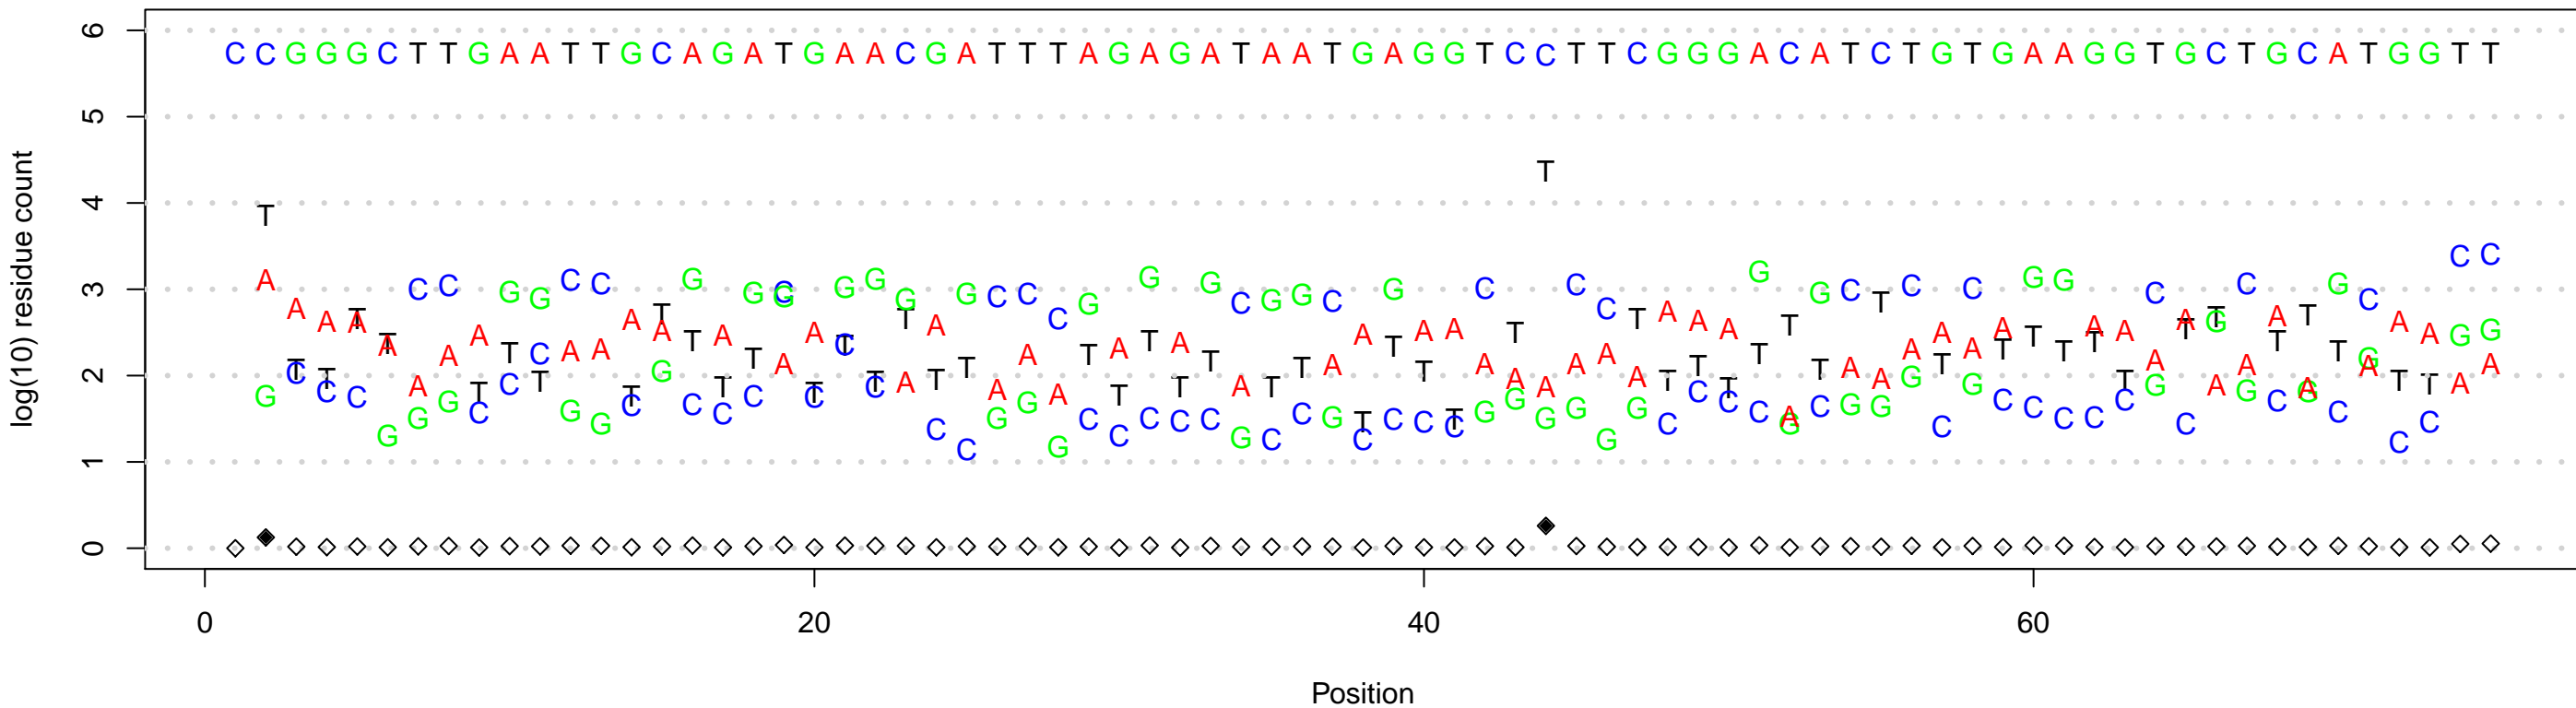

otu 3 0.3 6.0 3.5

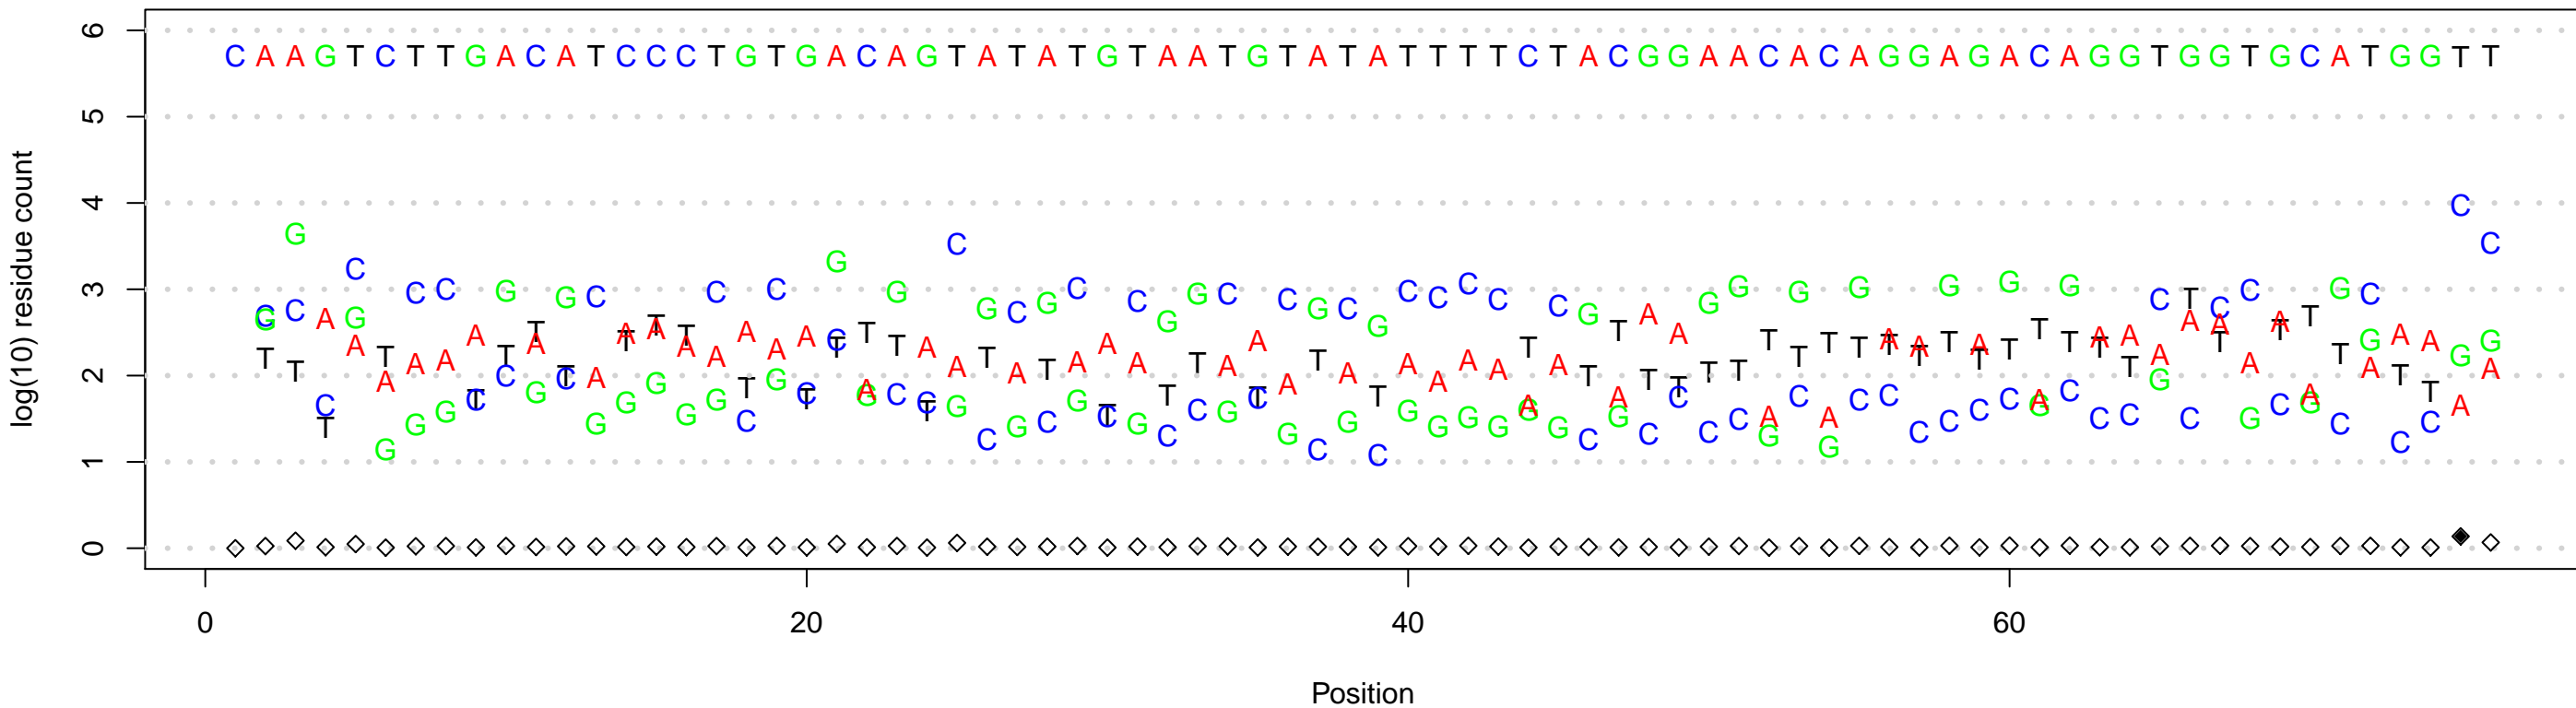

otu 4 0.2 3.7 2.3

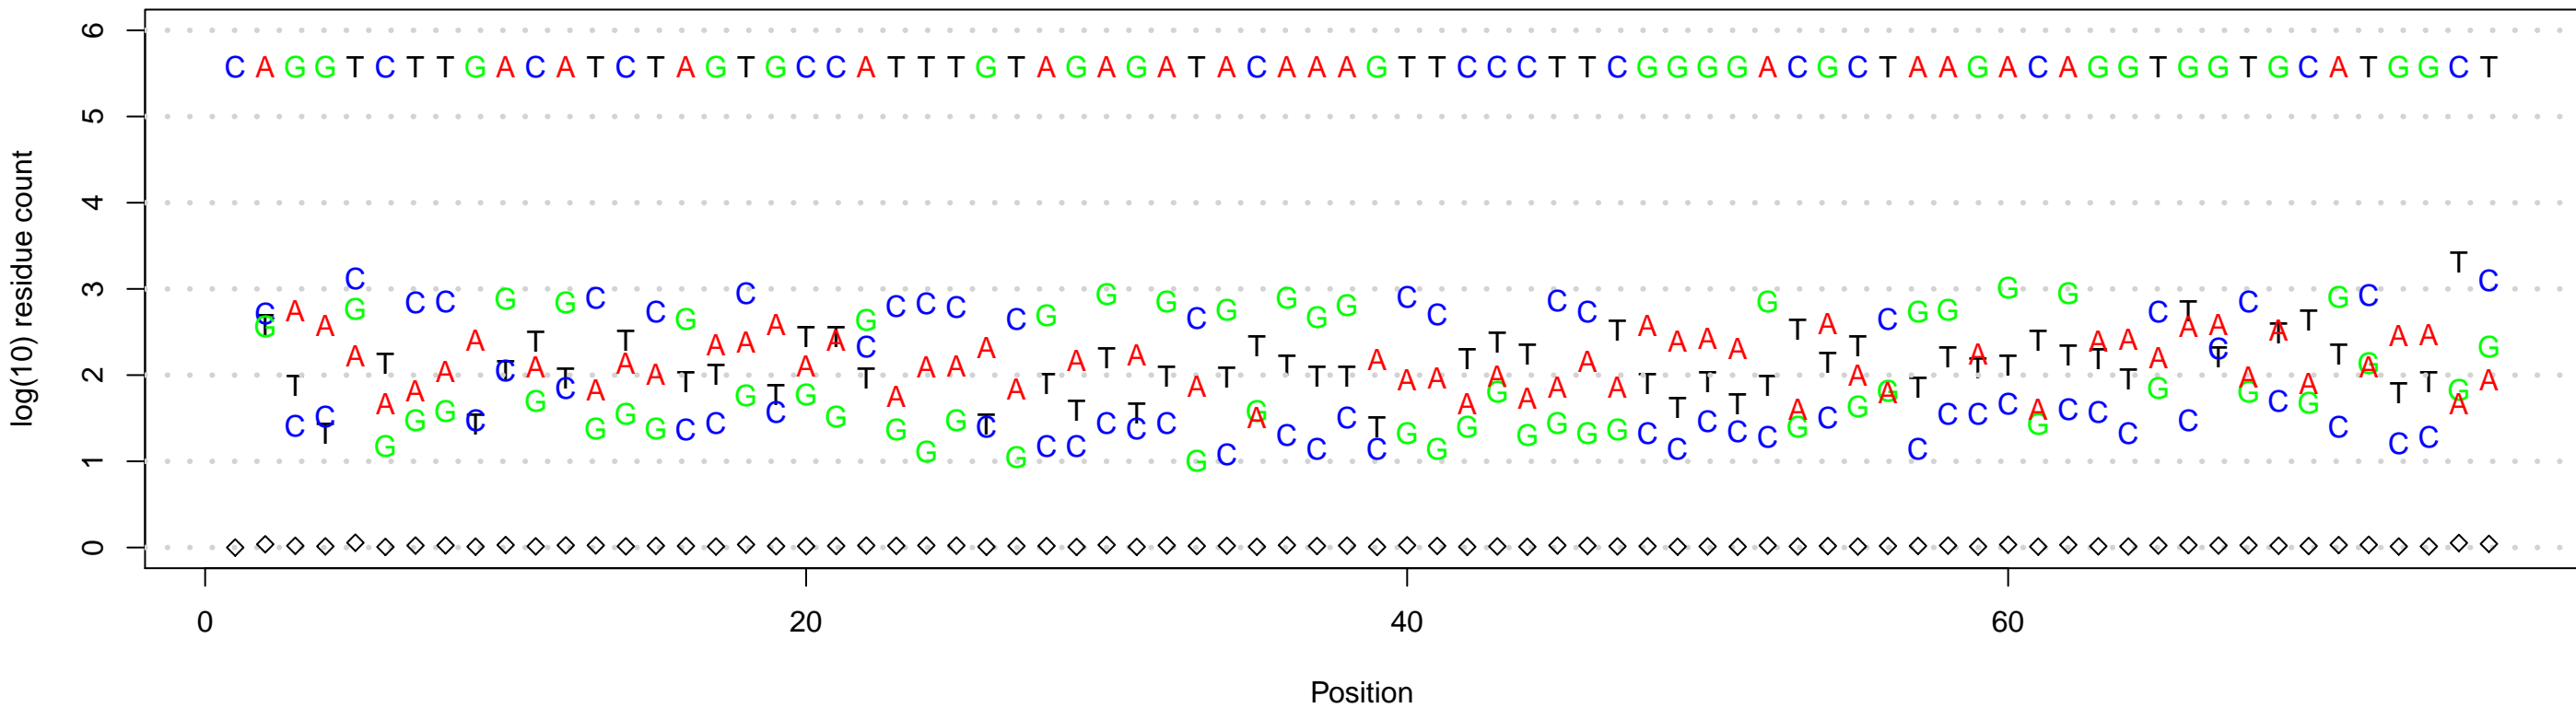

otu 5 0.3 4.6 3.6

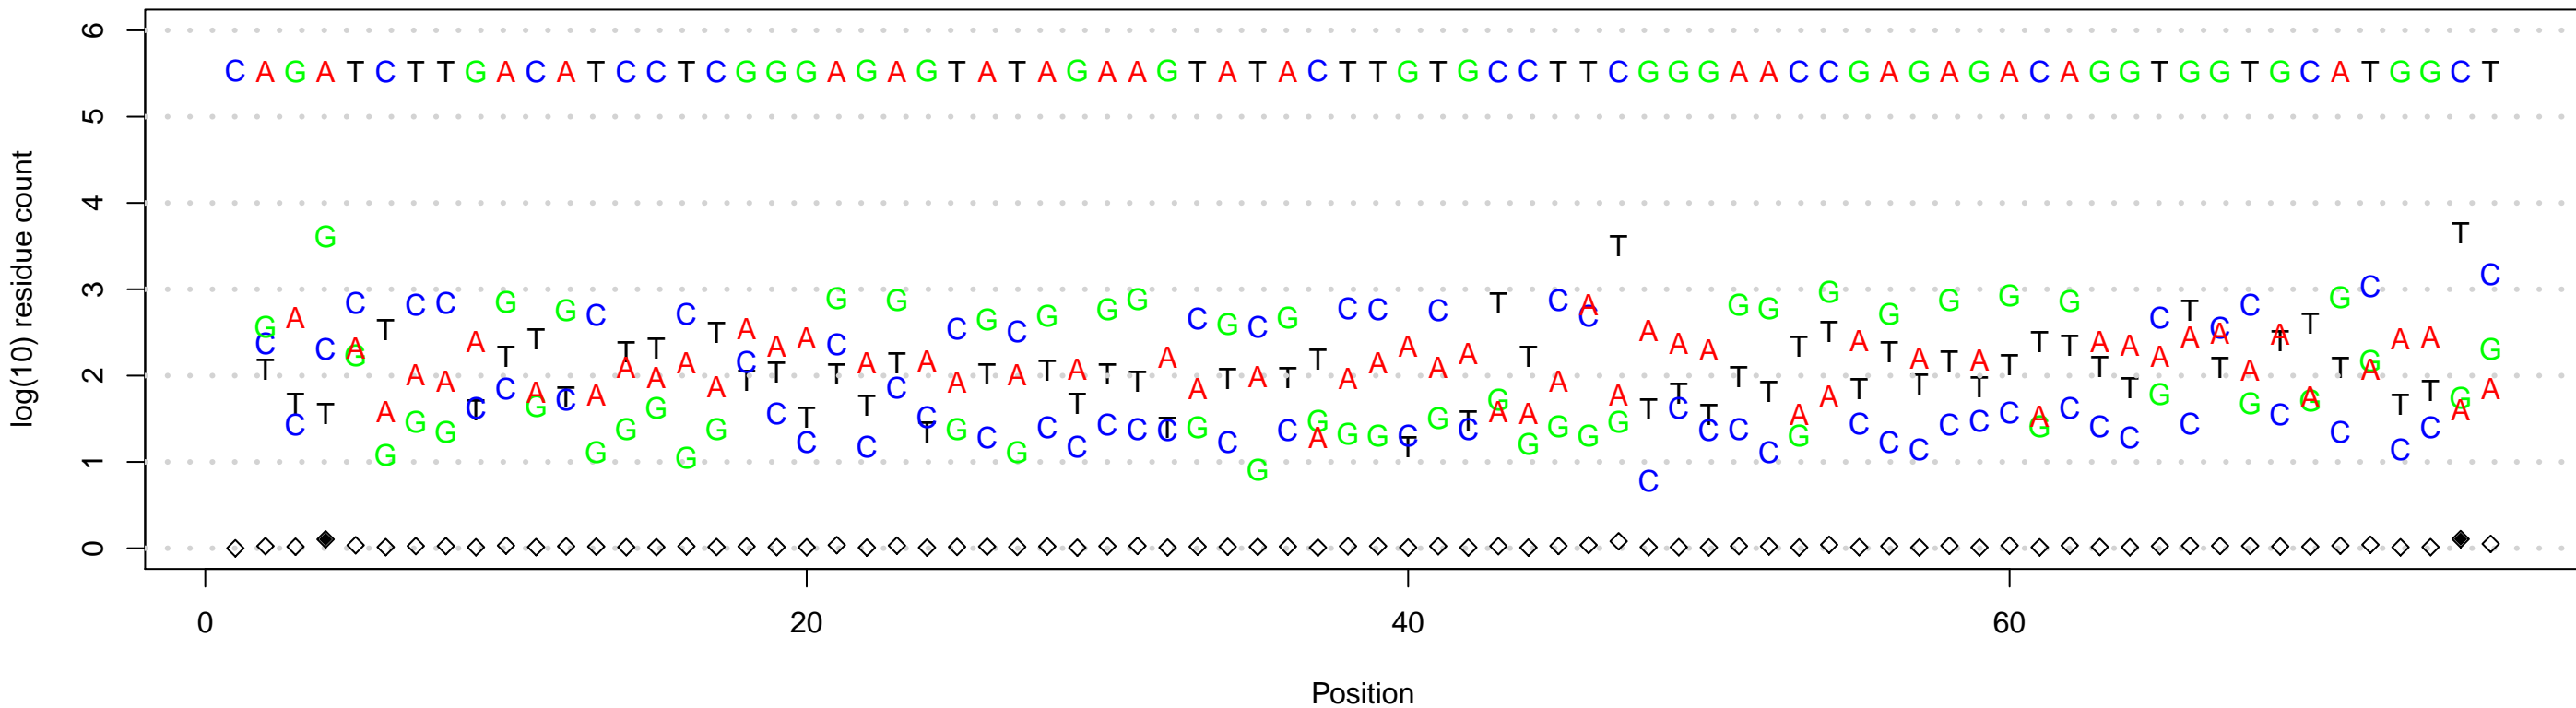

otu 6 0.9 8.1 10.6

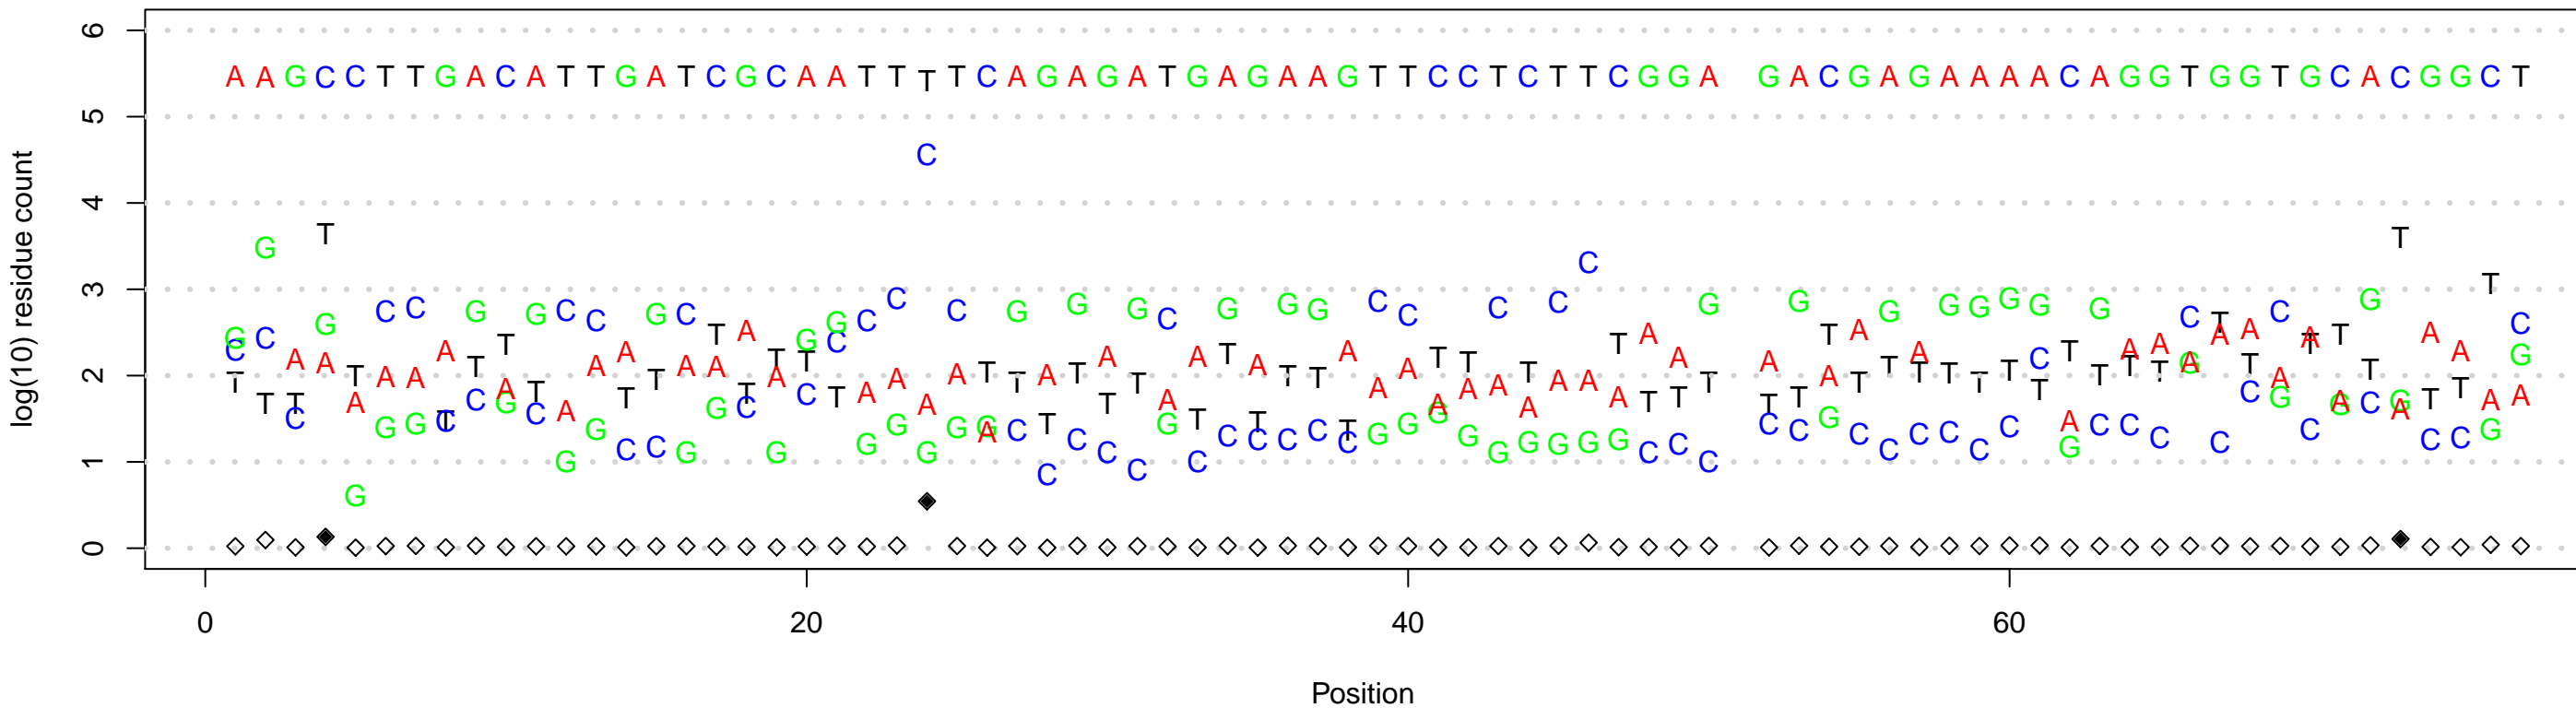

otu 7 0.4 5.0 3.1

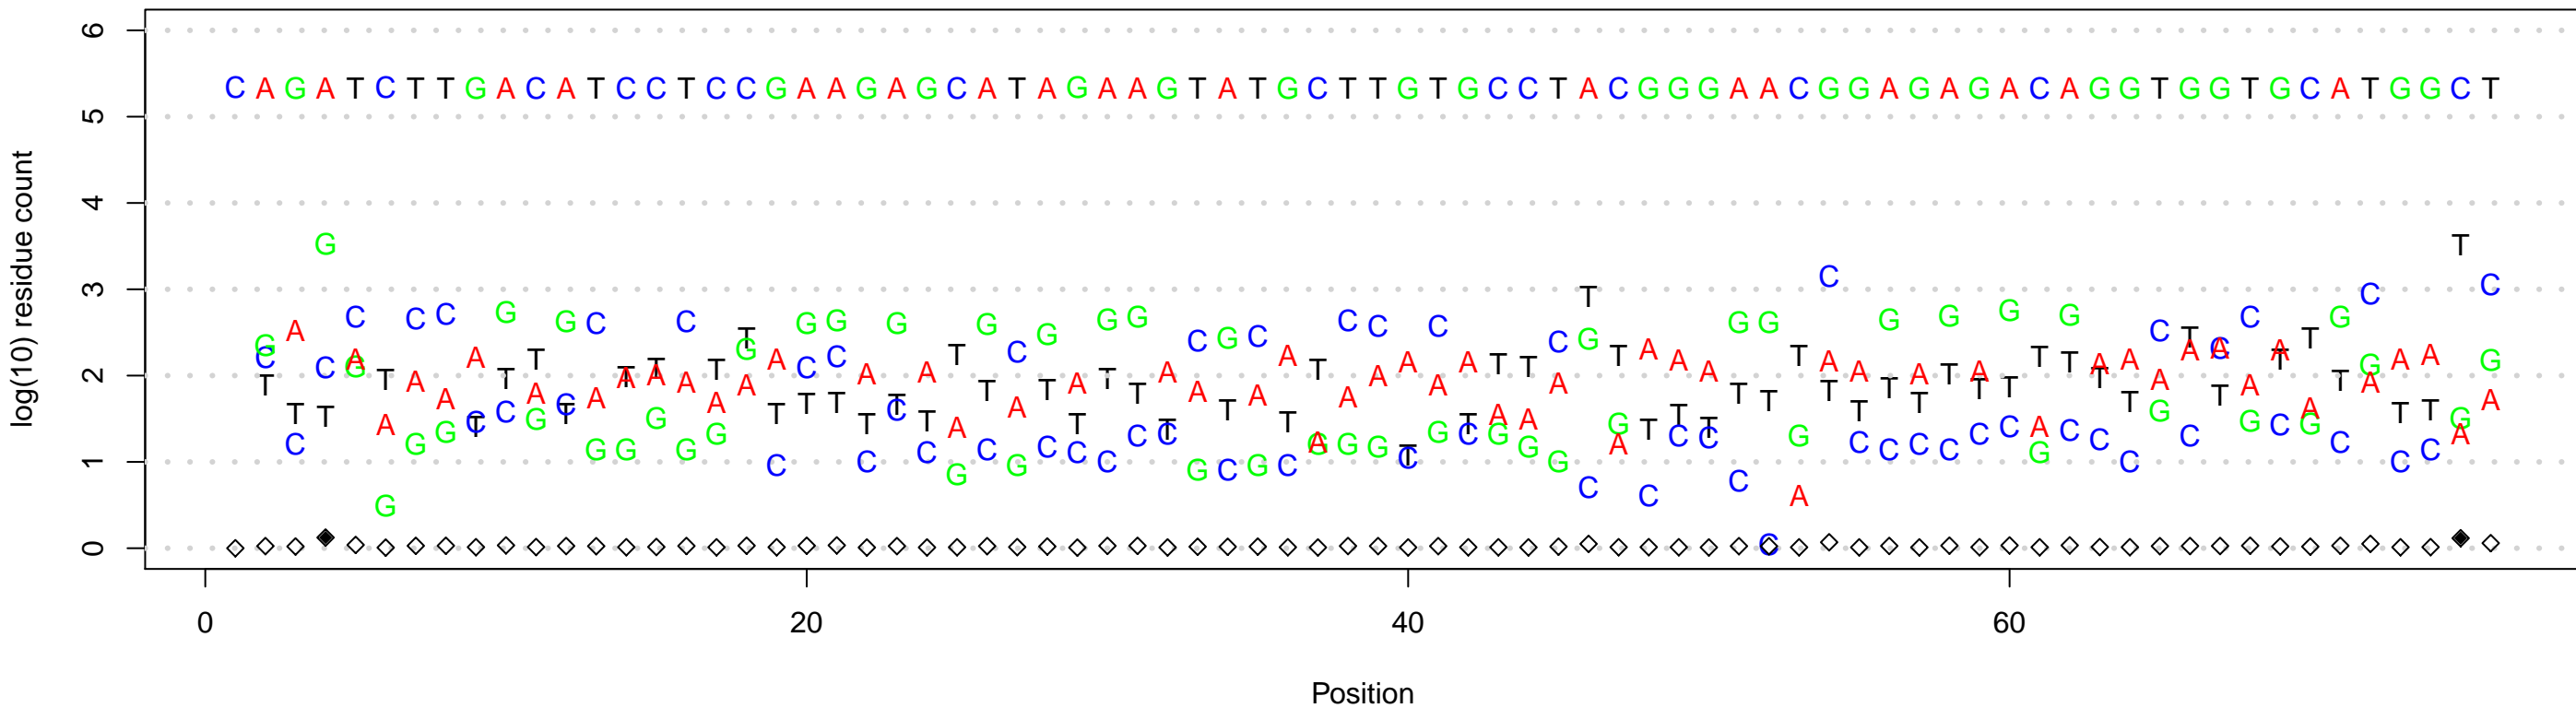



otu 8 0.6 5.4 2.8

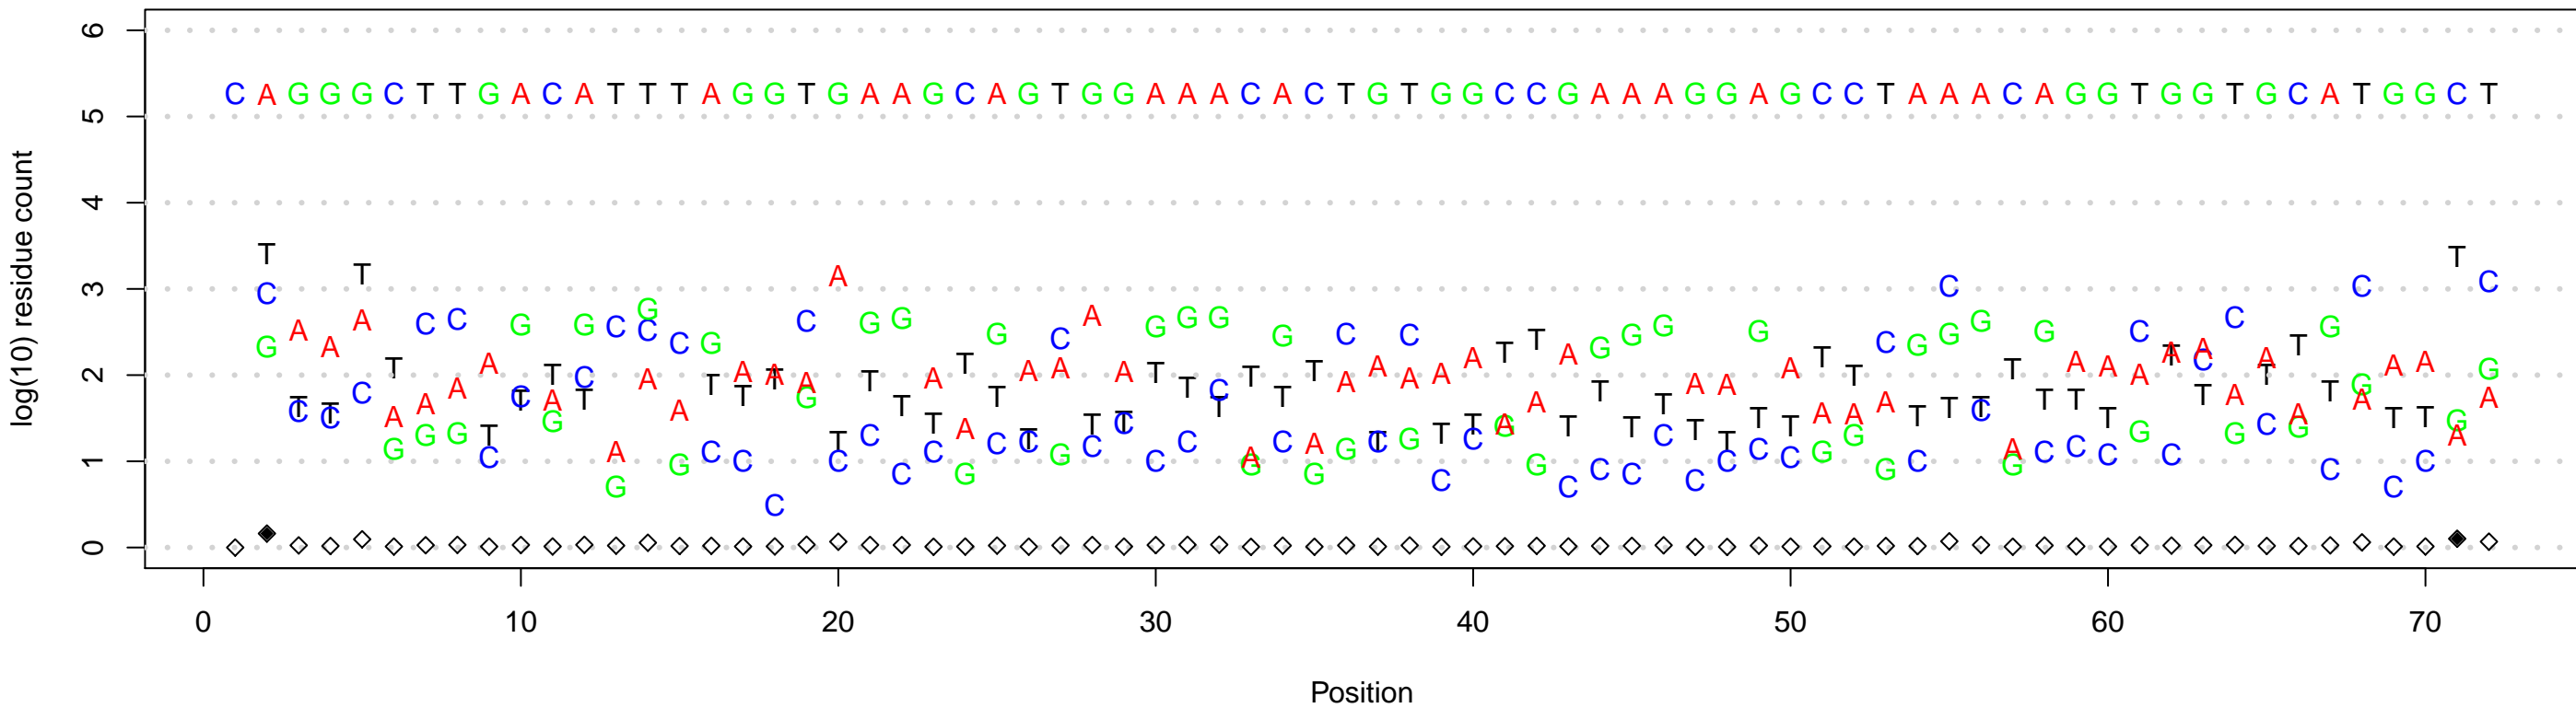

otu 9 3.5 5.2 4.1

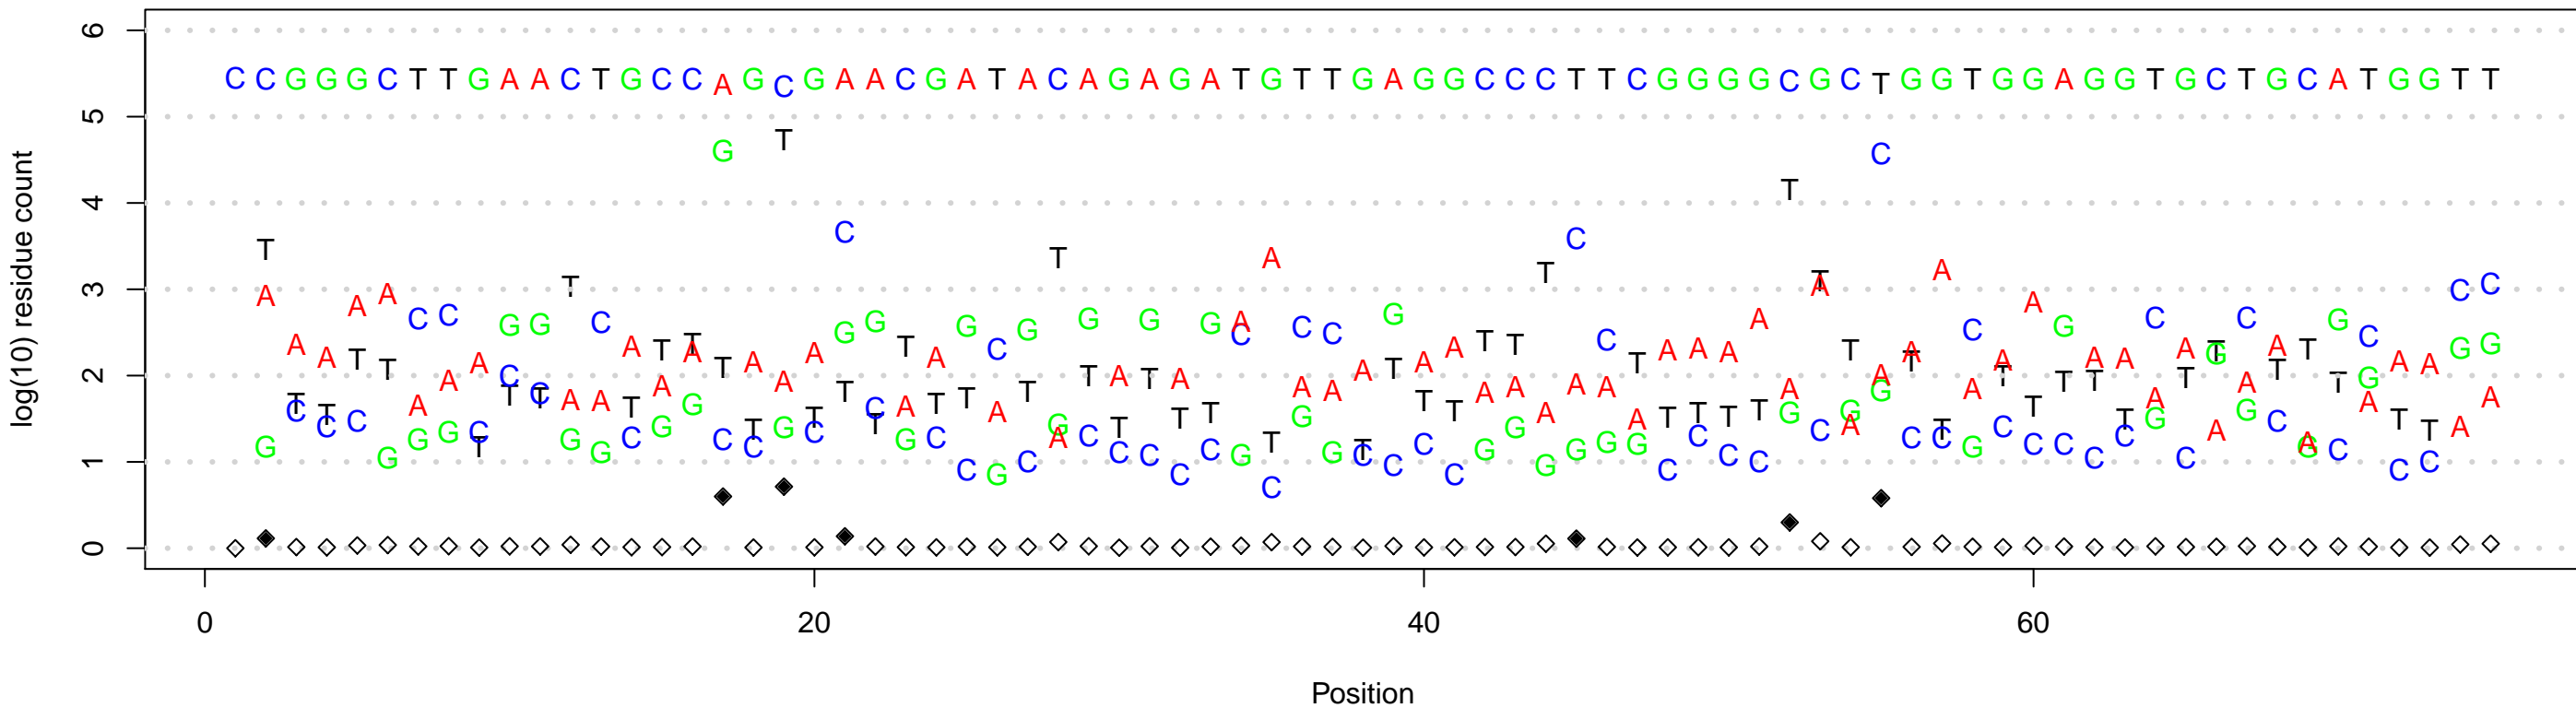

otu 10 1.0 6.3 14.7

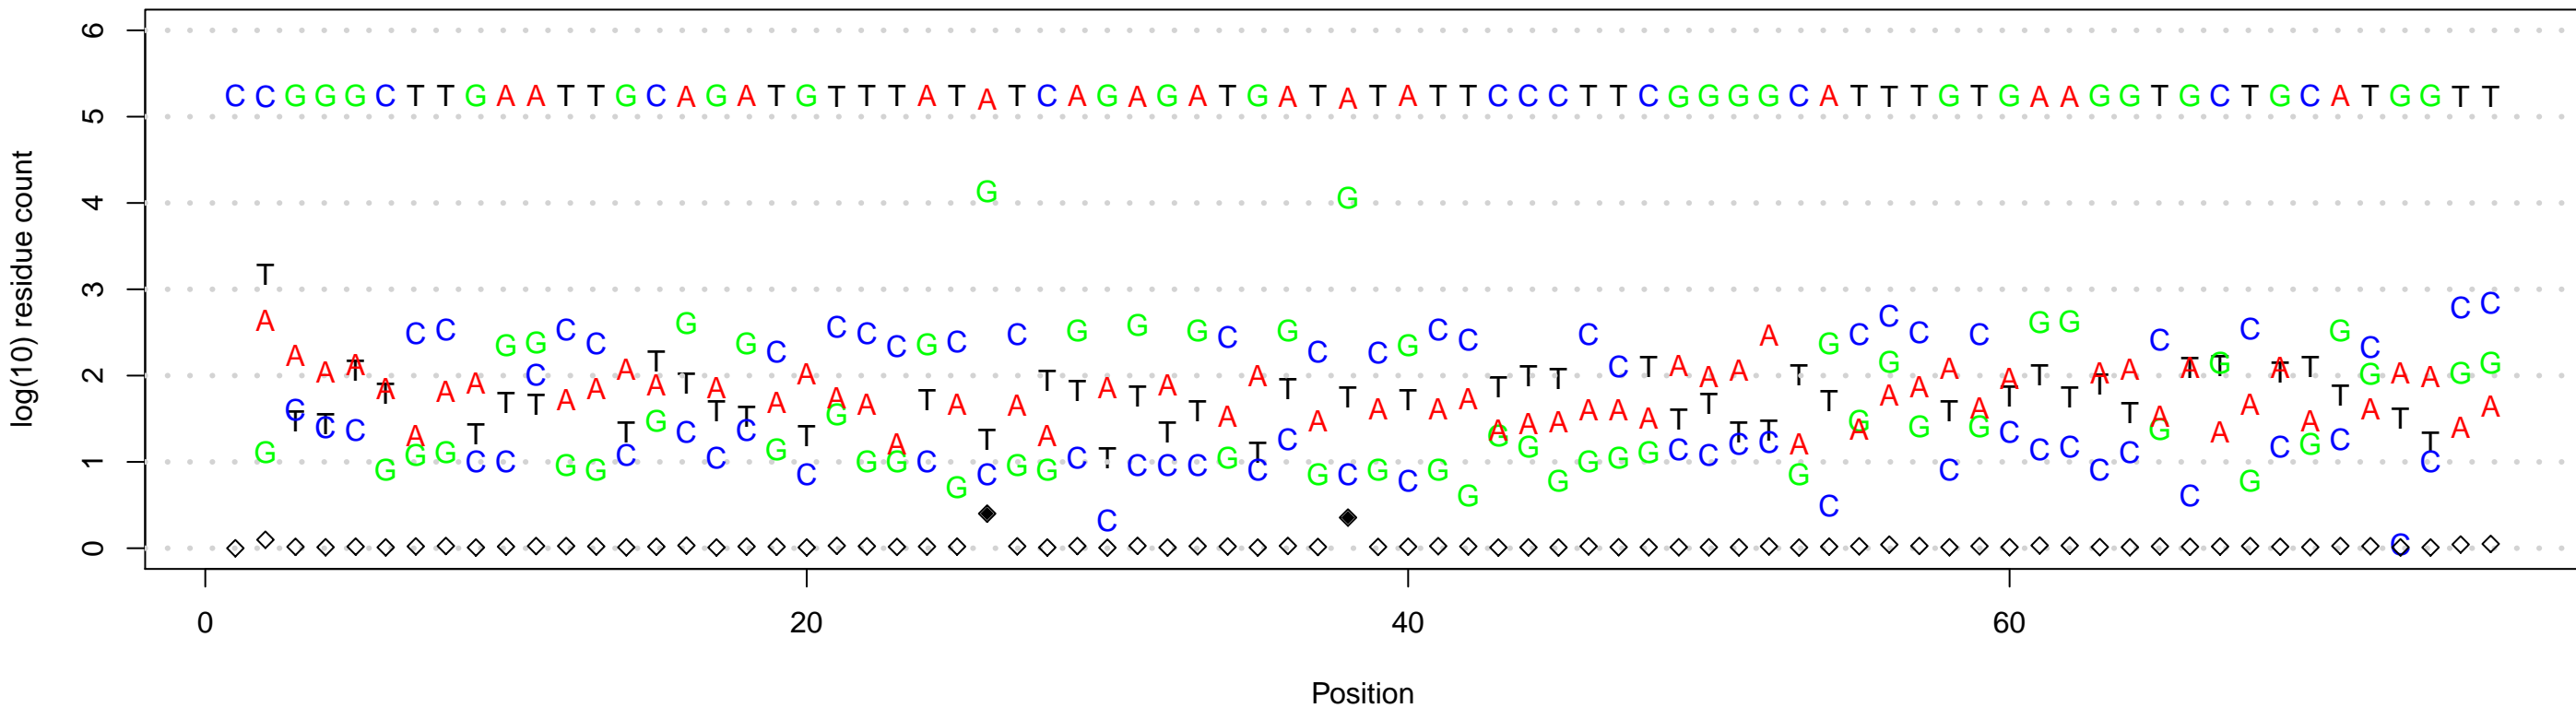

otu 11 0.5 6.0 4.5

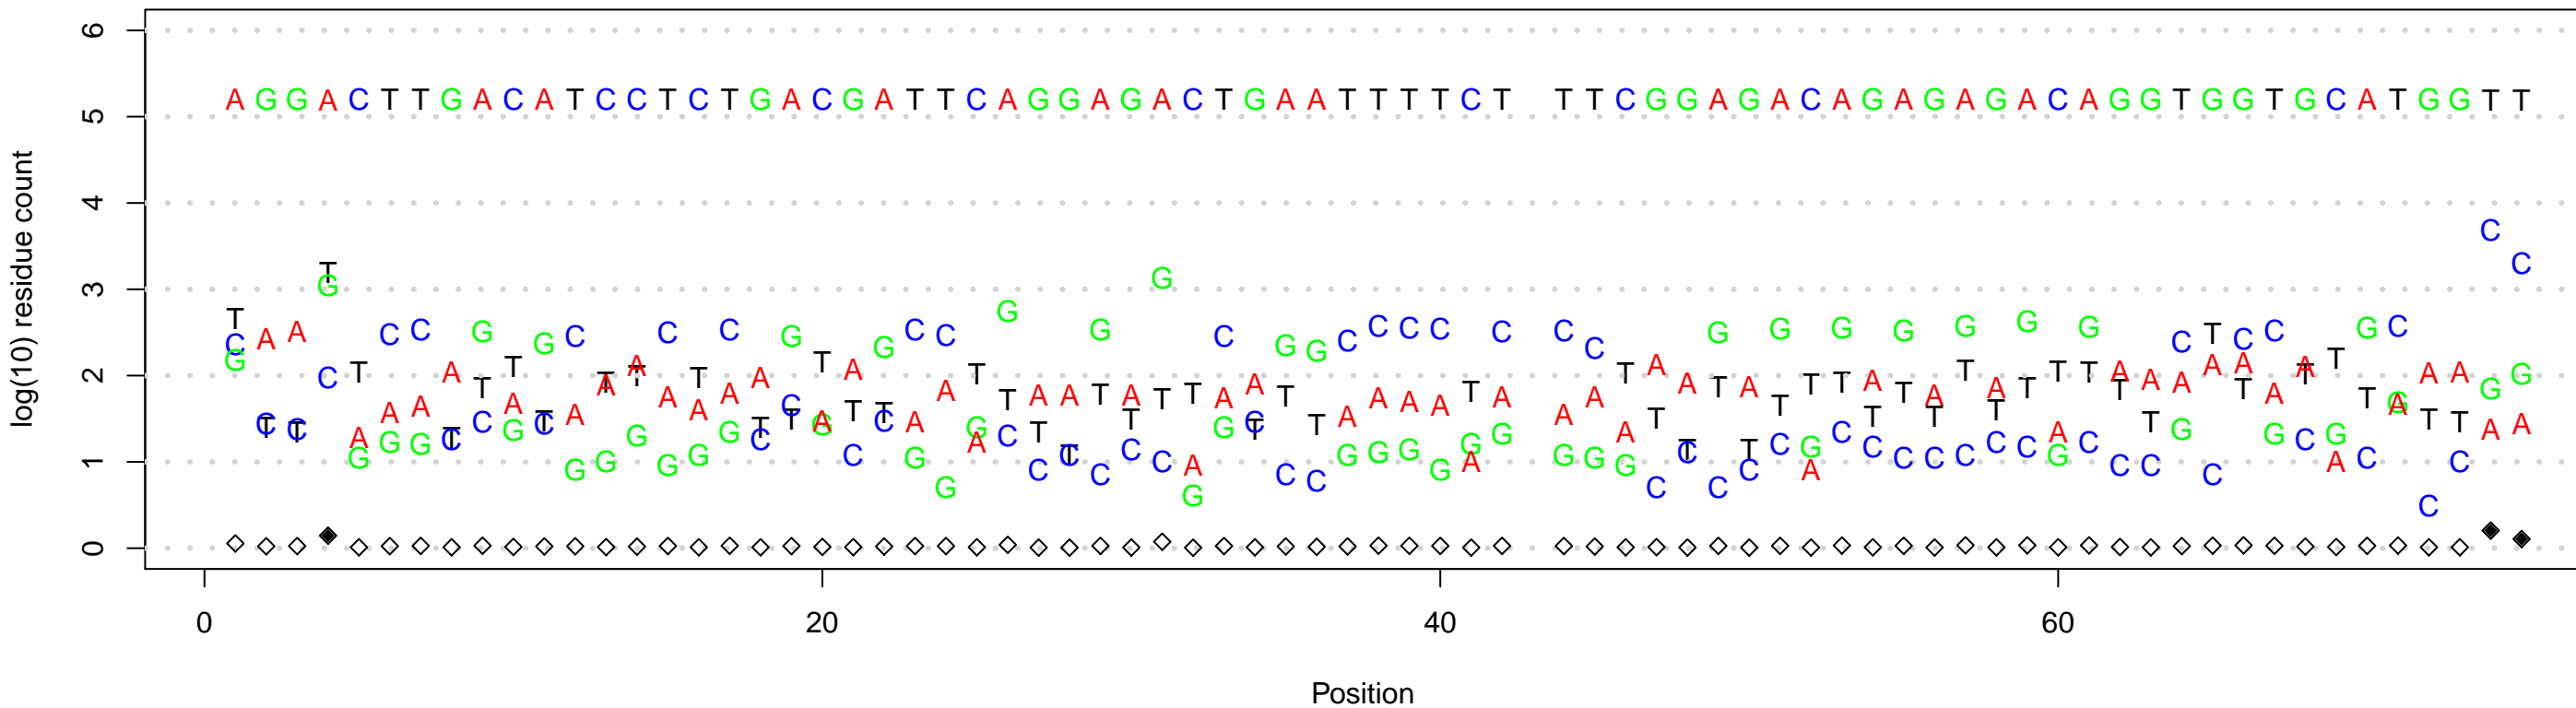



otu 13 1.9 6.1 2.6

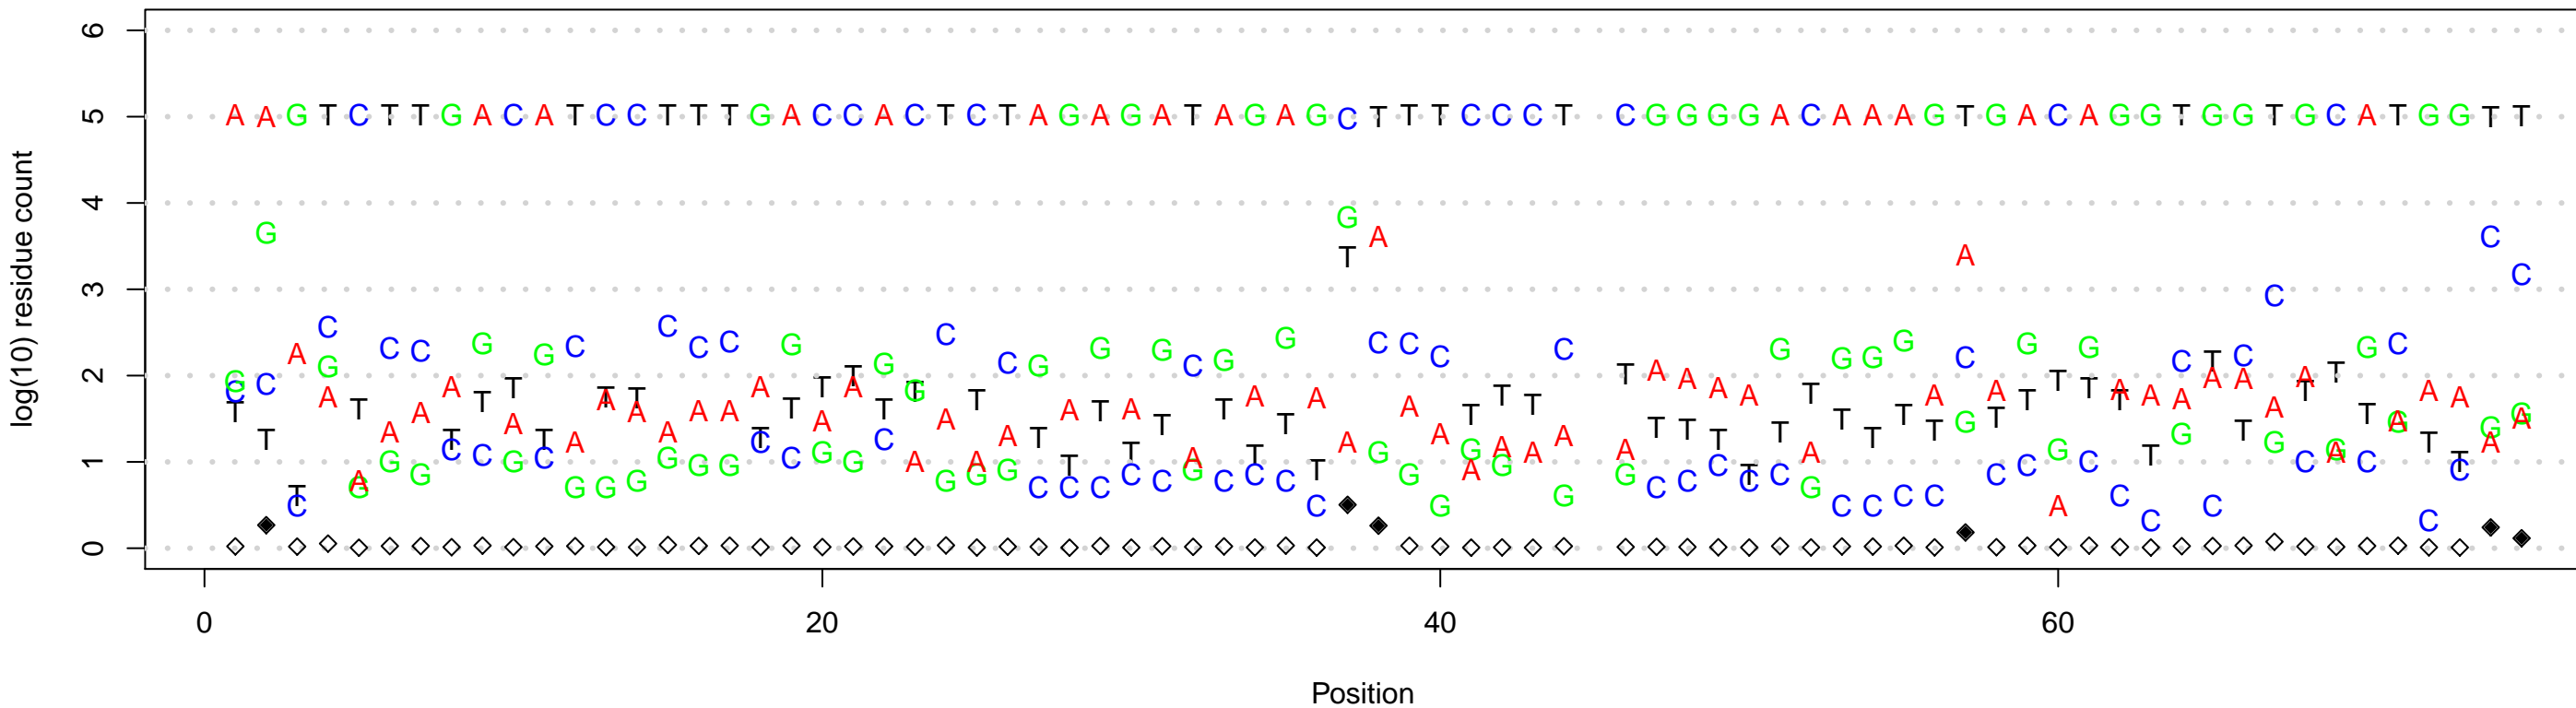

otu 14 0.6 4.2 1.9

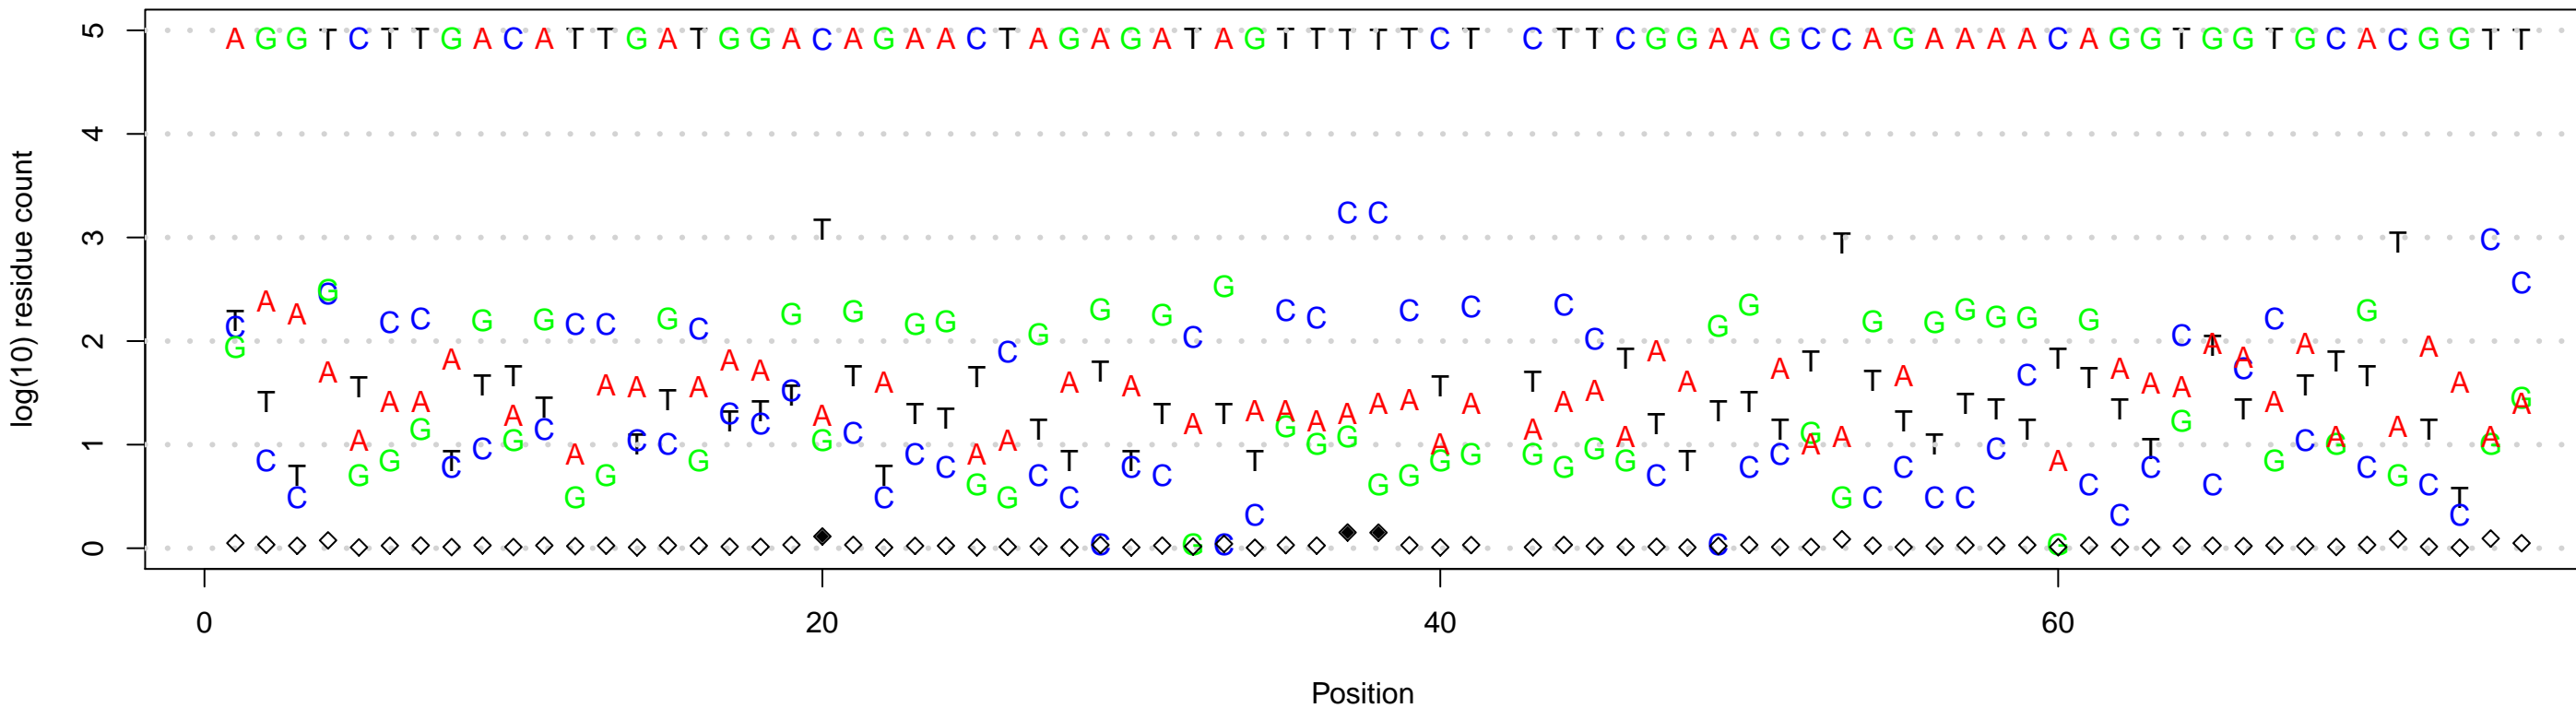

otu 15 0.9 4.9 2.1

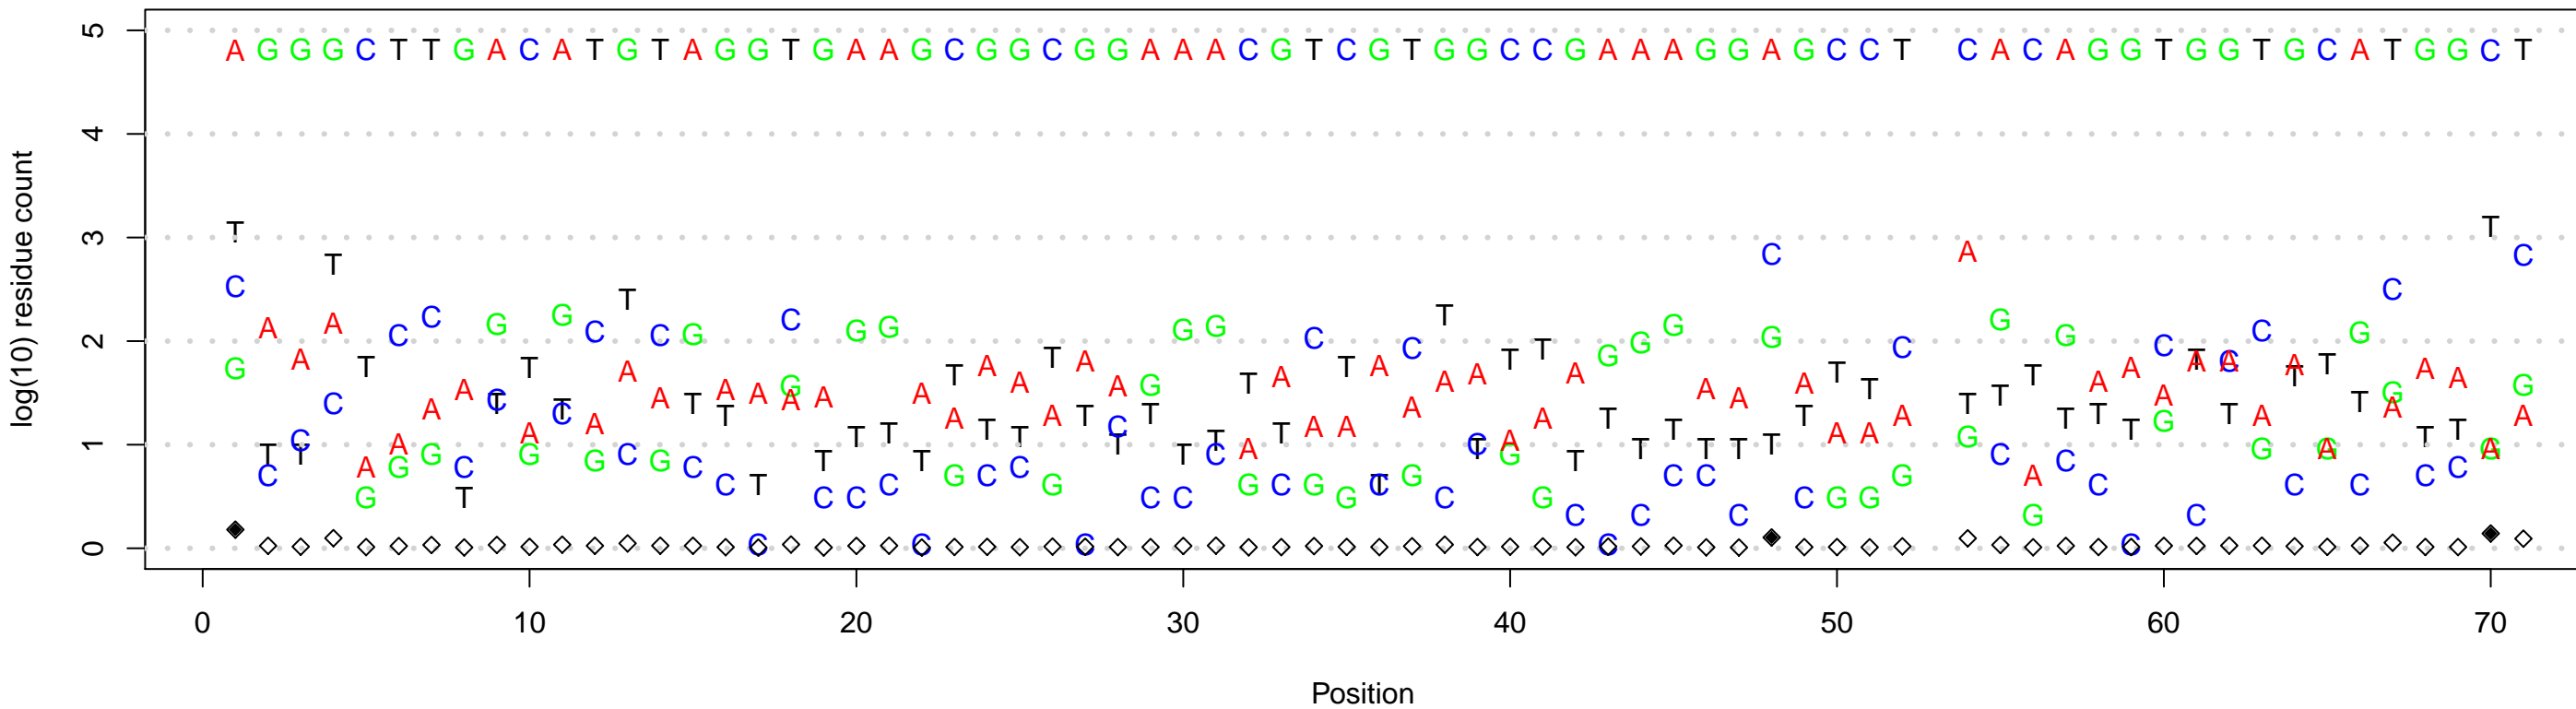



otu 16 1.0 7.9 12.4

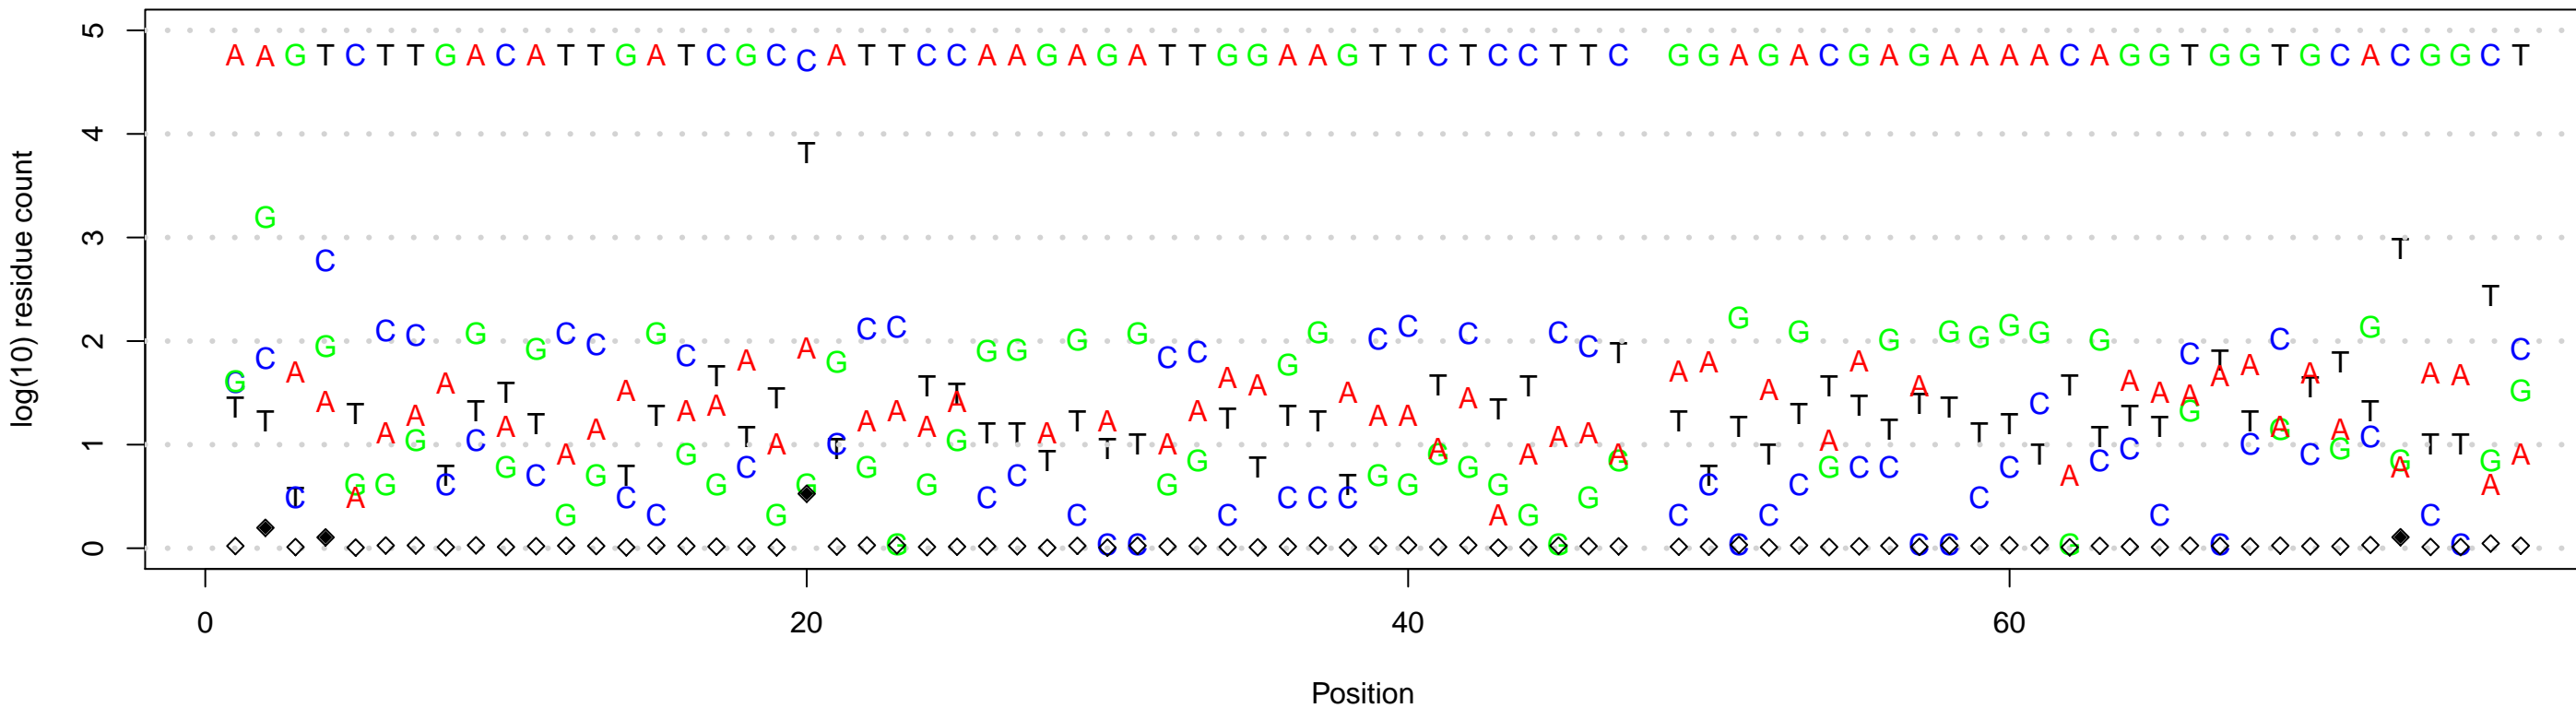

otu 17 1.1 4.8 1.9

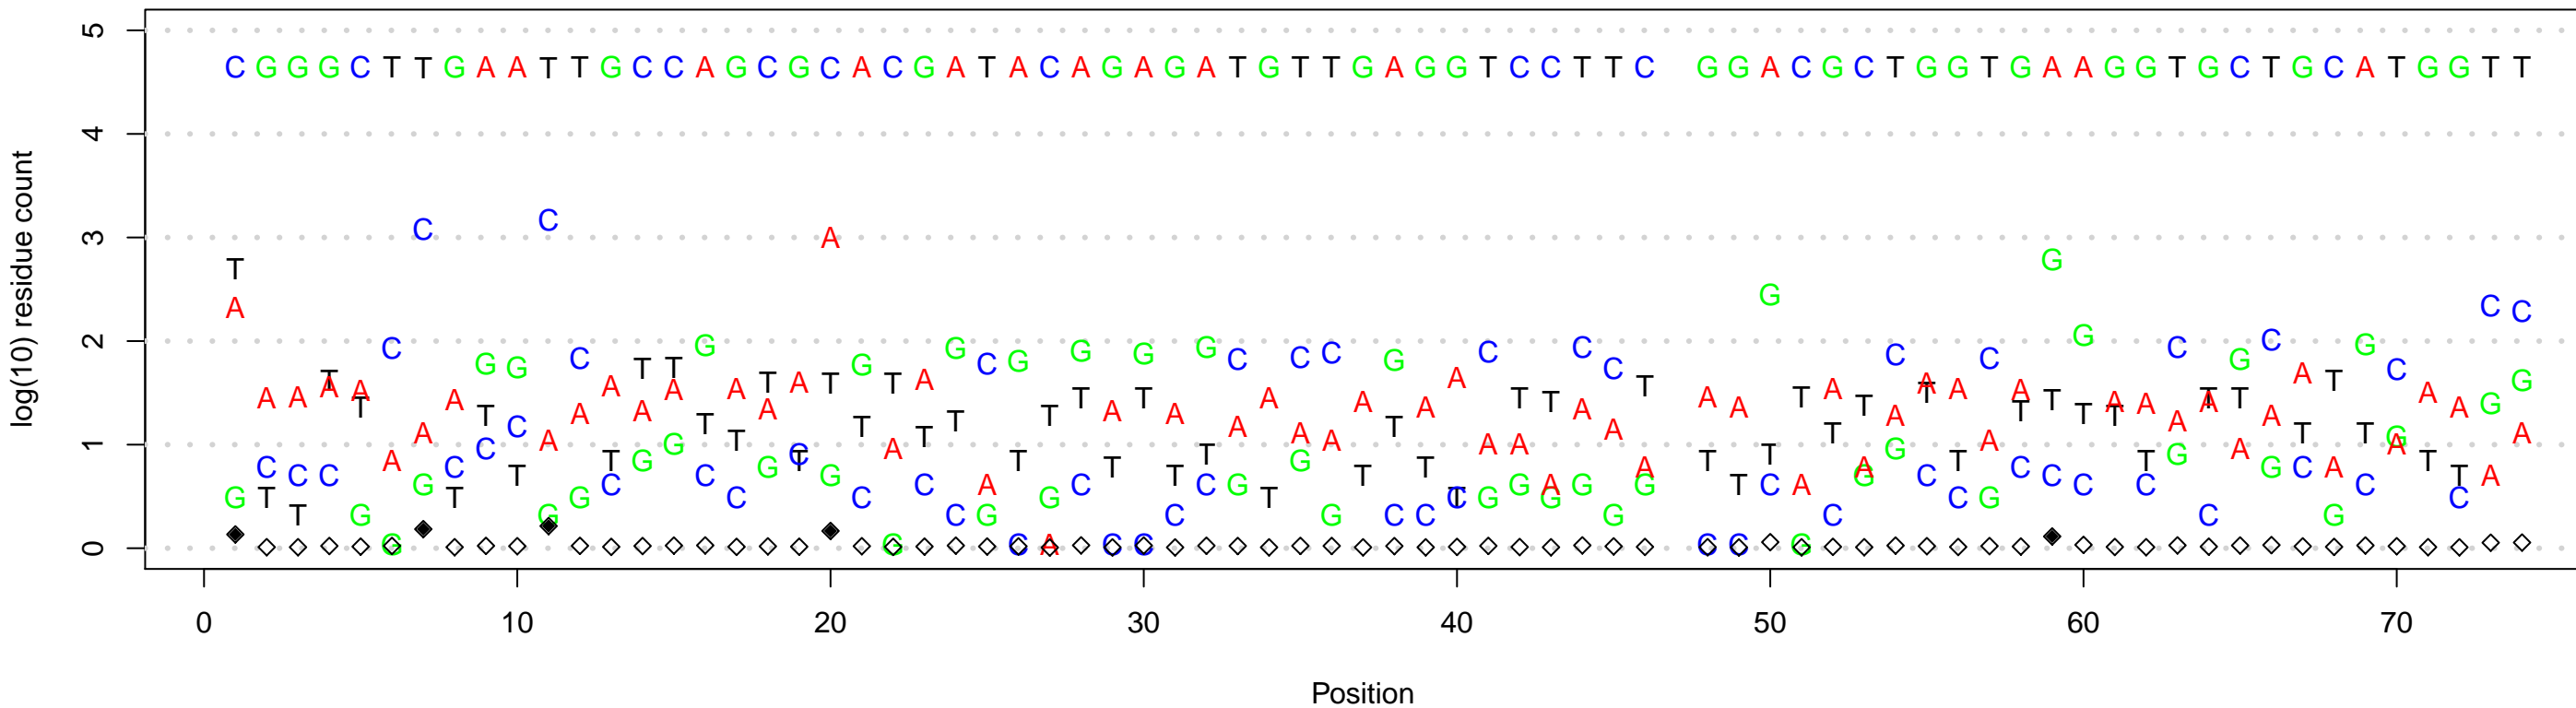

otu 18 2.0 4.4 1.9

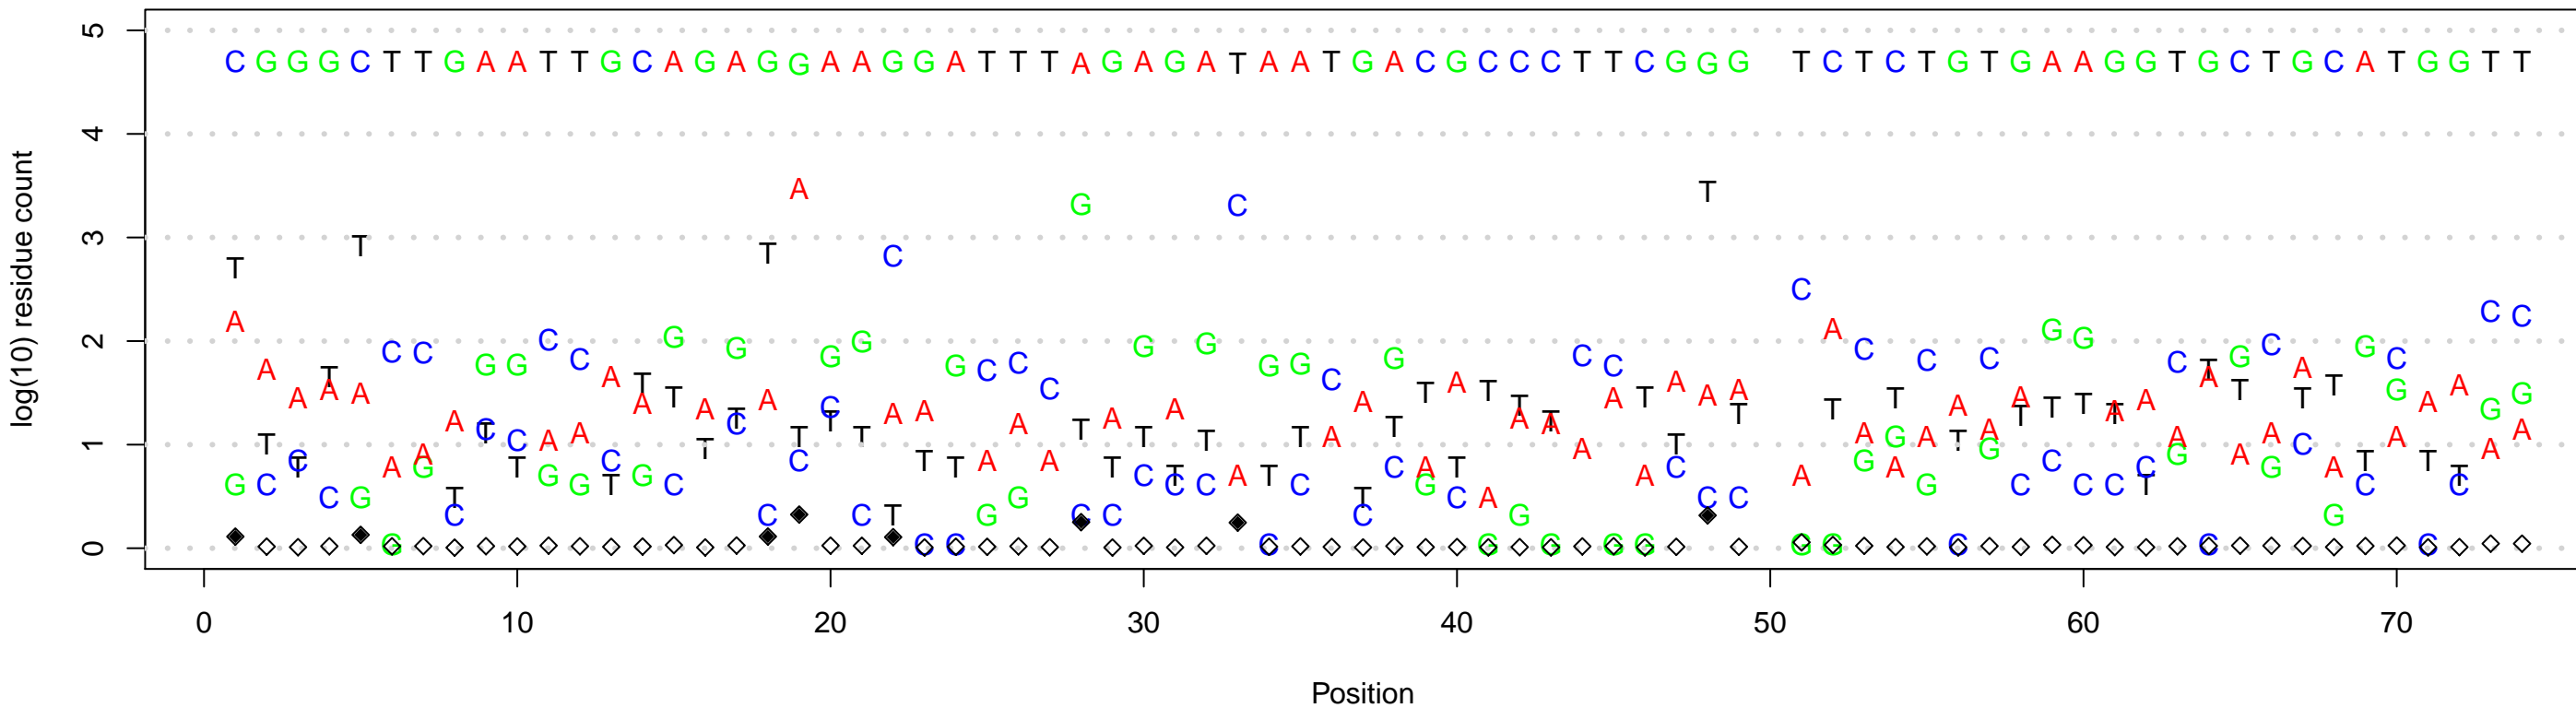

otu 19 0.6 5.9 4.9

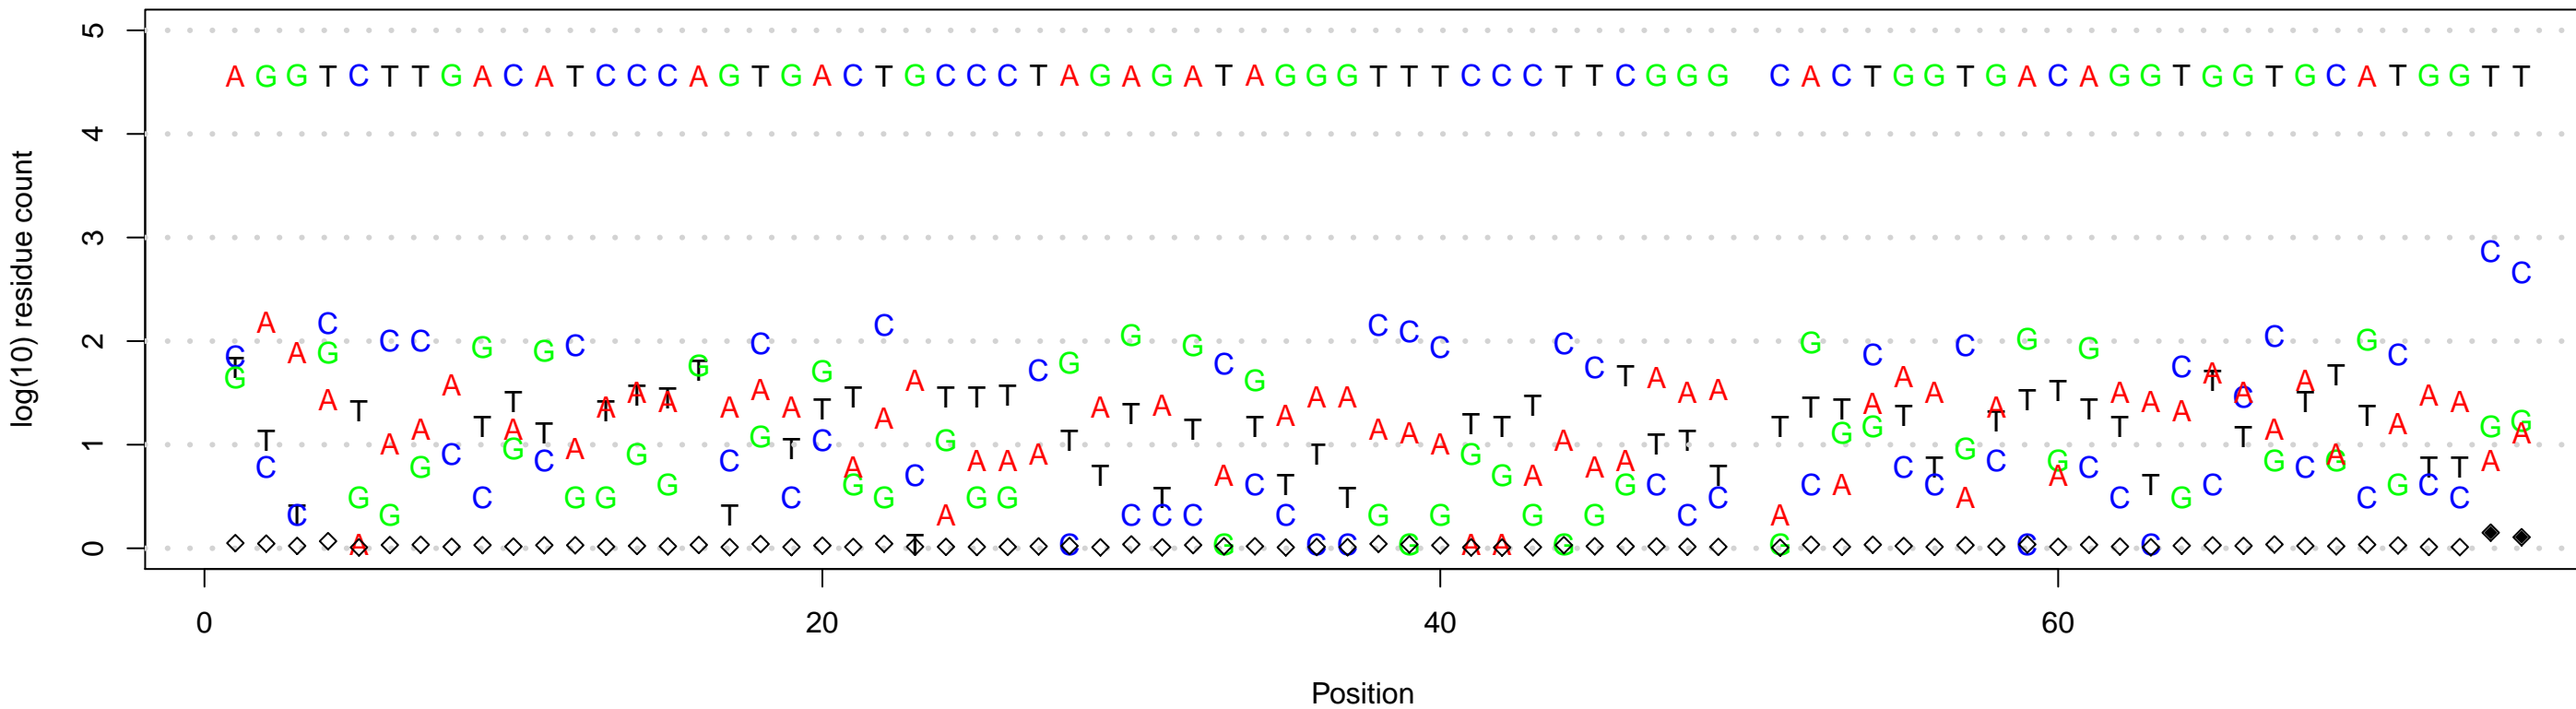

otu 20 0.7 6.0 5.3

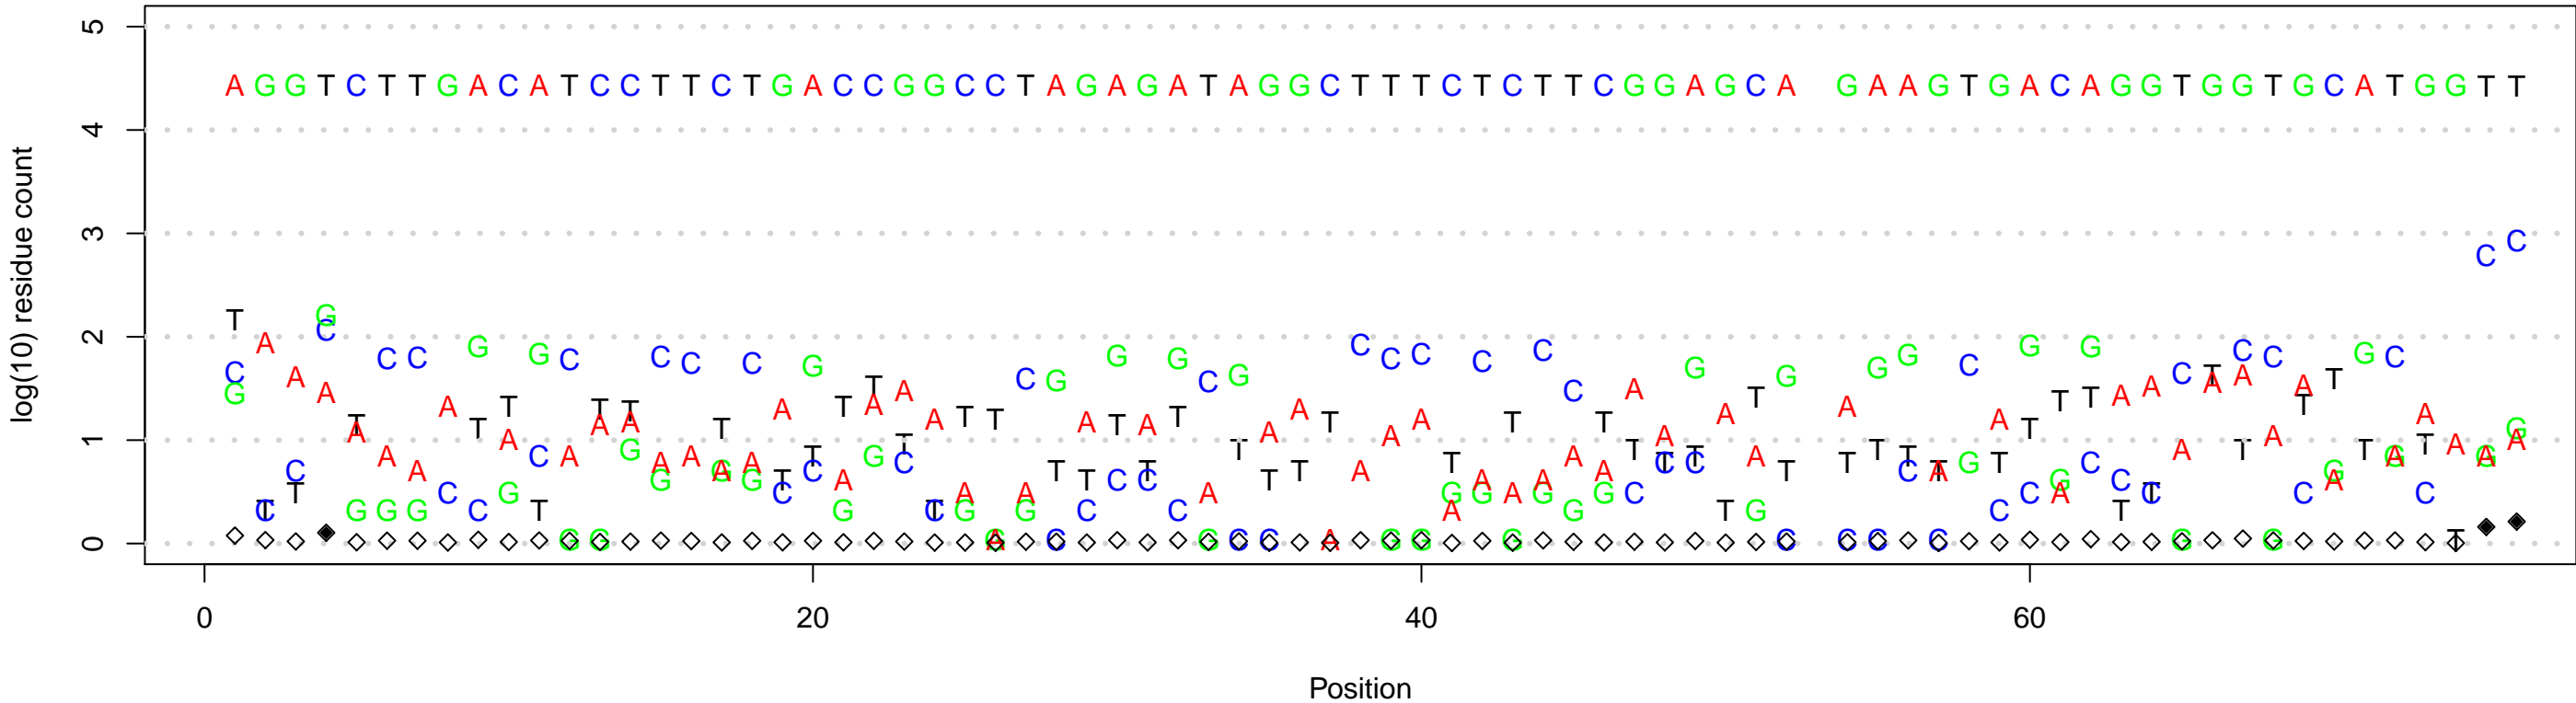

otu 21 1.3 7.9 10.4

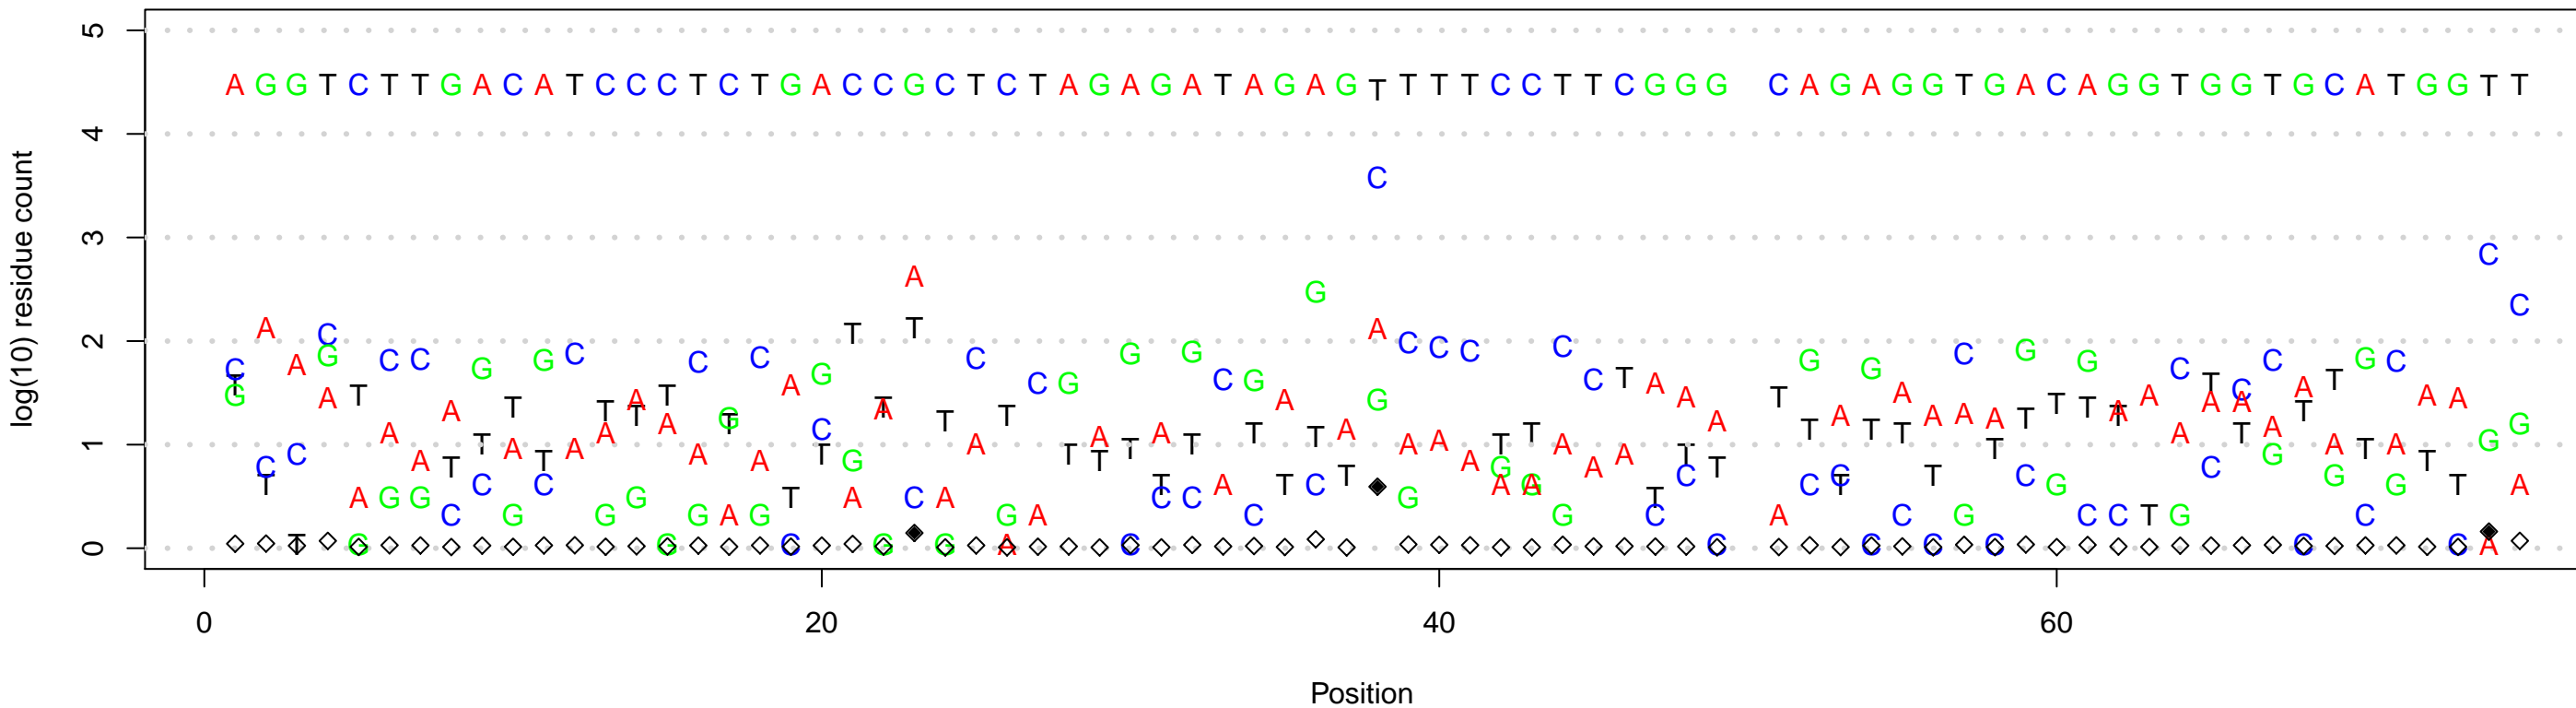

otu 22 1.9 6.0 11.7

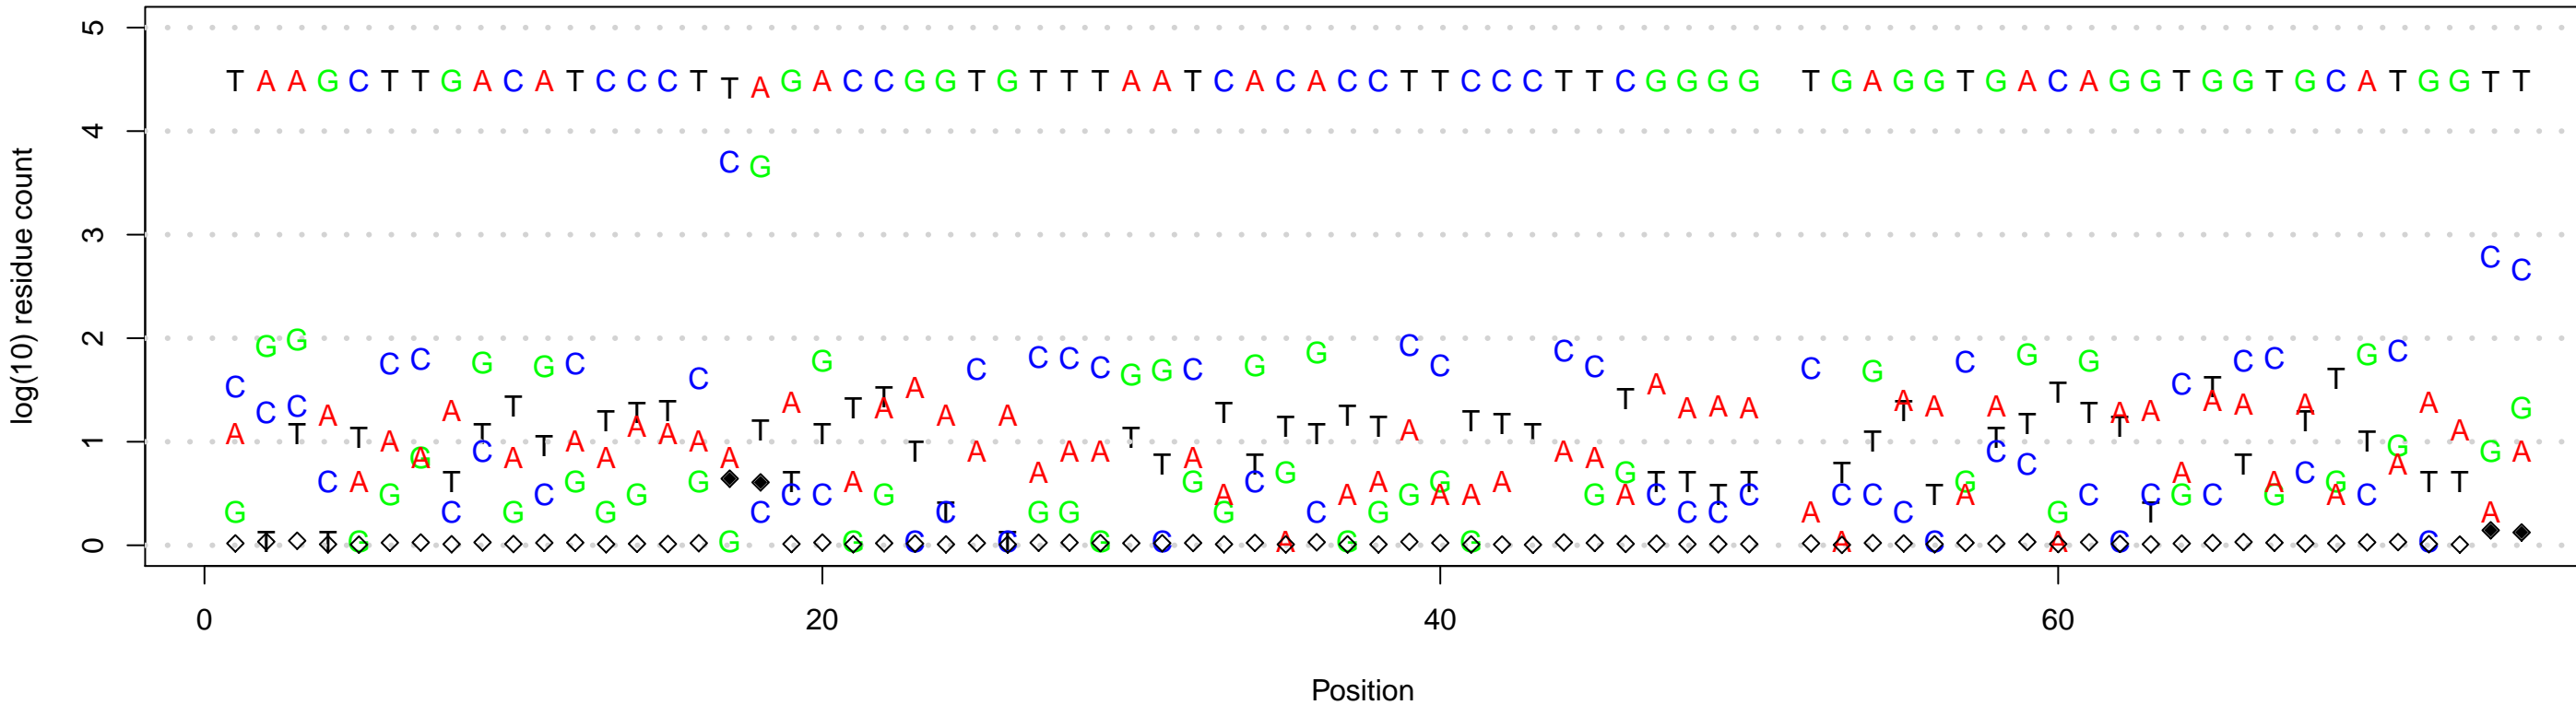

otu 23 1.1 7.7 12.3

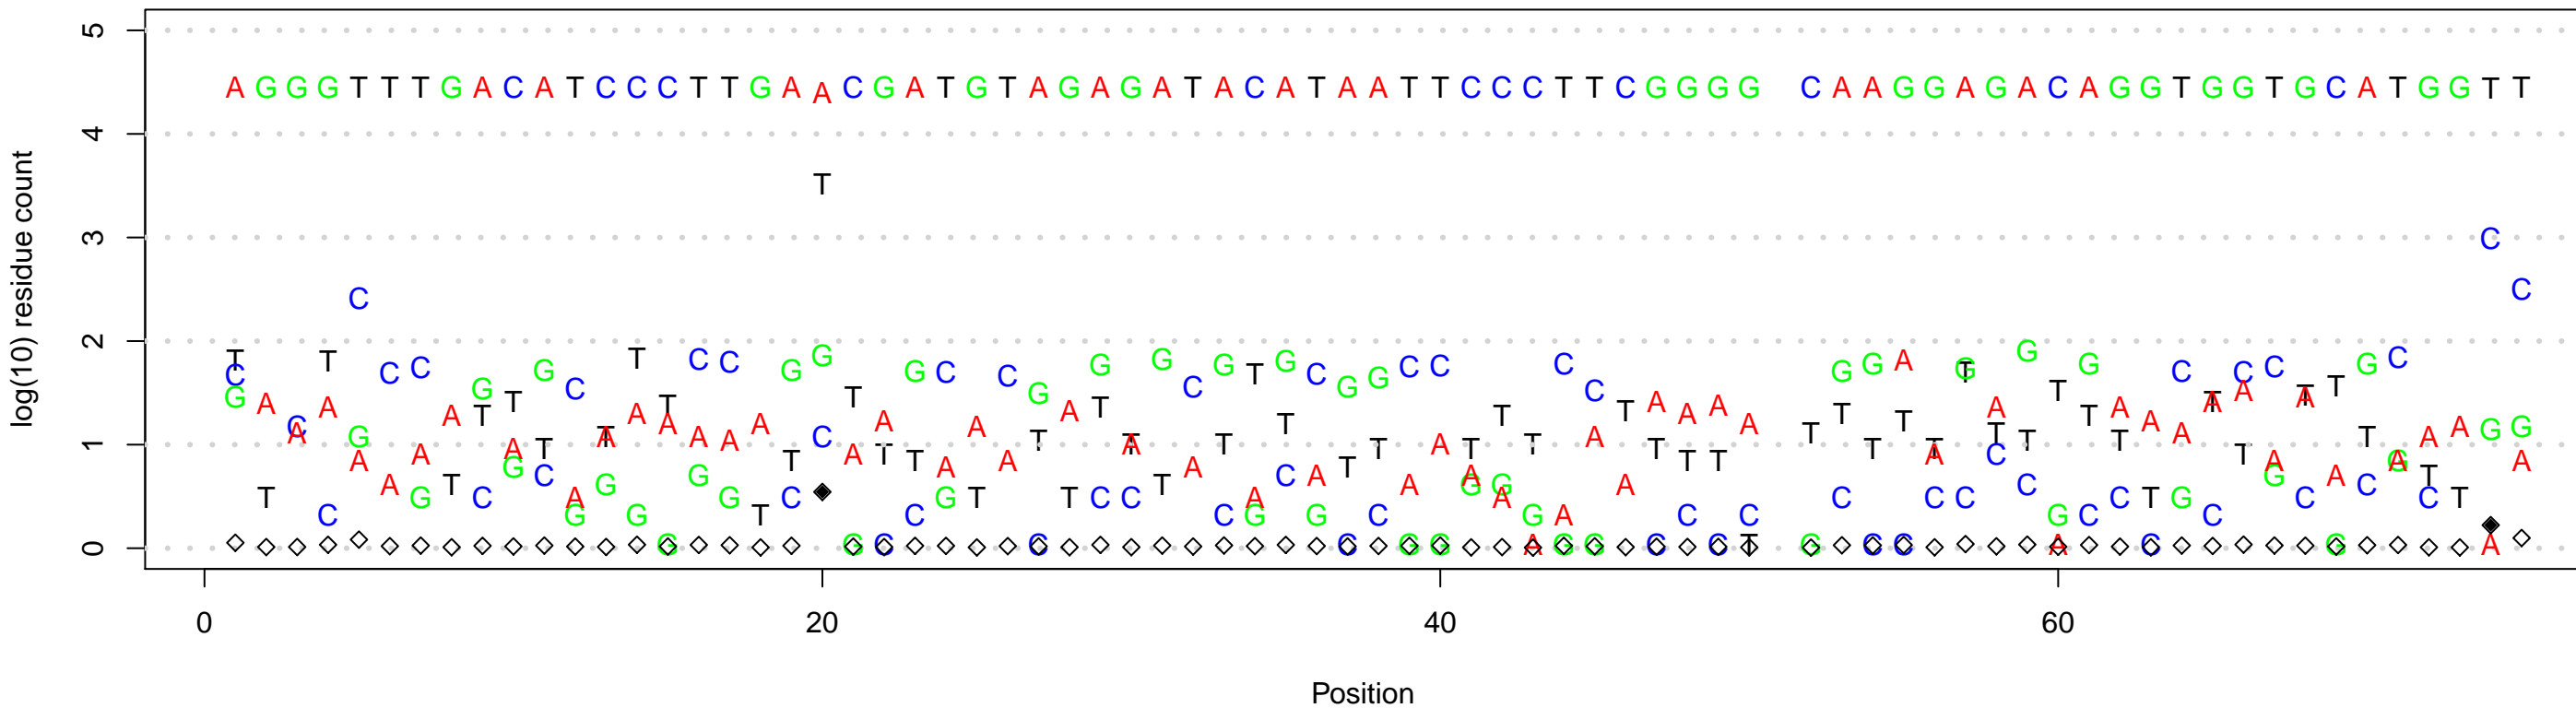



otu 24 1.1 4.3 1.7

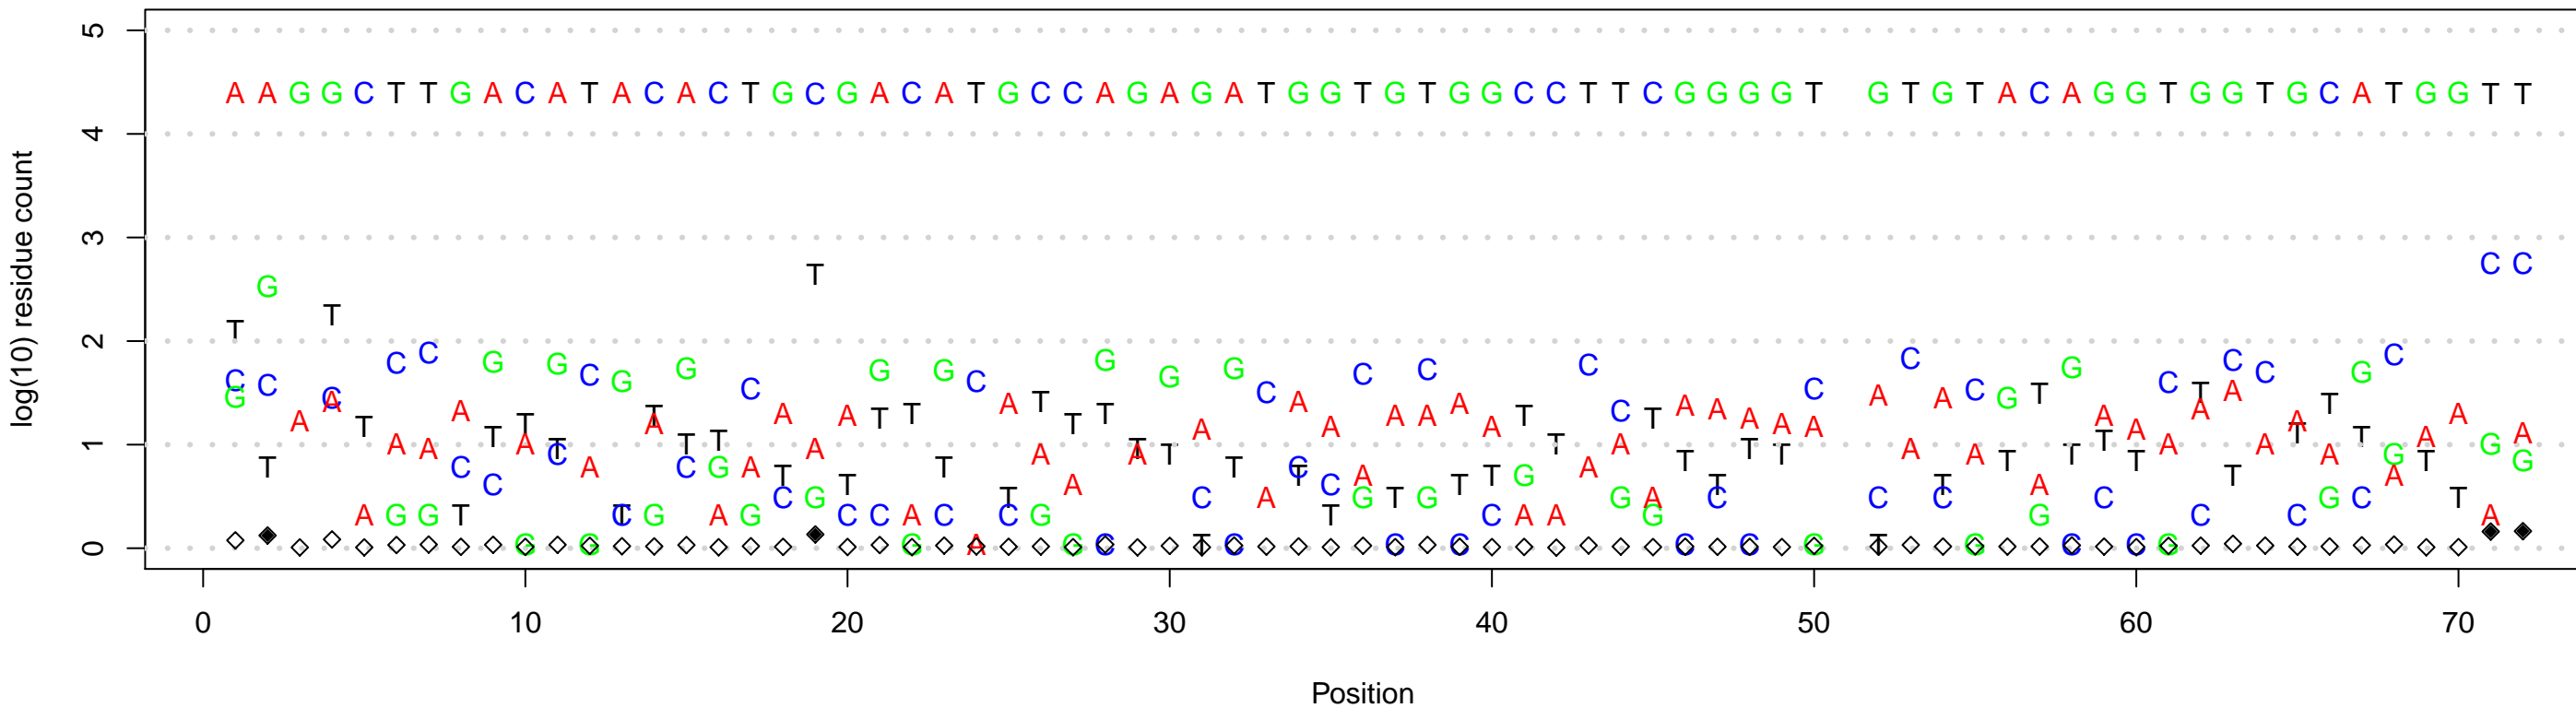

otu 25 0.8 5.1 2.1

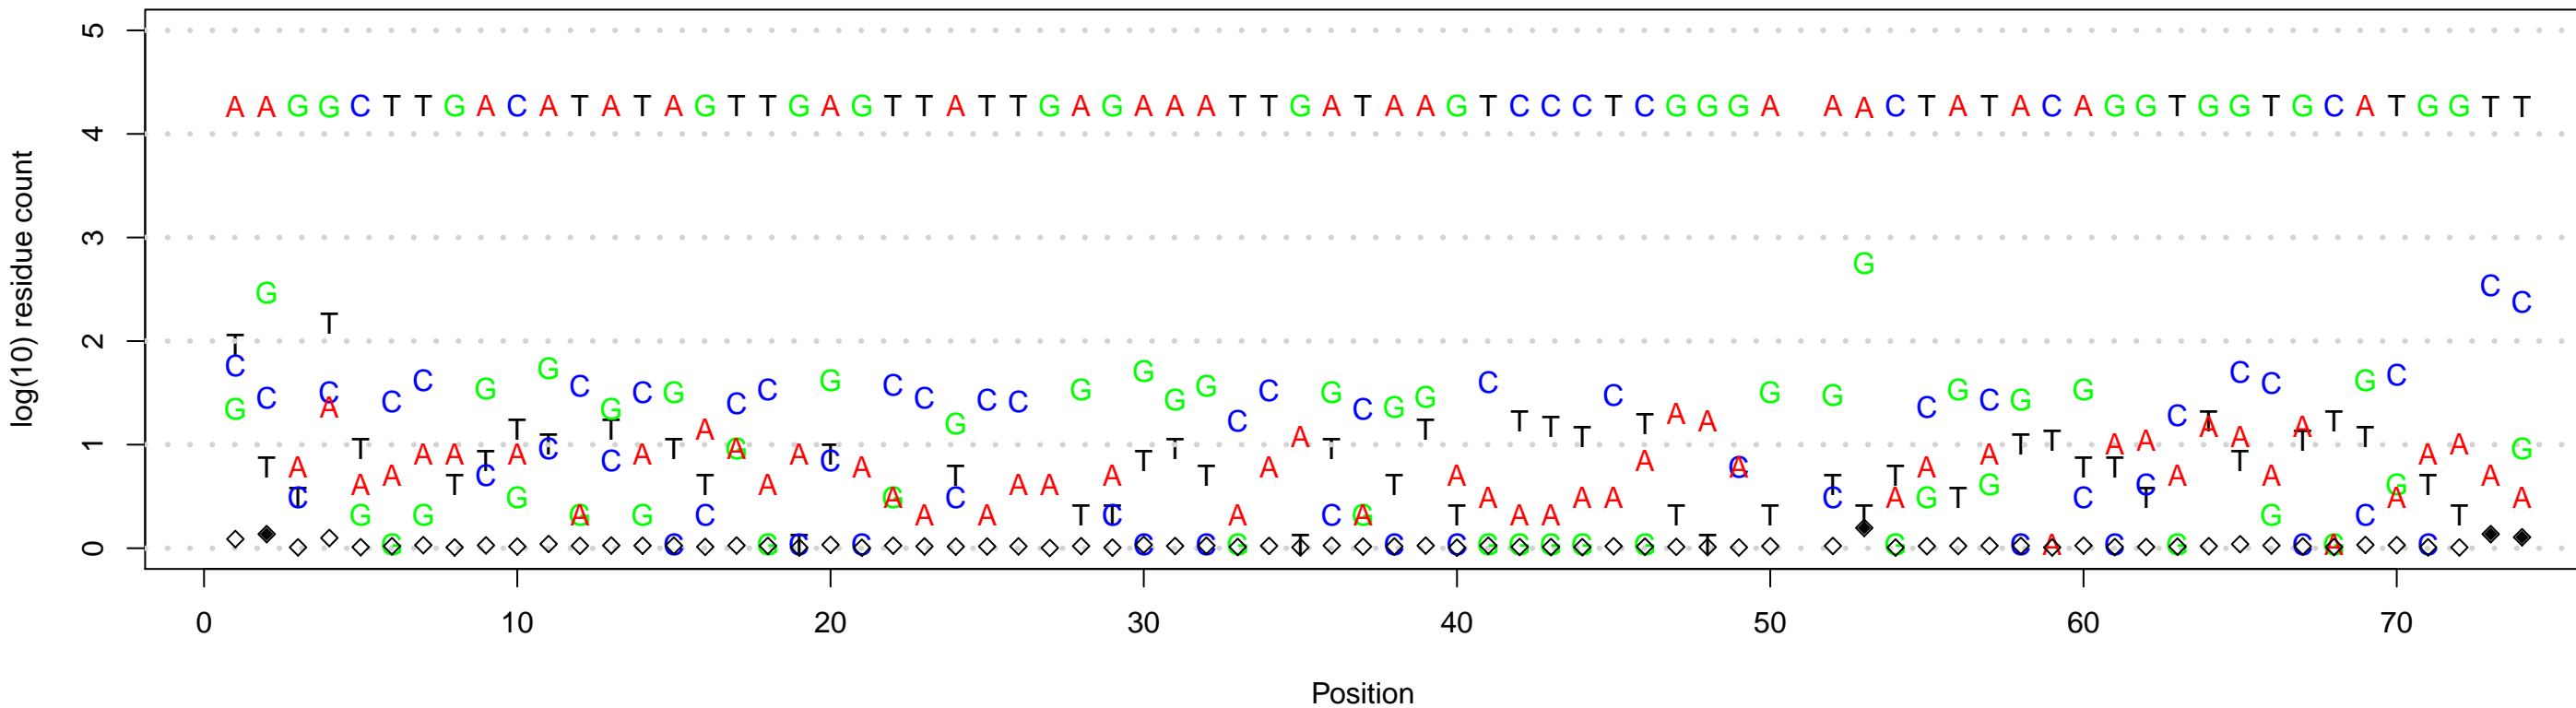

otu 26 0.4 3.9 1.7

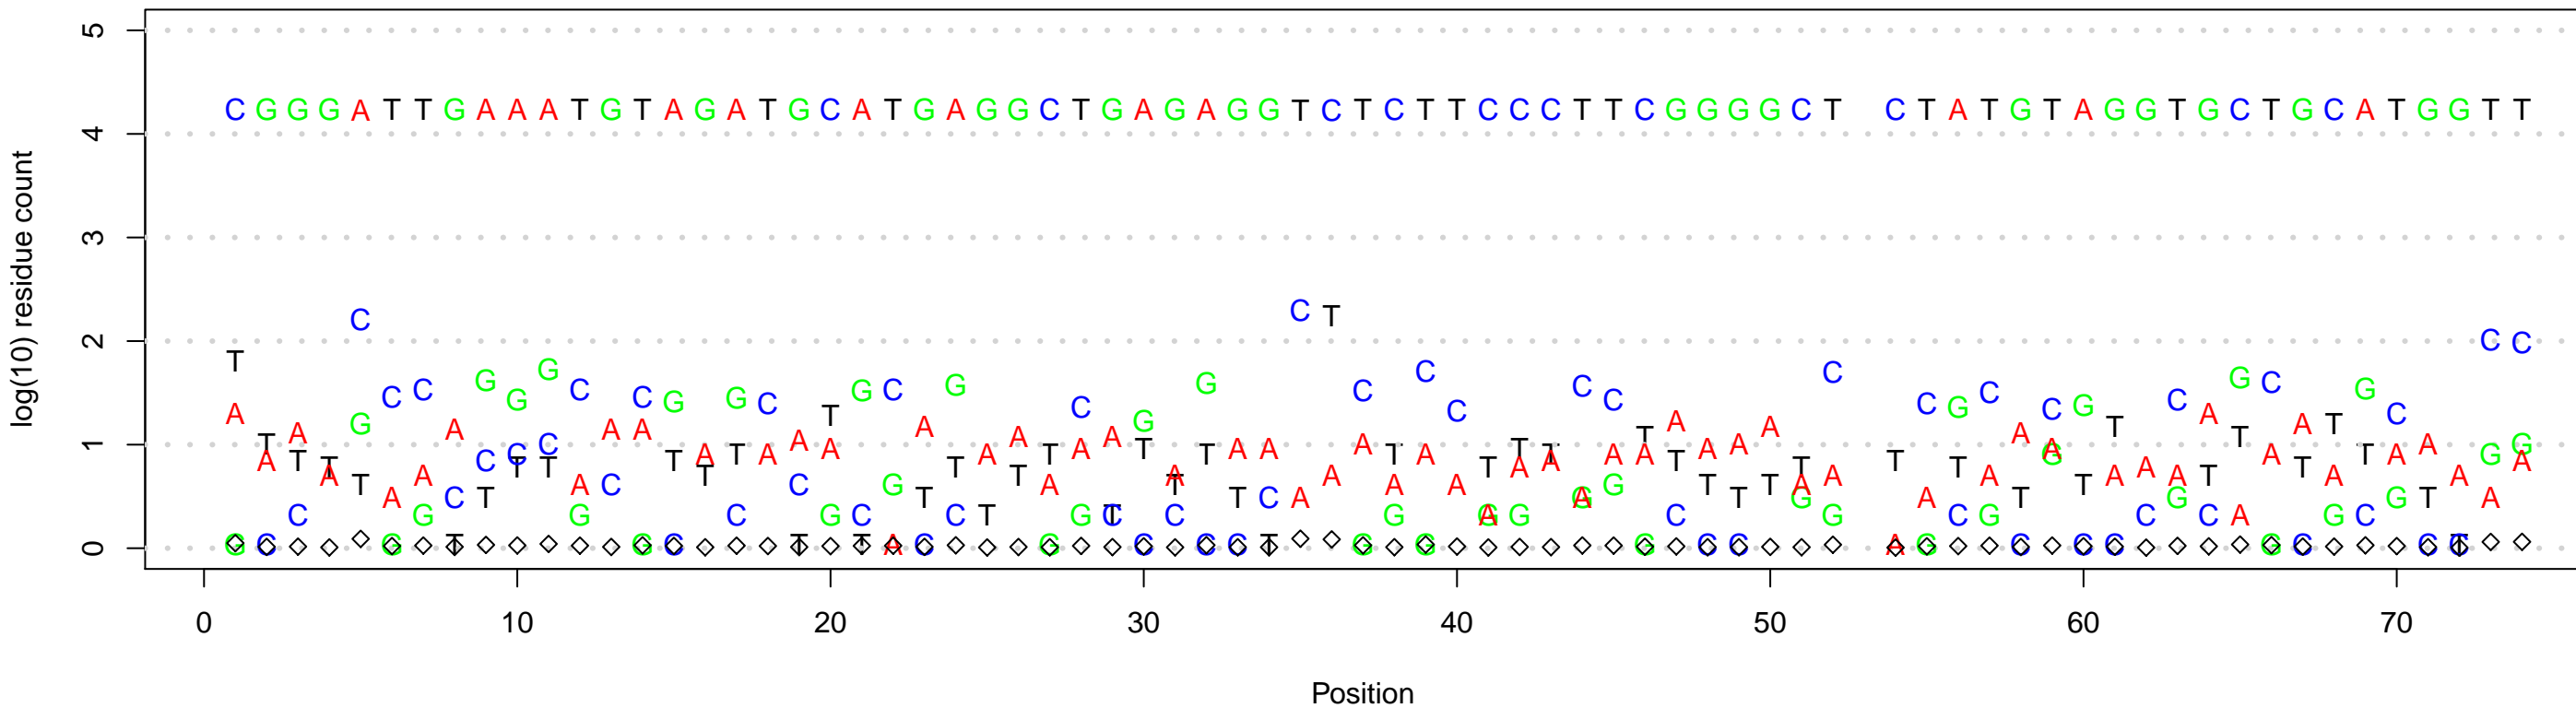

otu 27 0.8 4.7 4.8

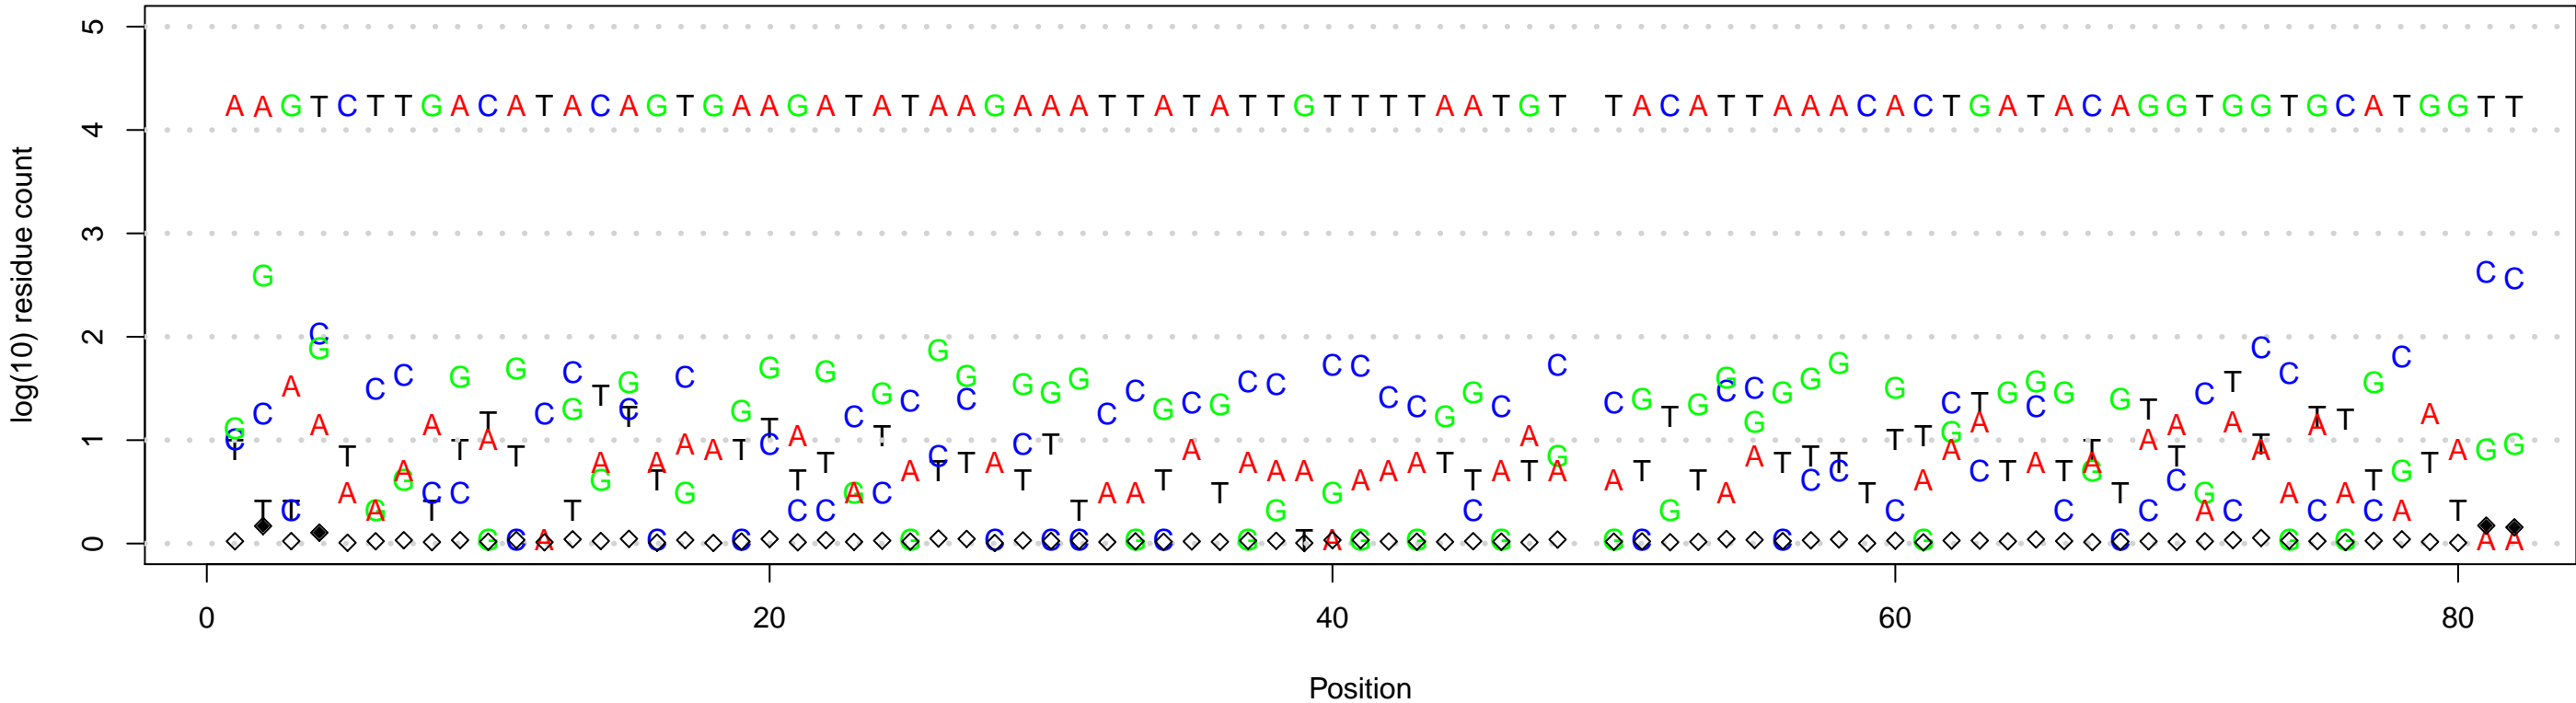

otu 28 1.1 5.8 4.0

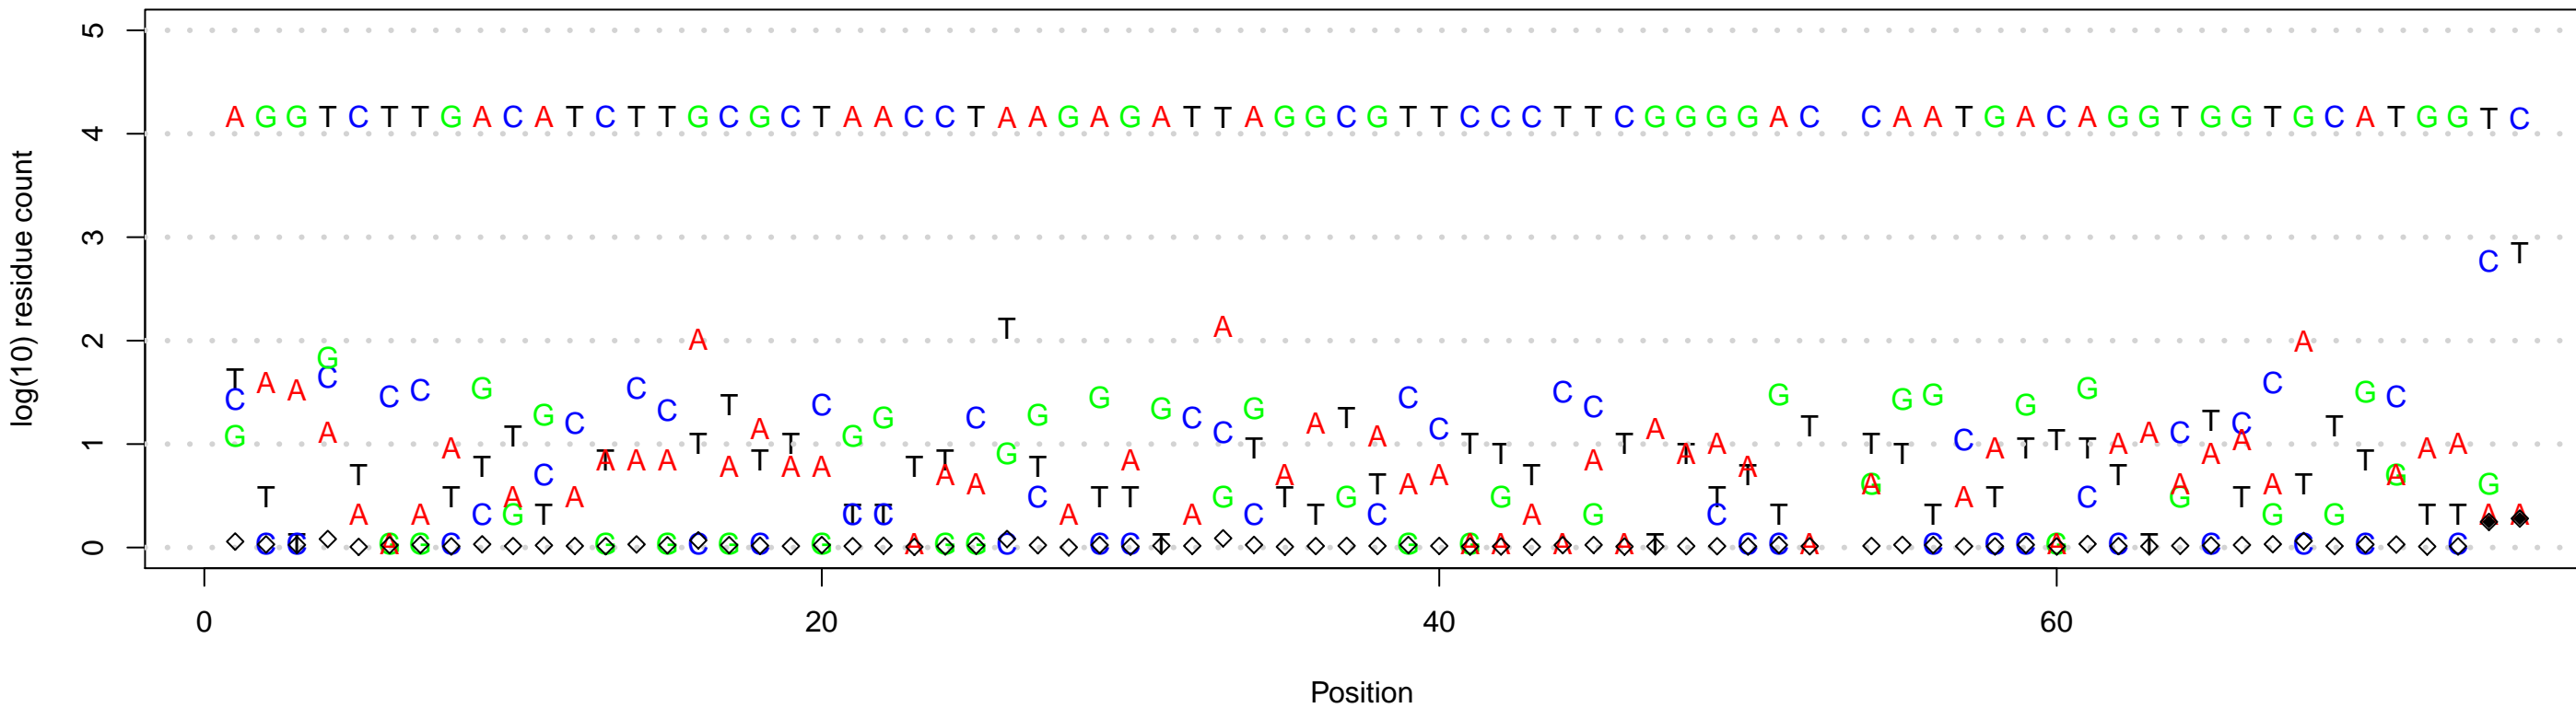

otu 29 2.6 5.3 3.4

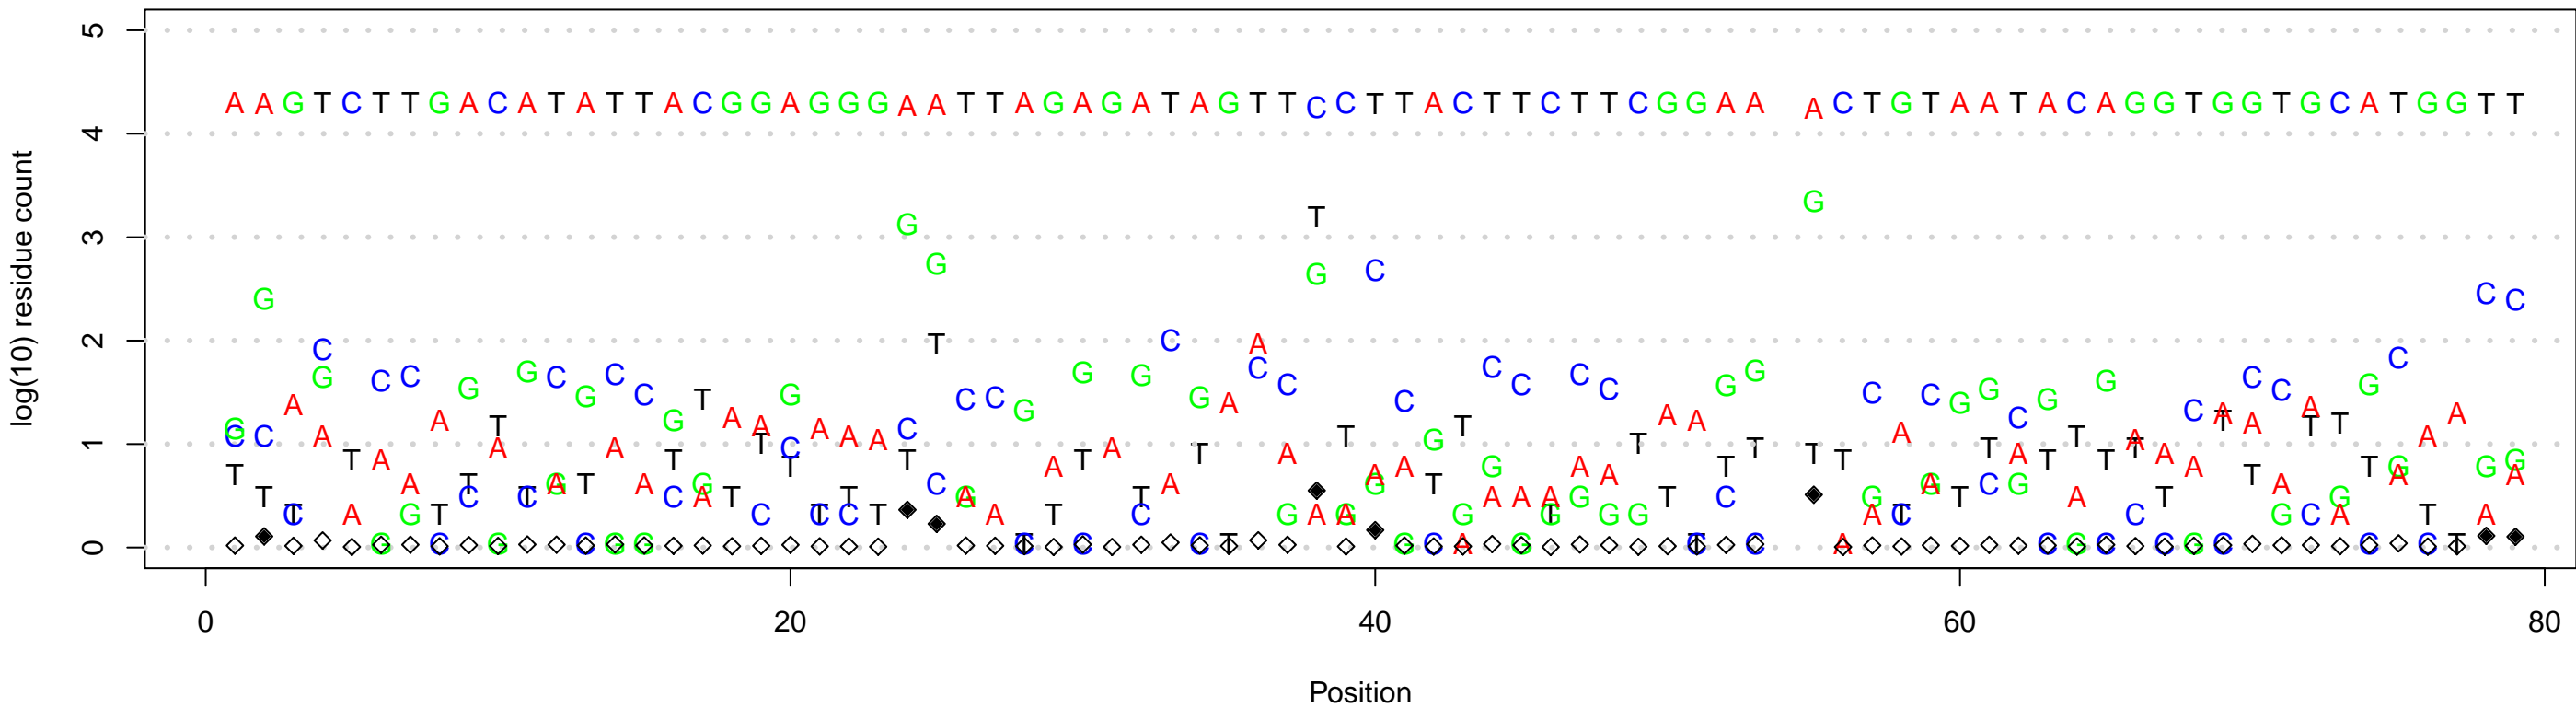

otu 30 0.4 5.0 3.9

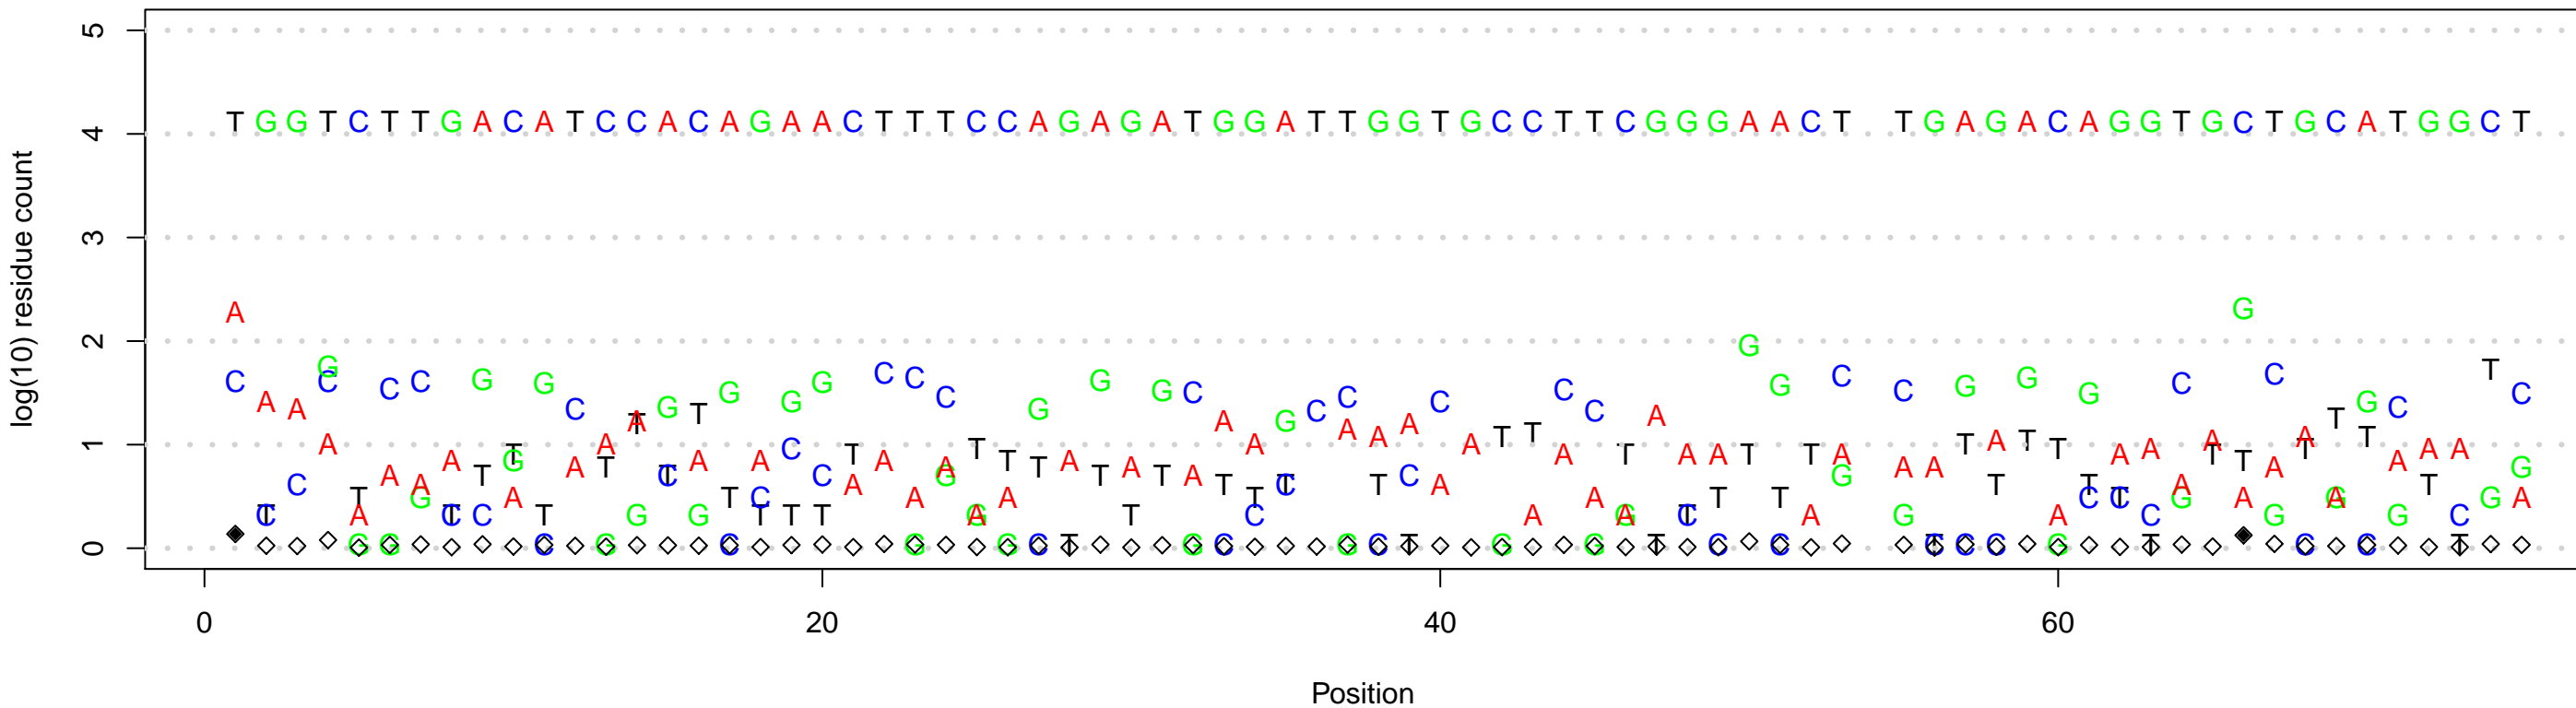

otu 31 1.2 7.9 9.7

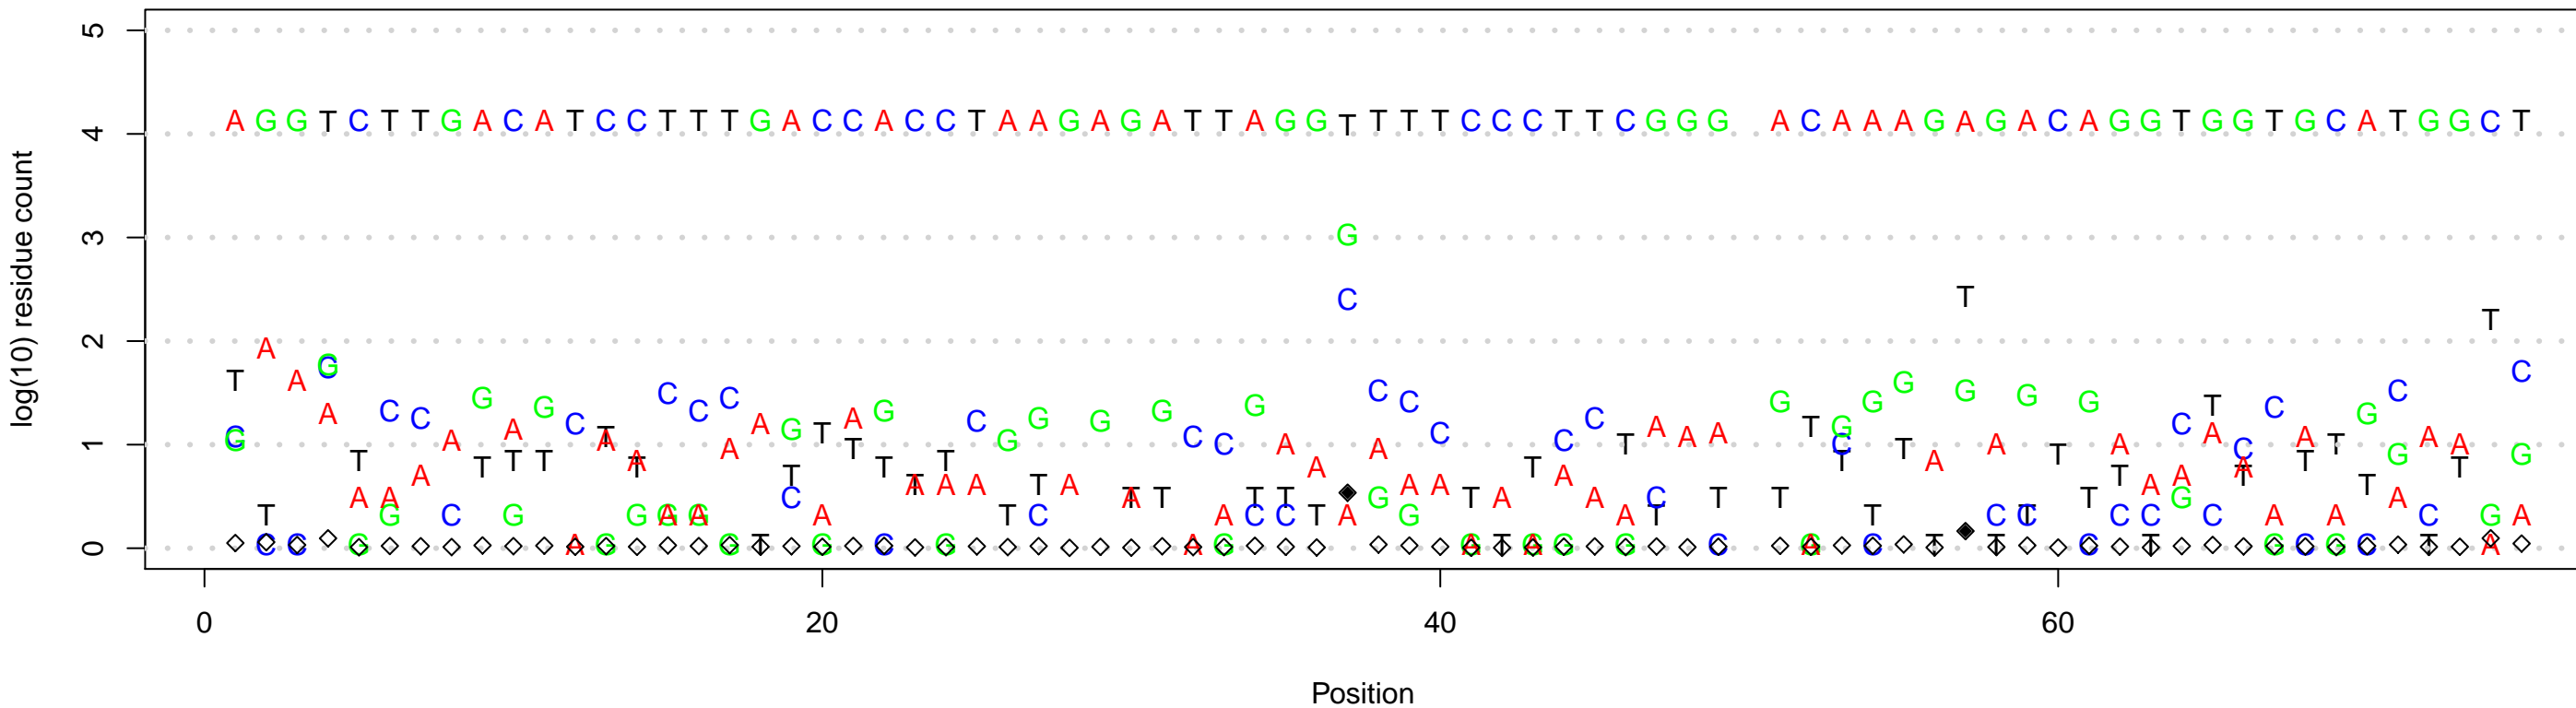



otu 32 1.4 4.5 1.6

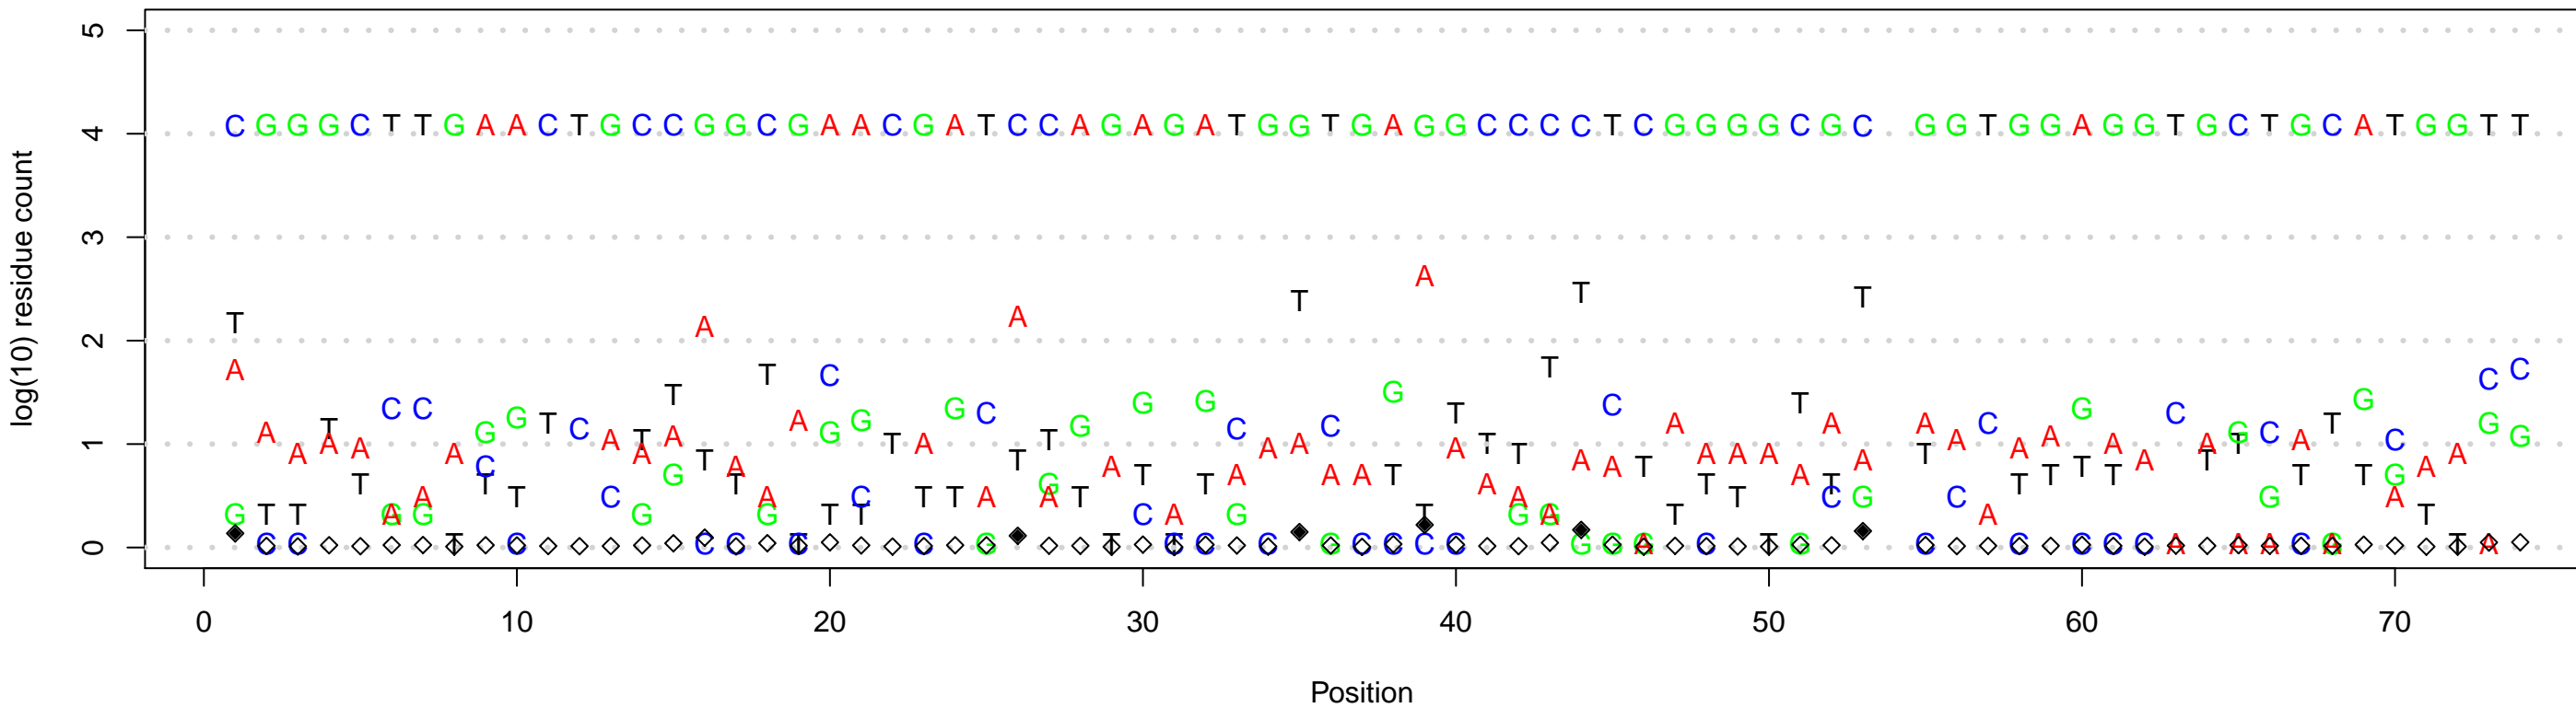

otu 33 1.0 5.3 3.8

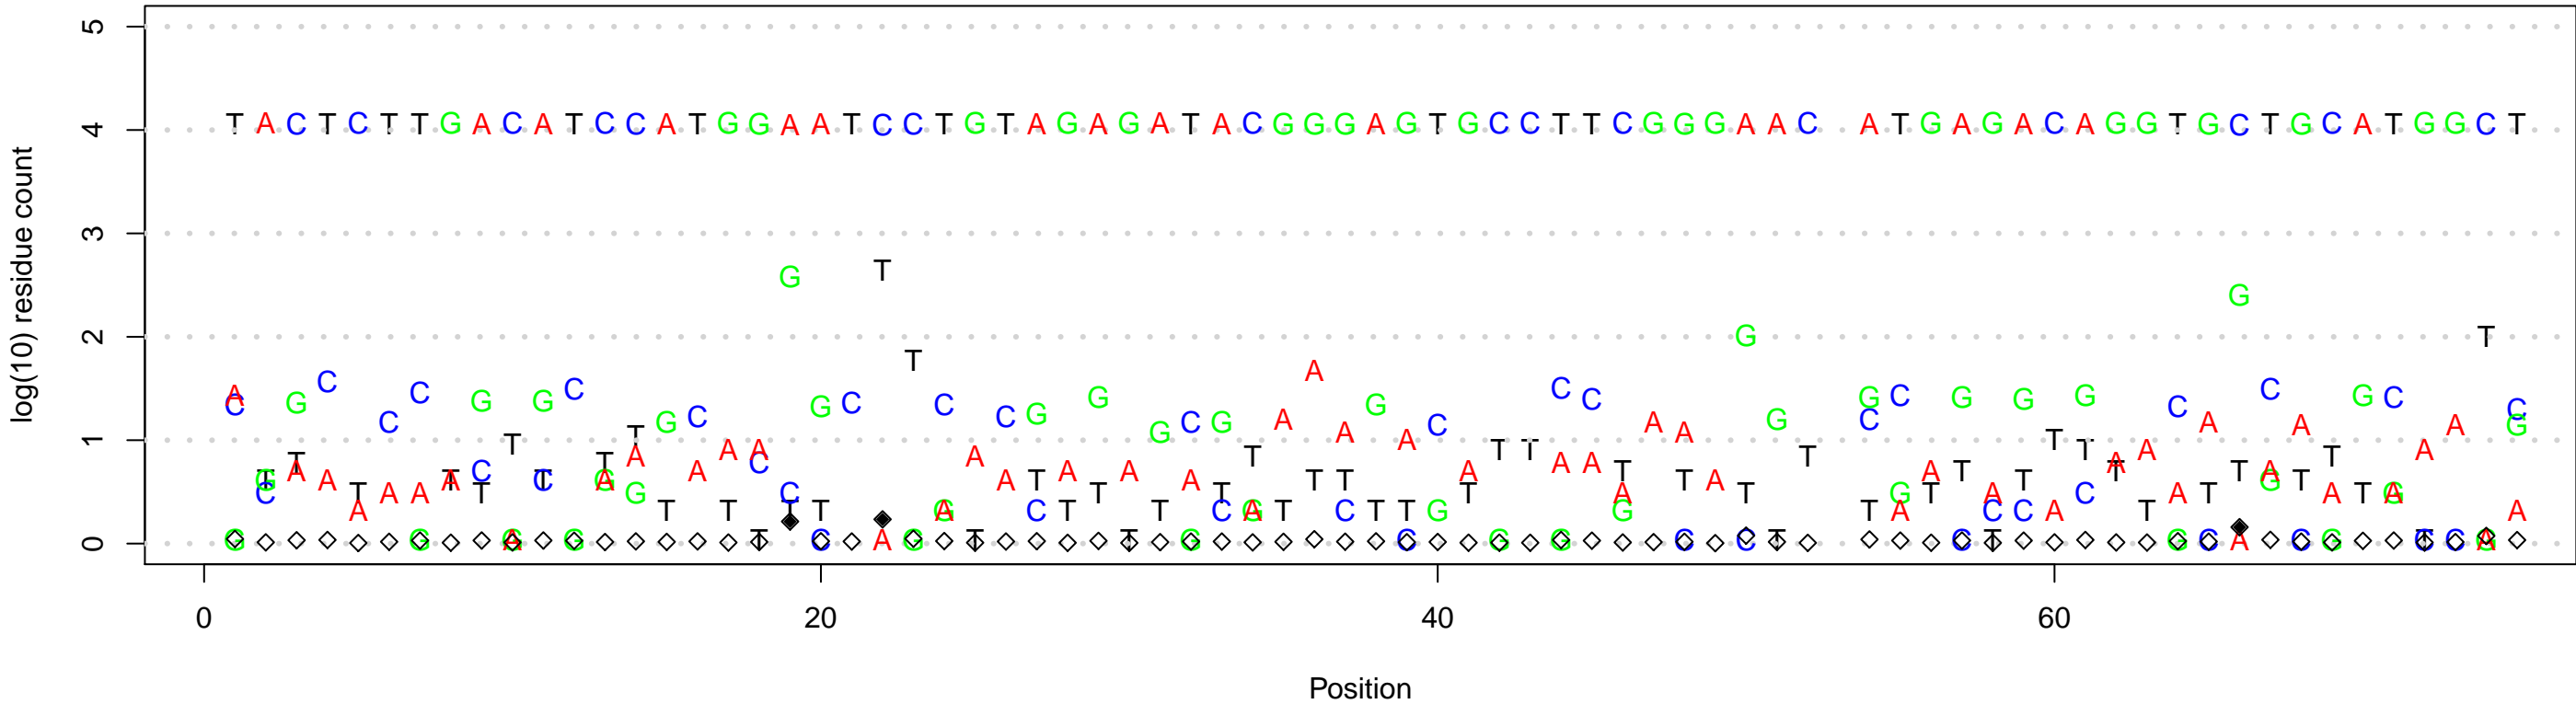



otu 35 1.0 6.0 3.7

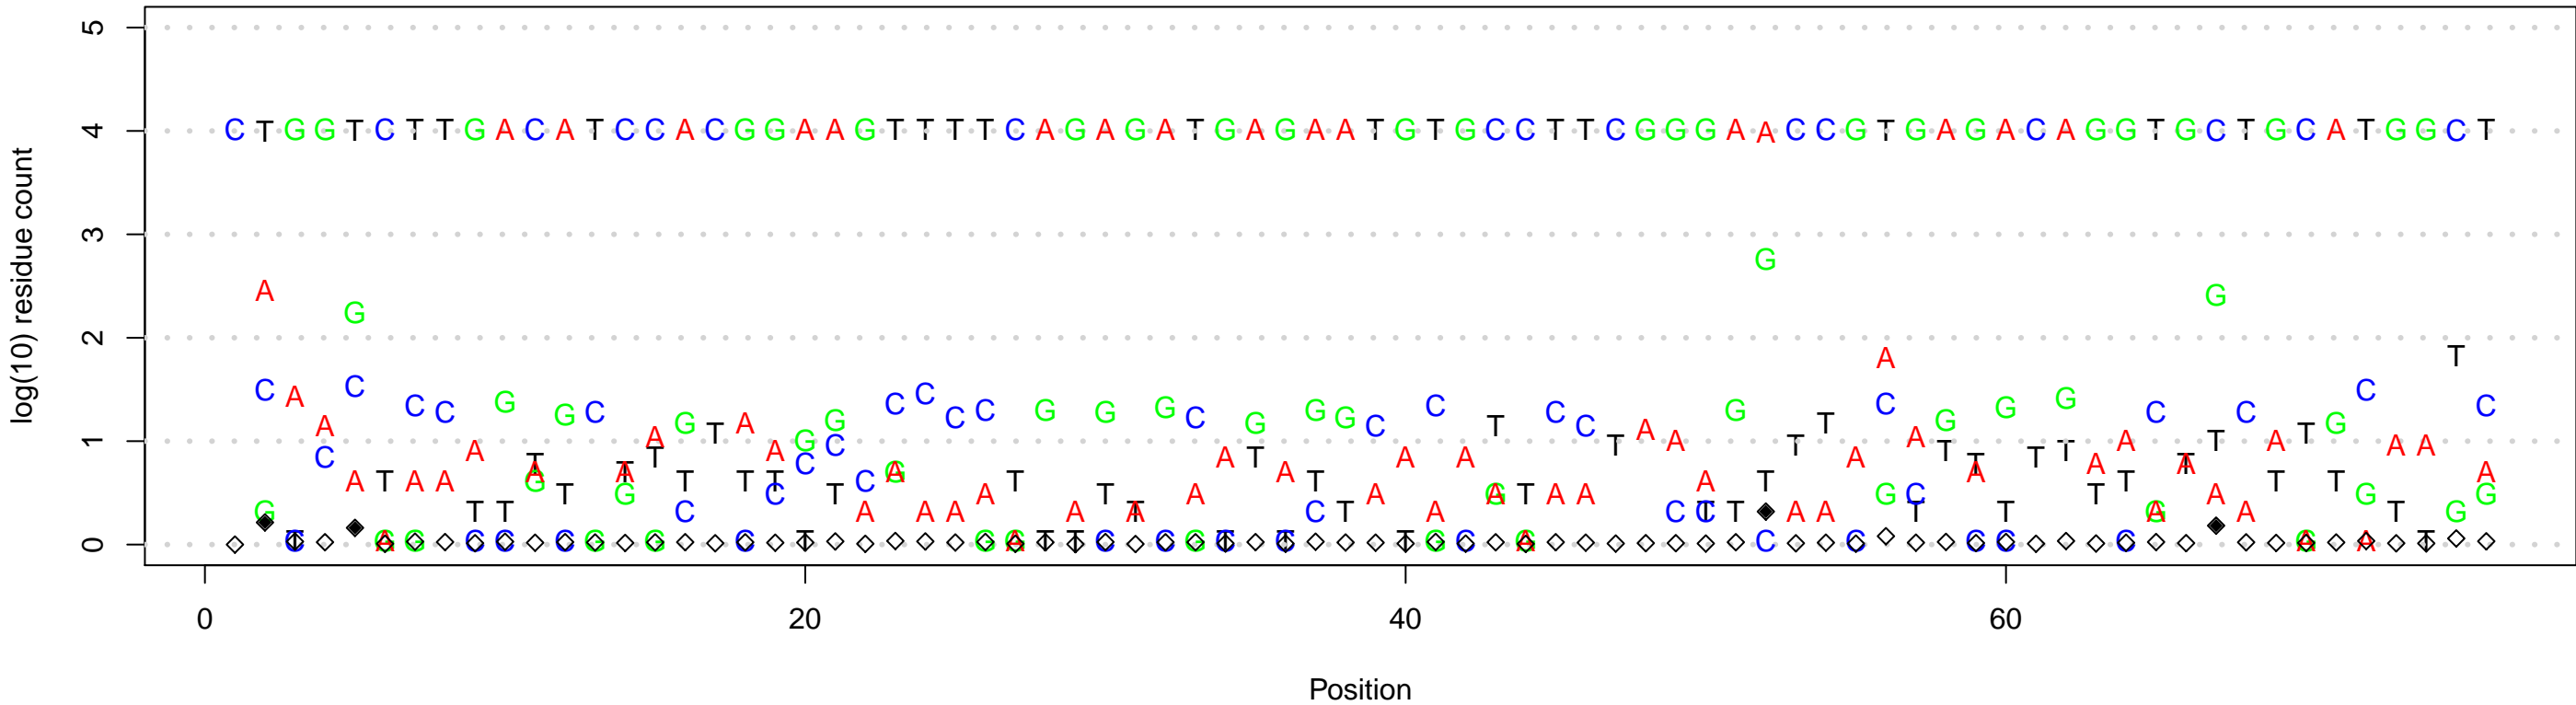

otu 36 1.5 7.7 6.4

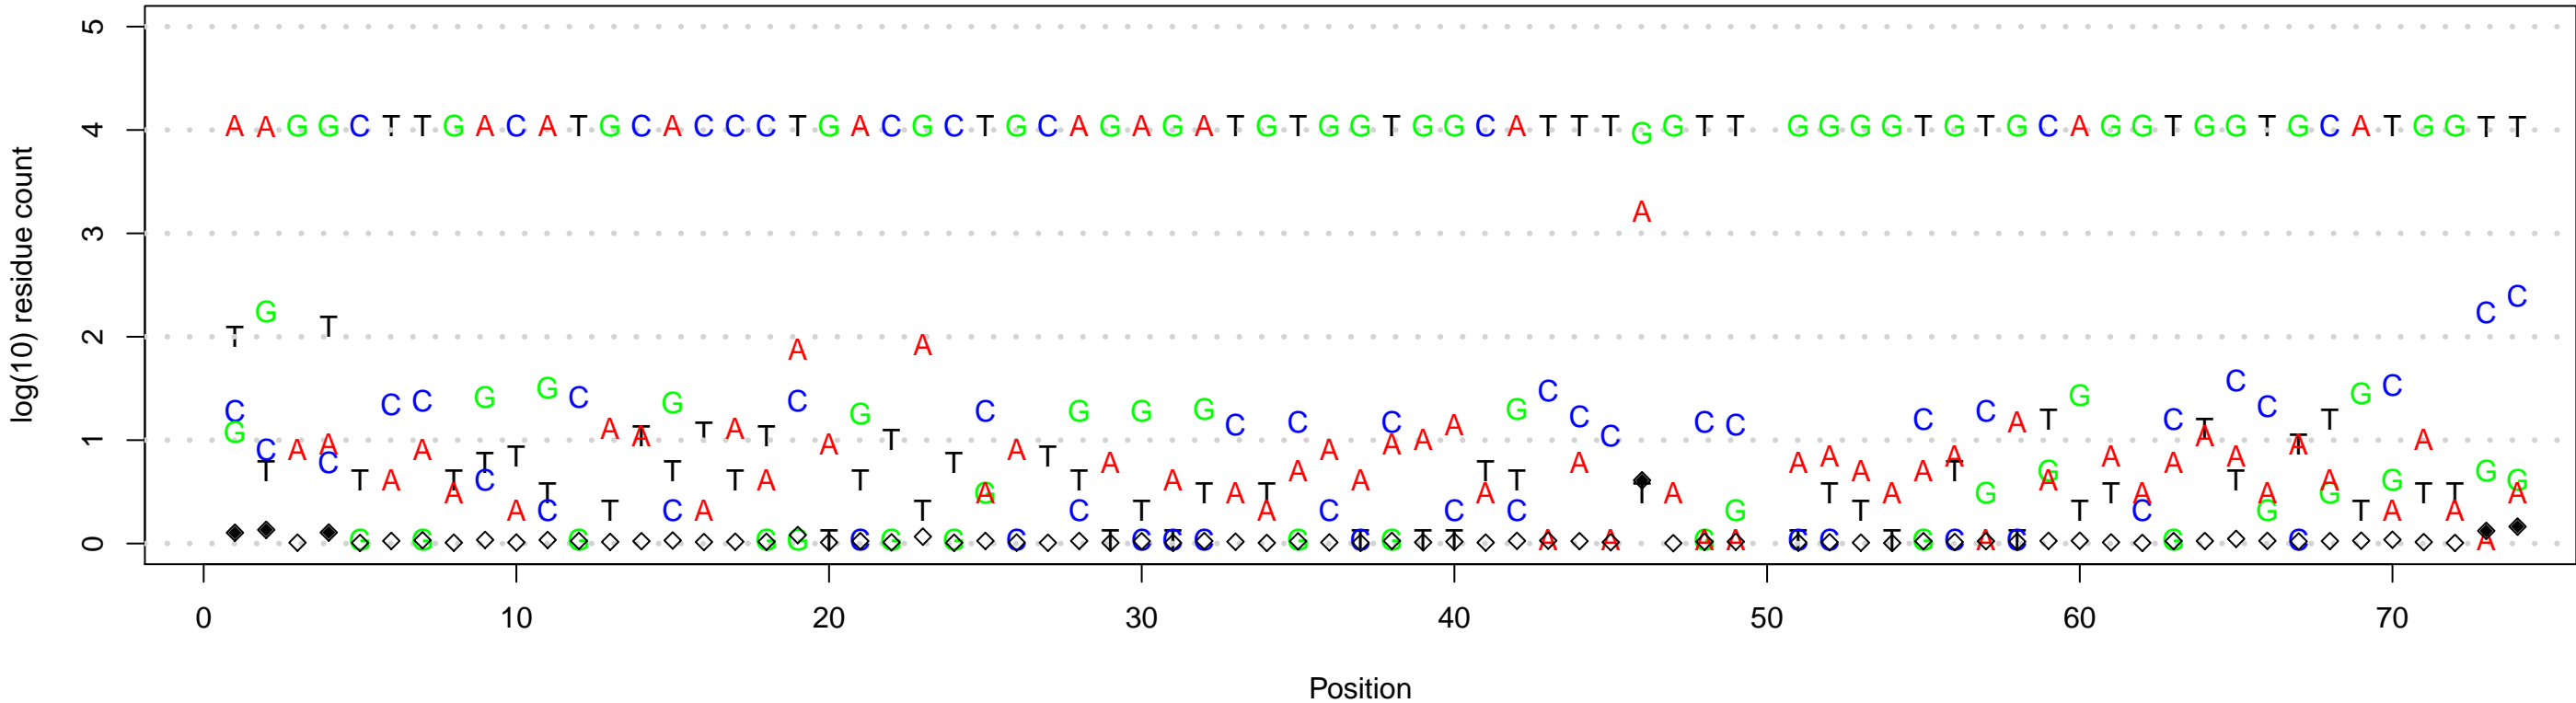

otu 37 0.4 5.9 4.6

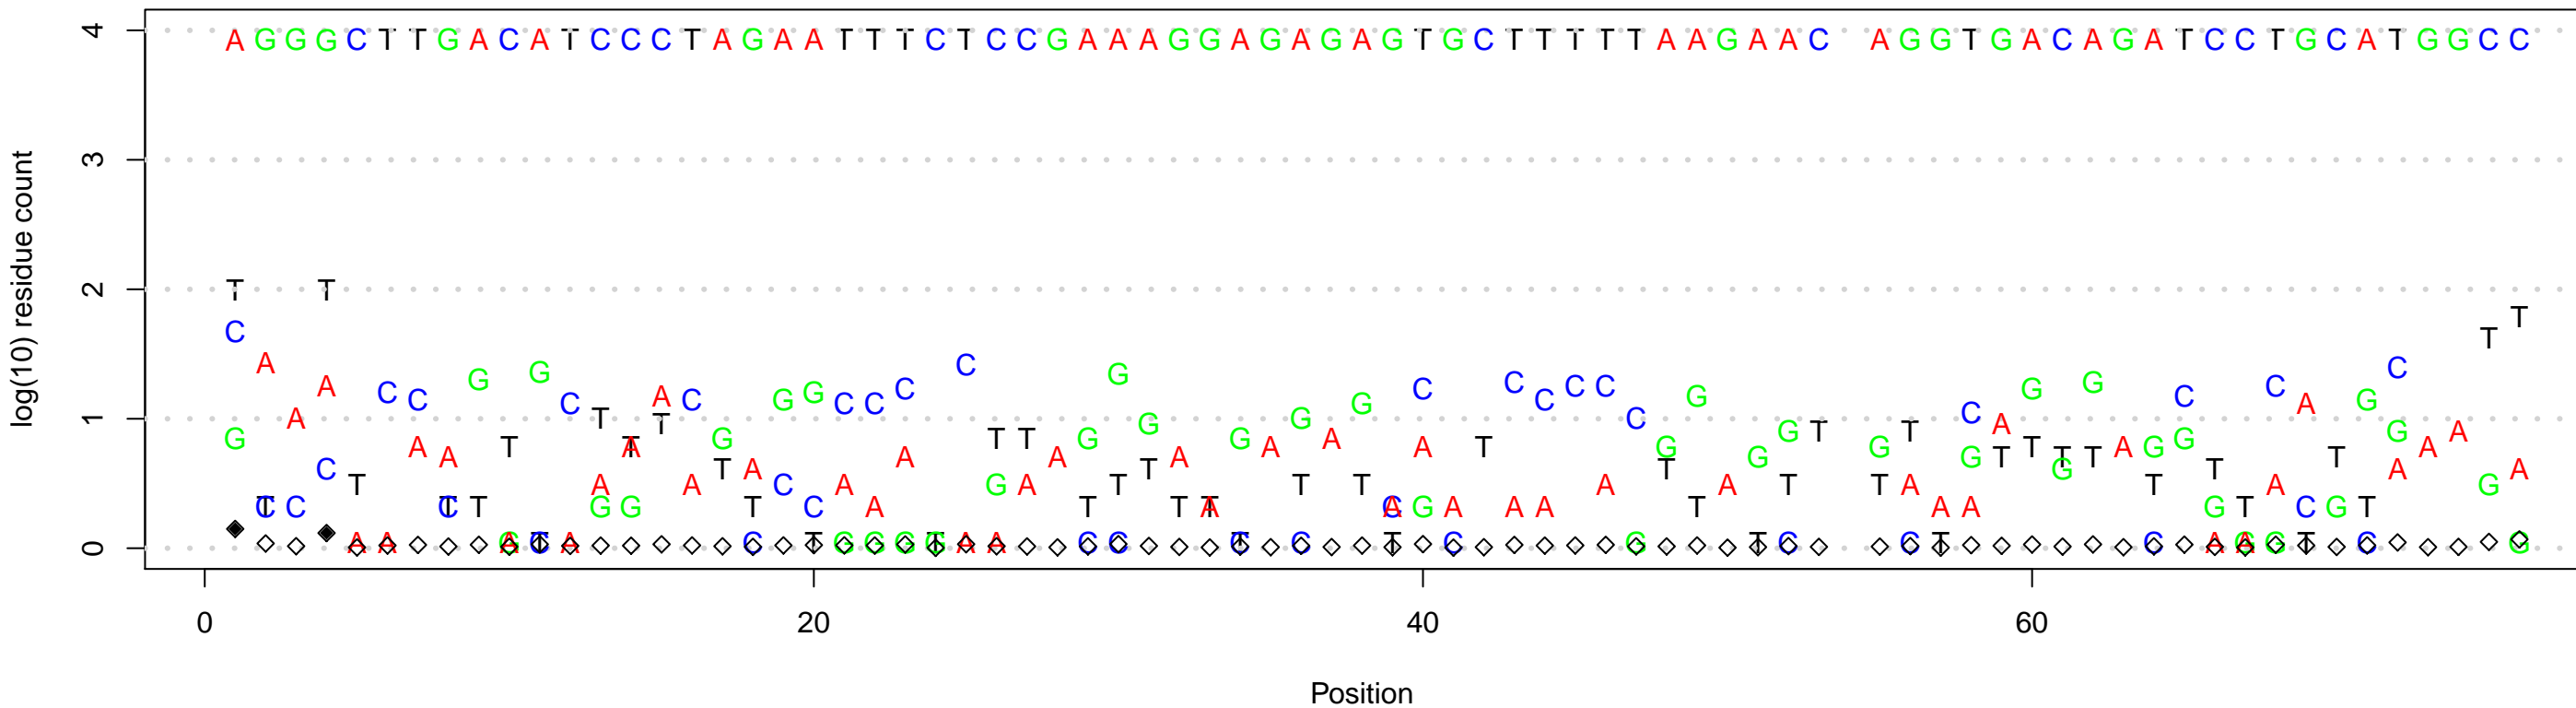

otu 38 0.2 6.4 4.4

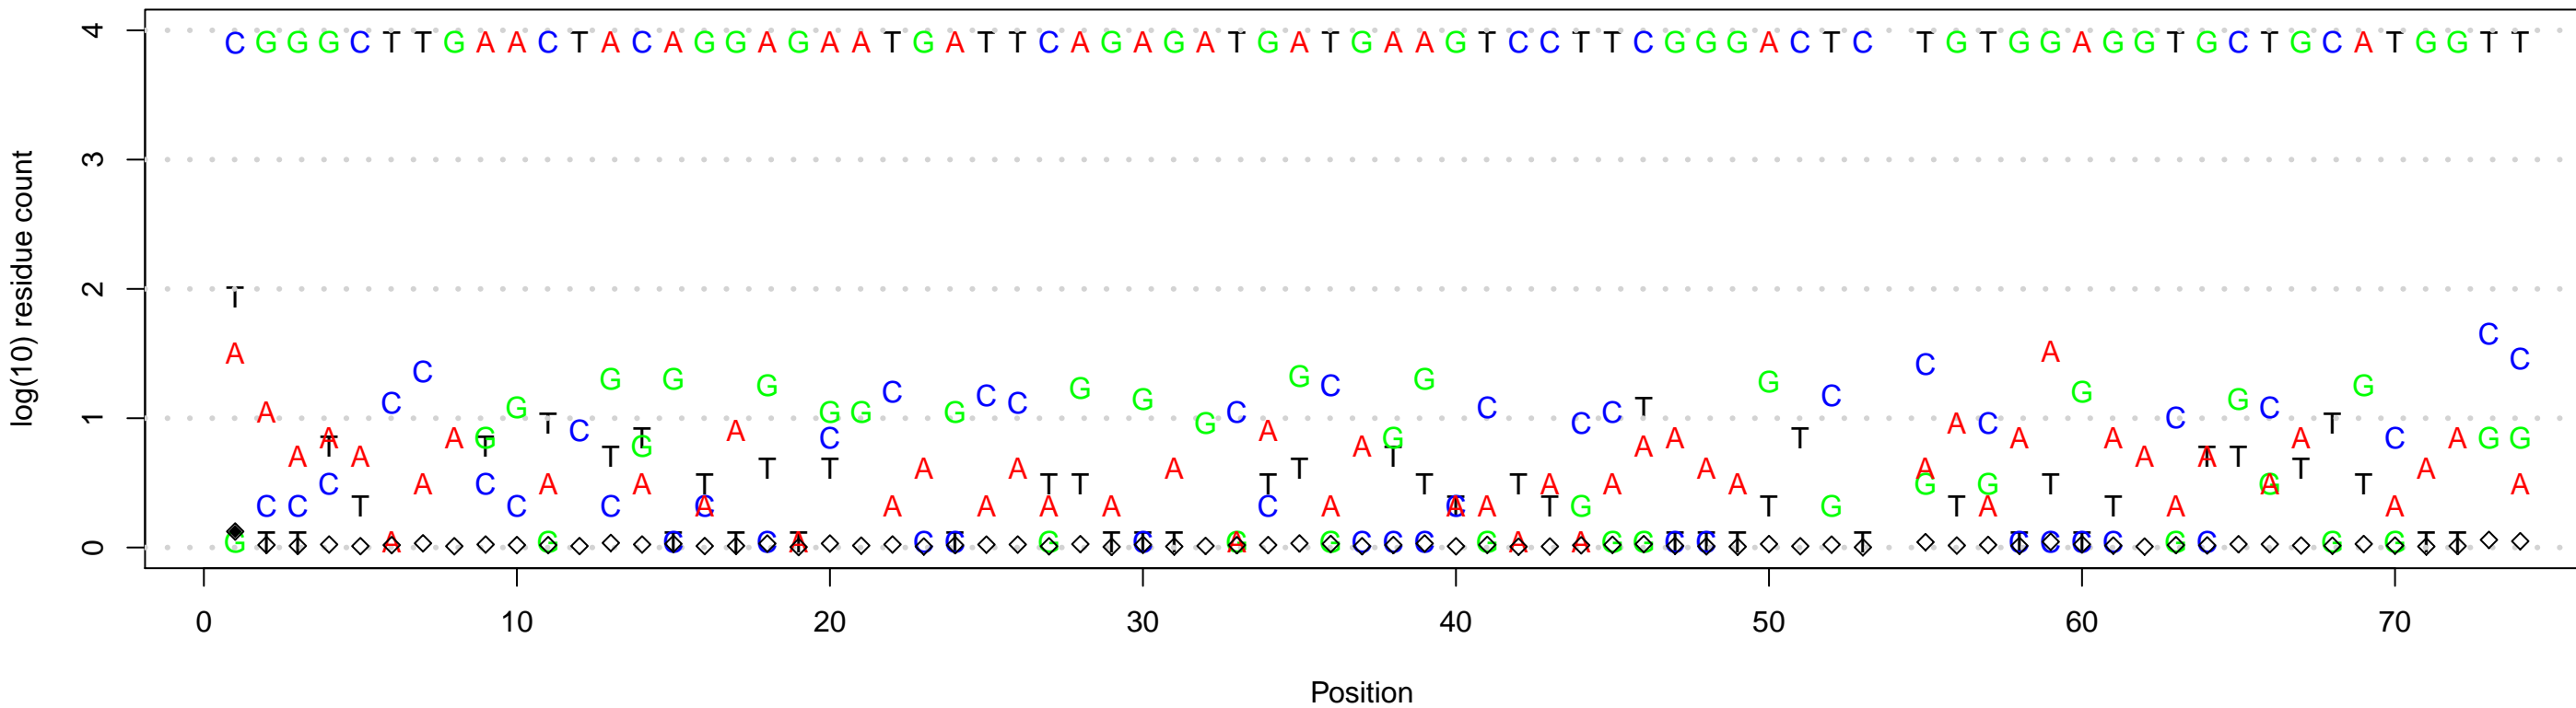

otu 39 1.1 6.3 3.5

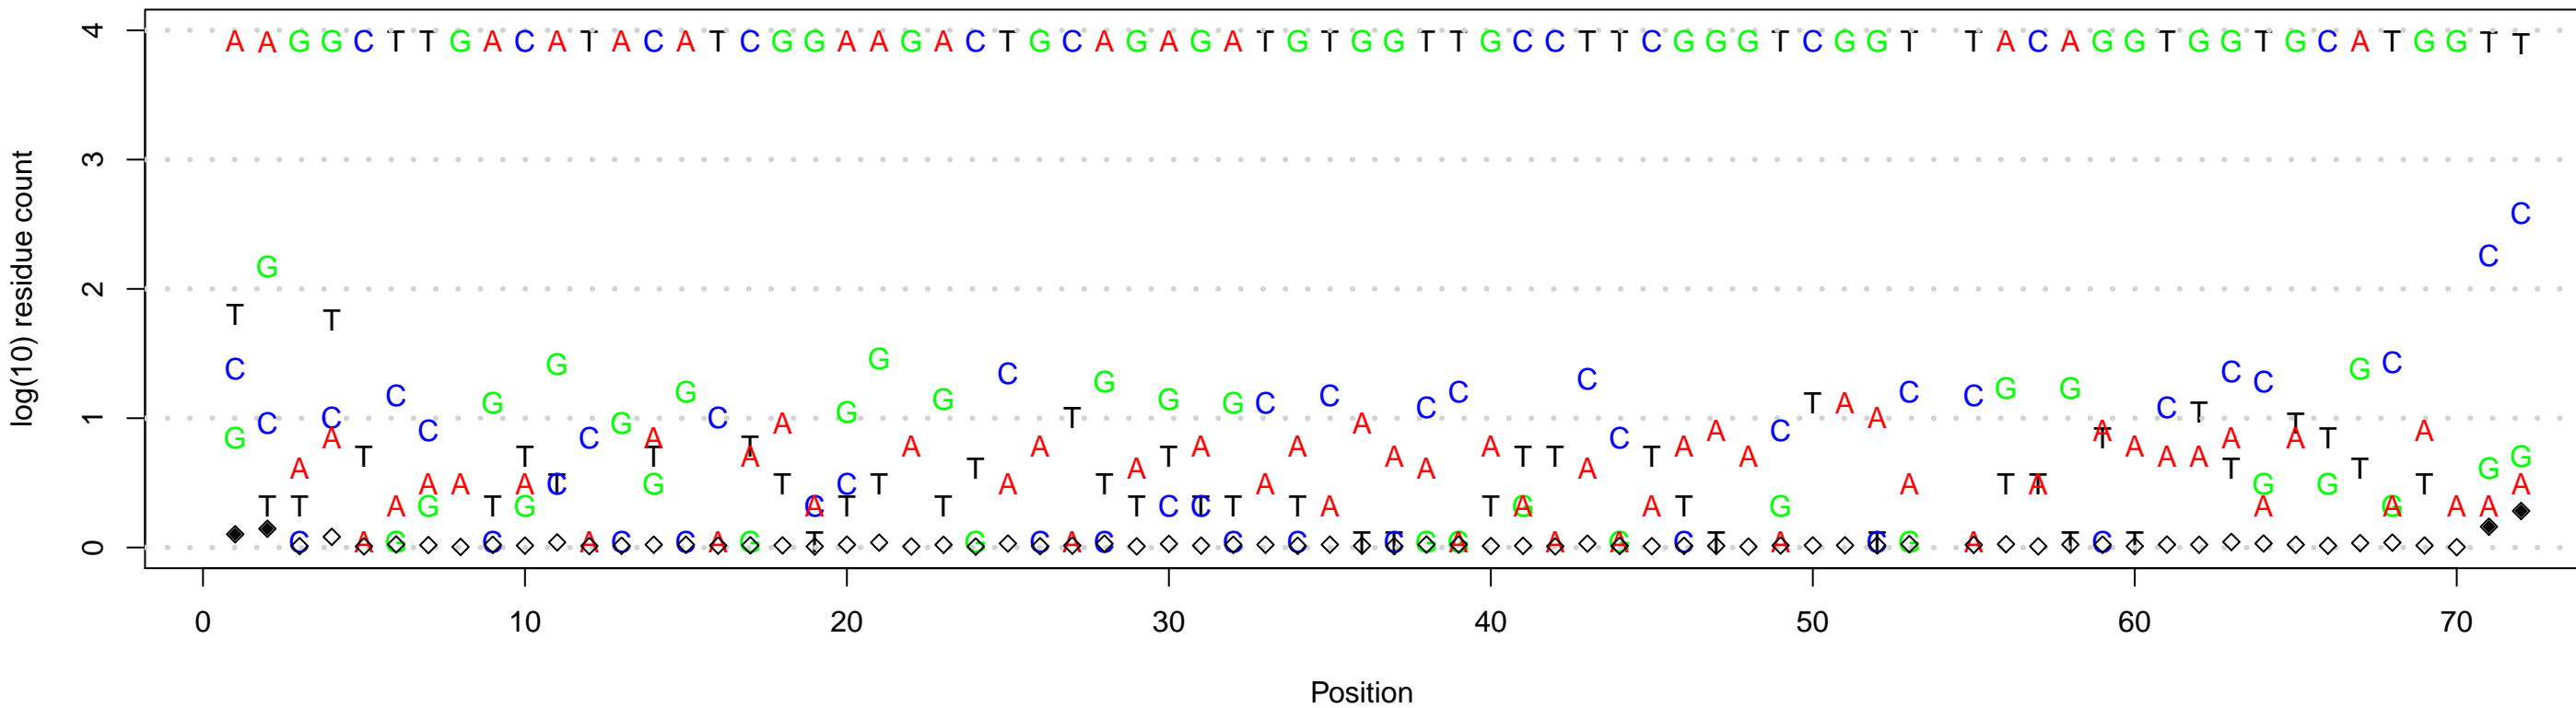



otu 41 1.4 8.6 23.1

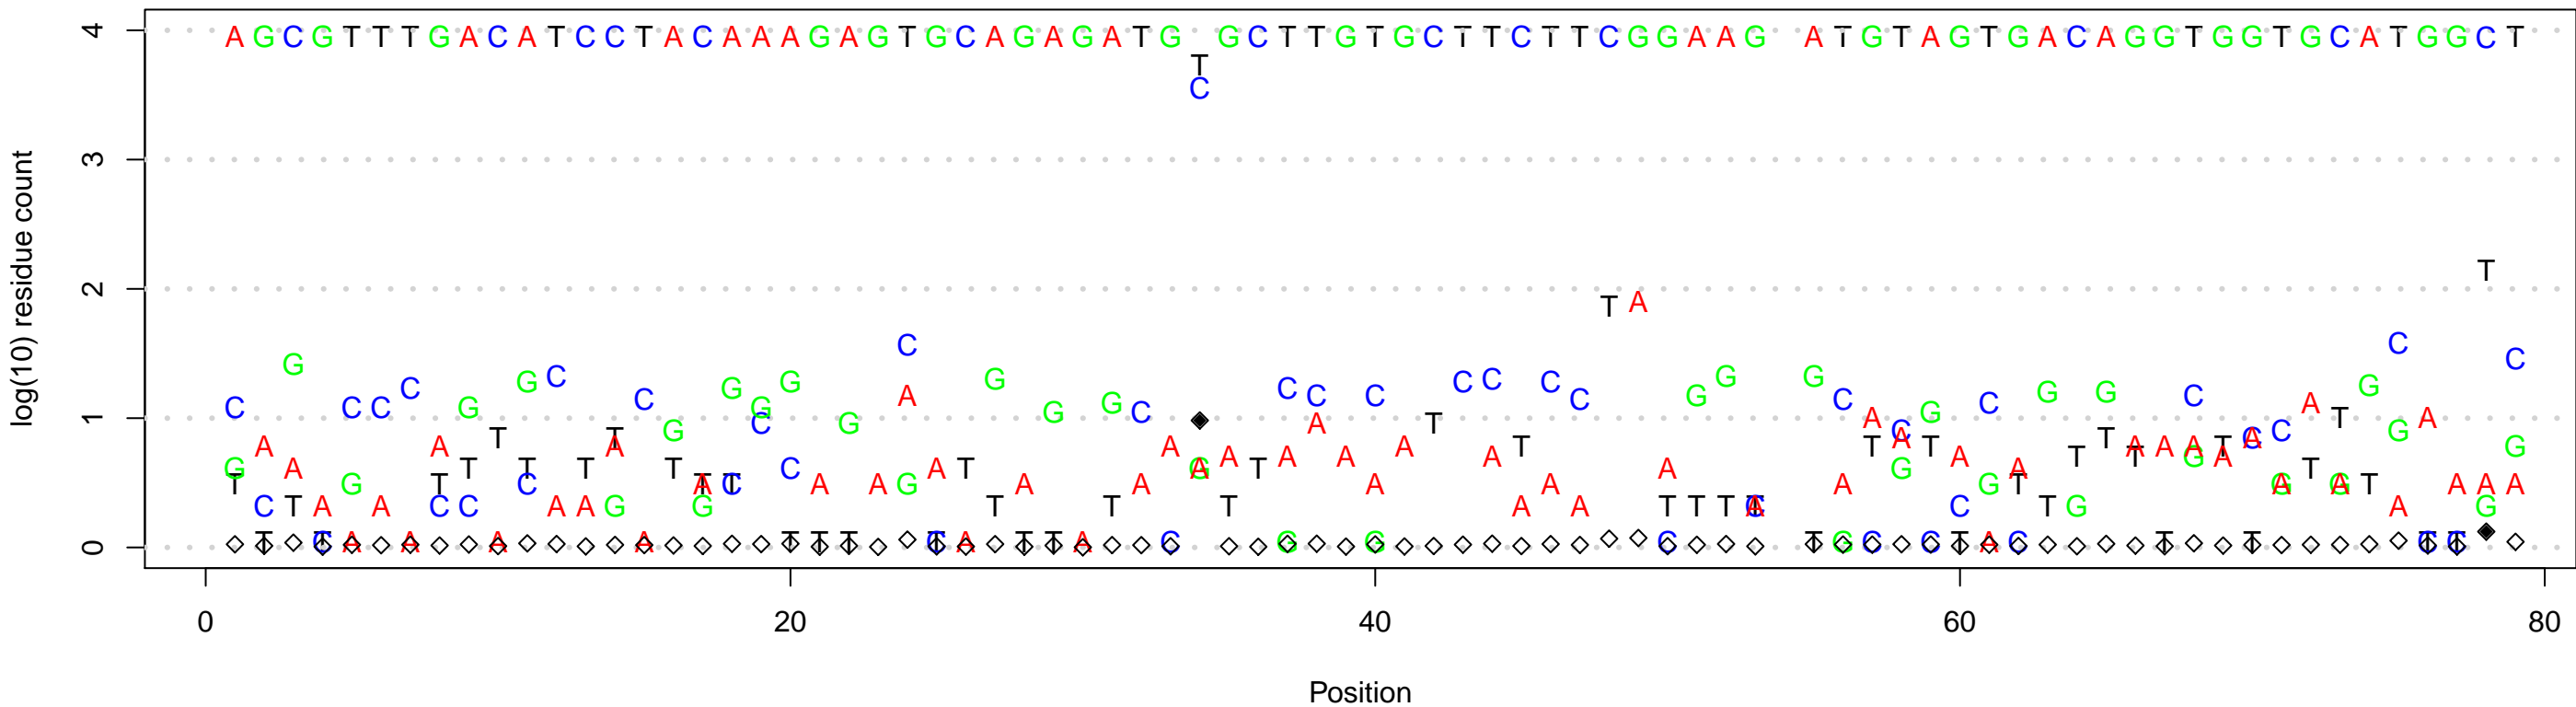

otu 42 0.4 6.0 4.4

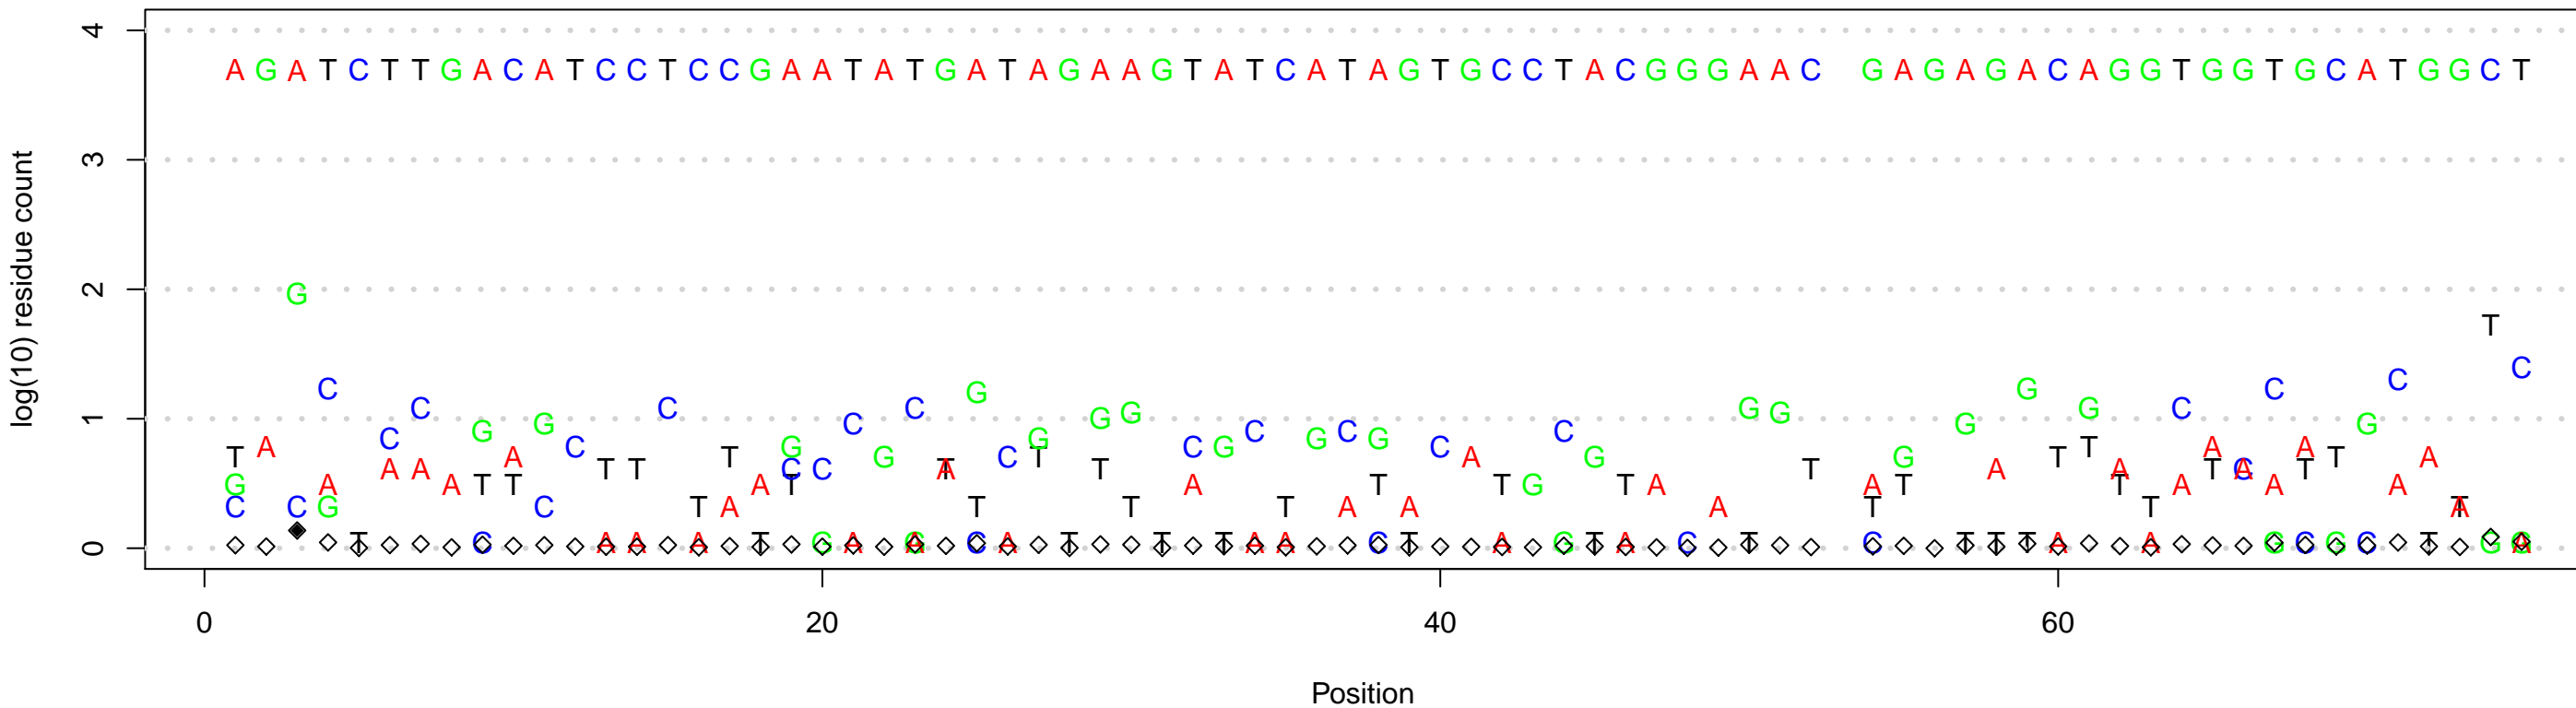

otu 44 0.7 4.8 2.4

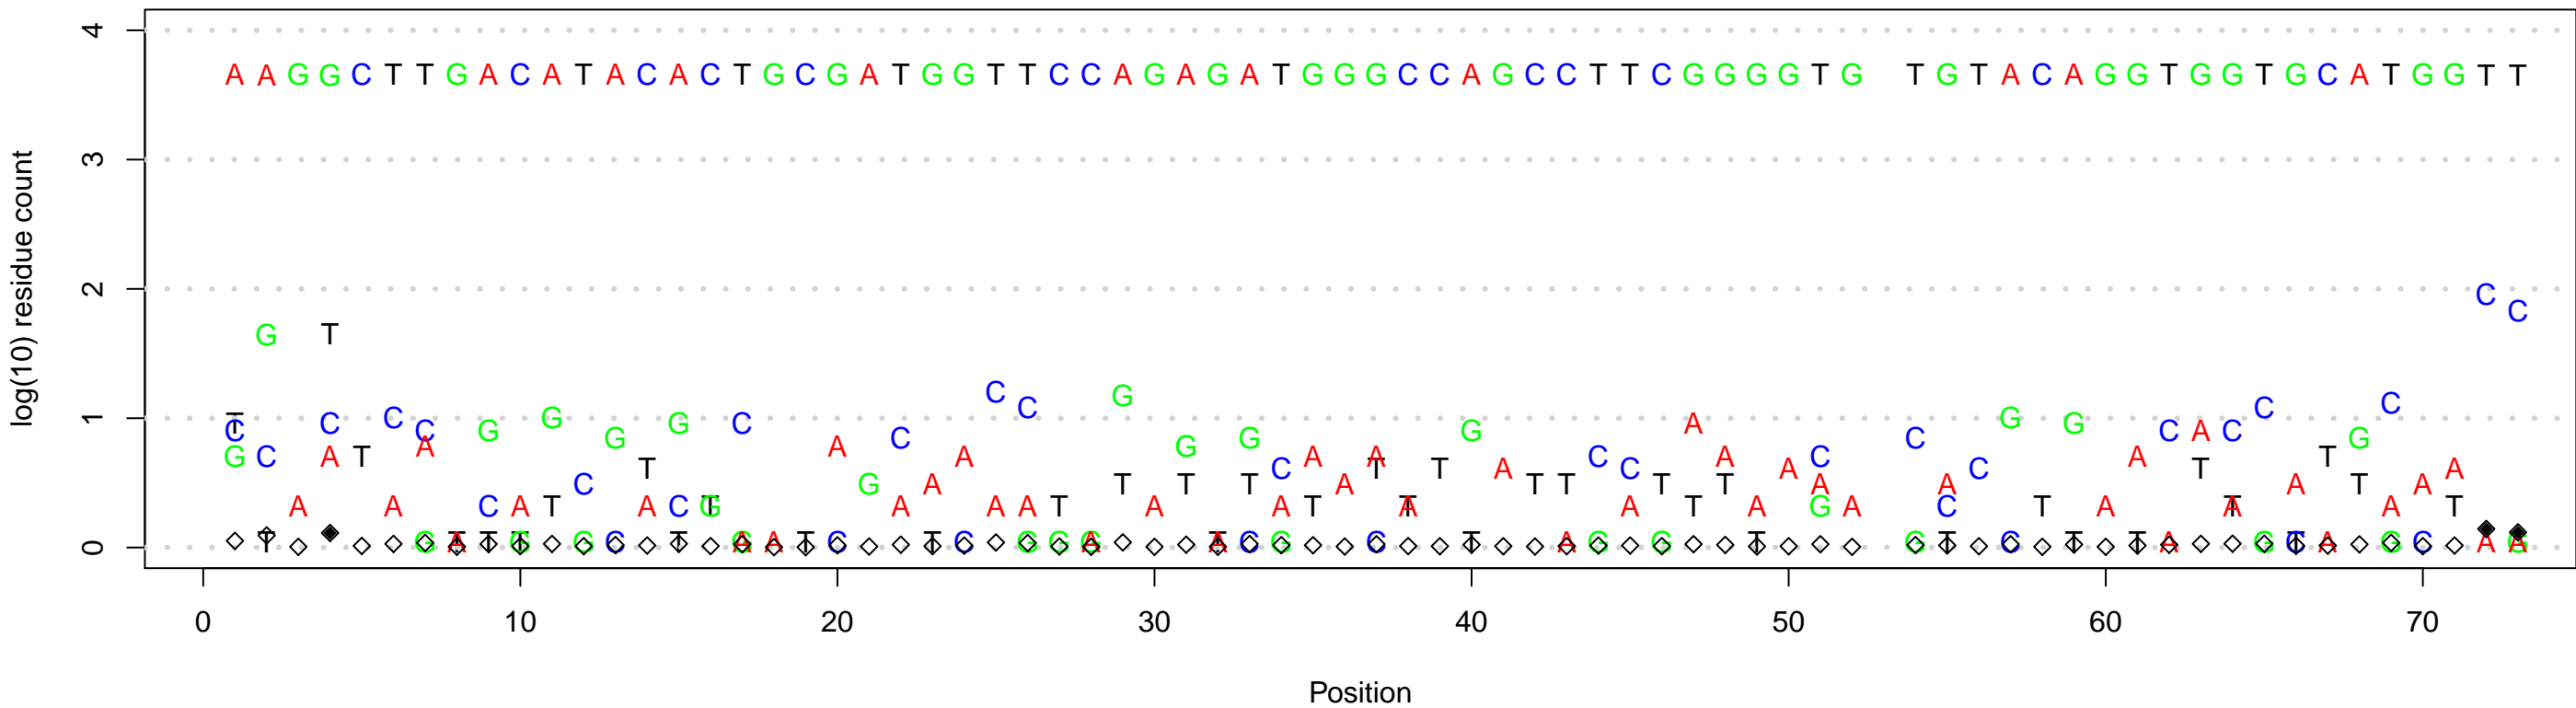

otu 45 0.9 5.0 3.2

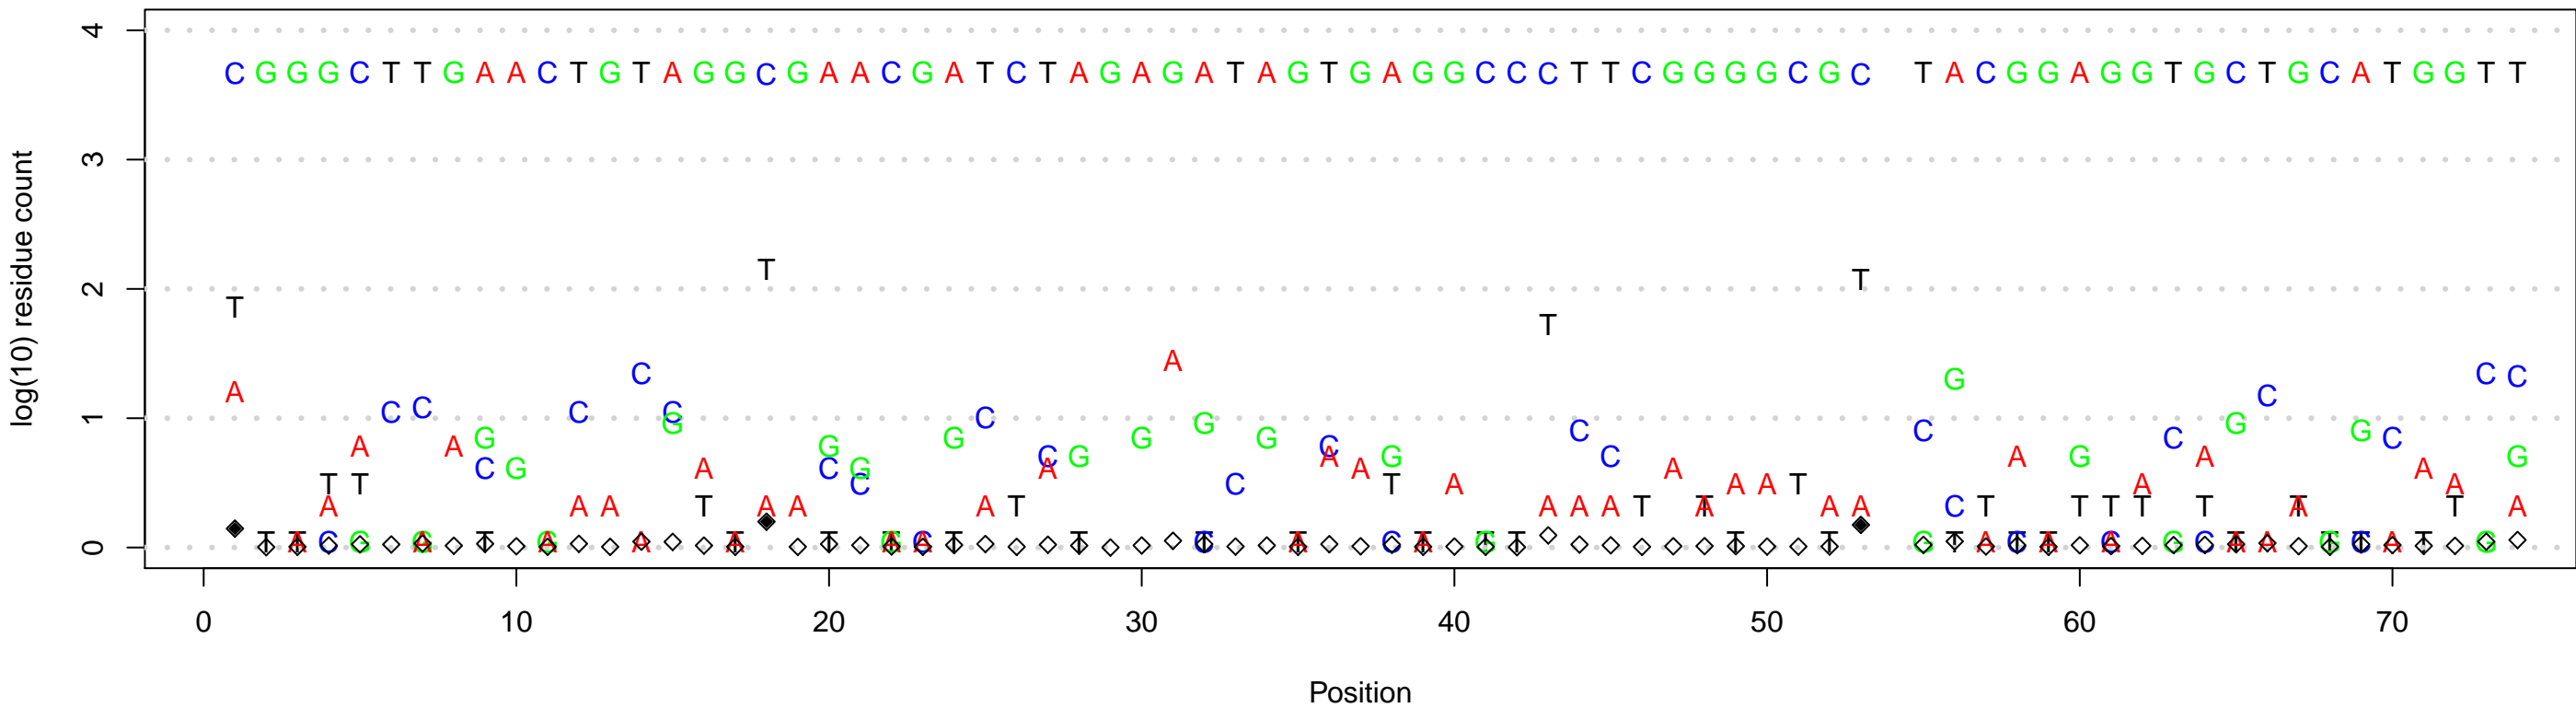

otu 46 3.6 6.2 3.7

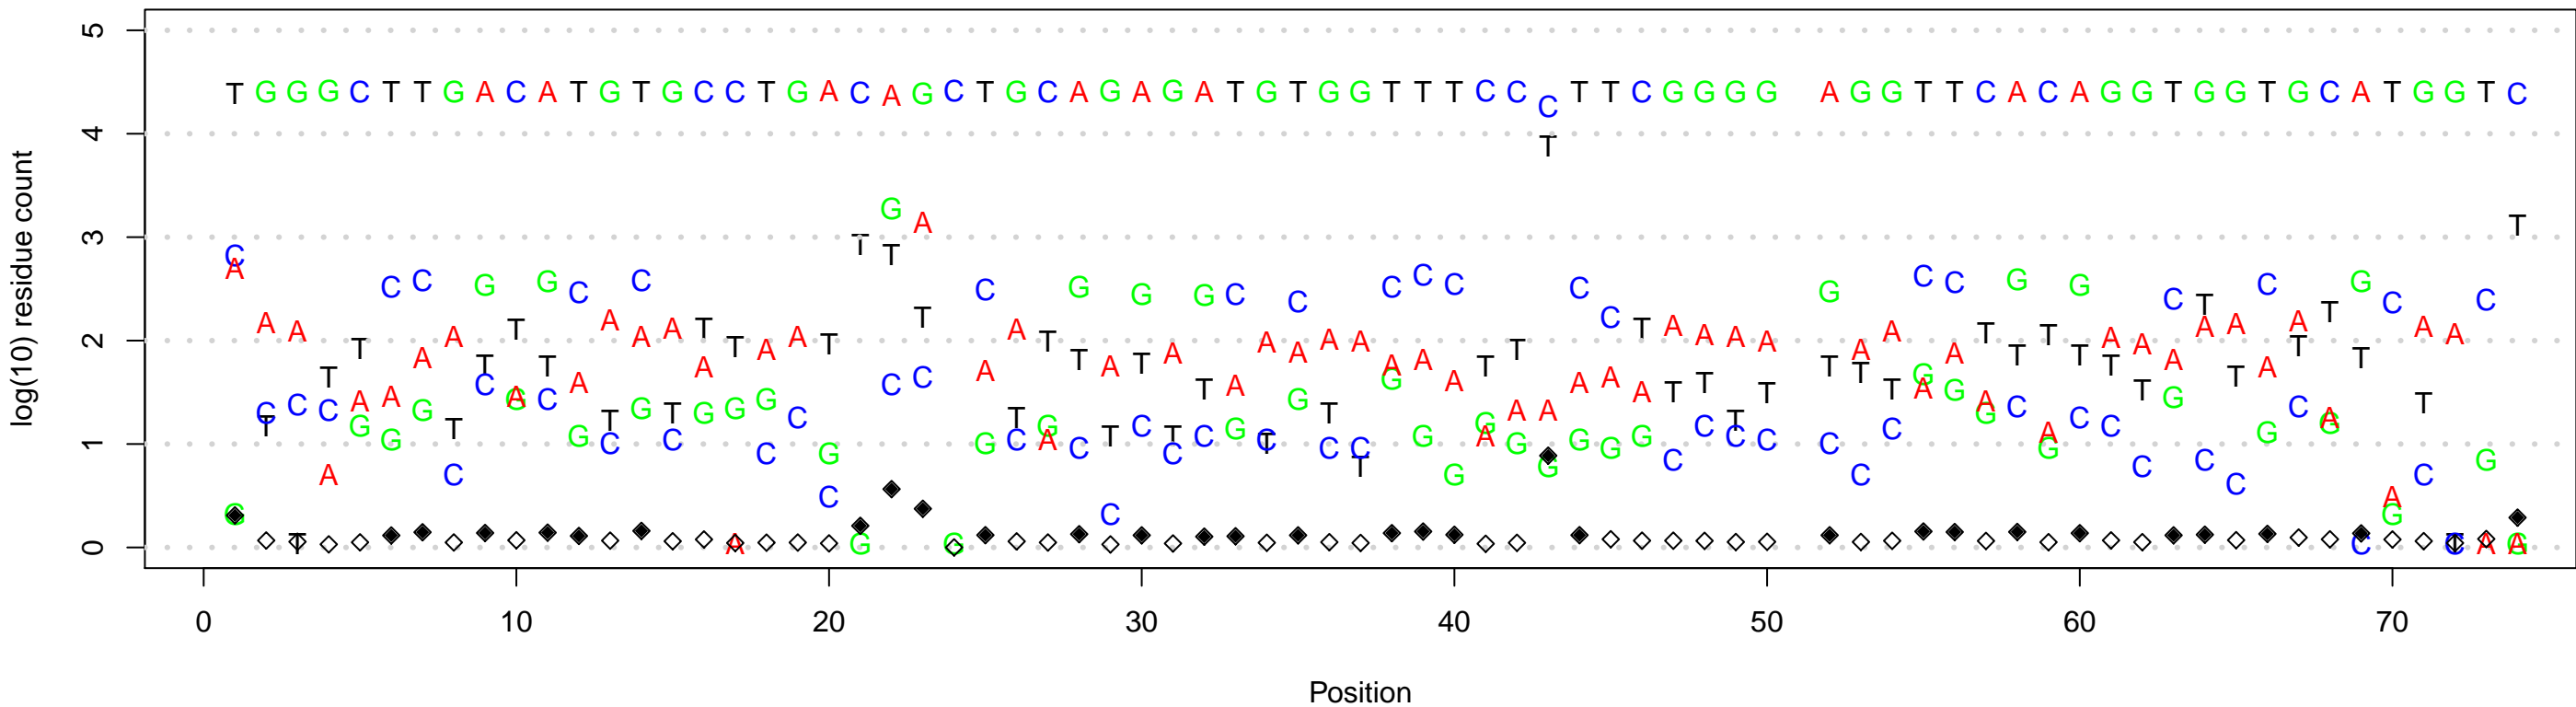

otu 47 4.4 6.6 29.1

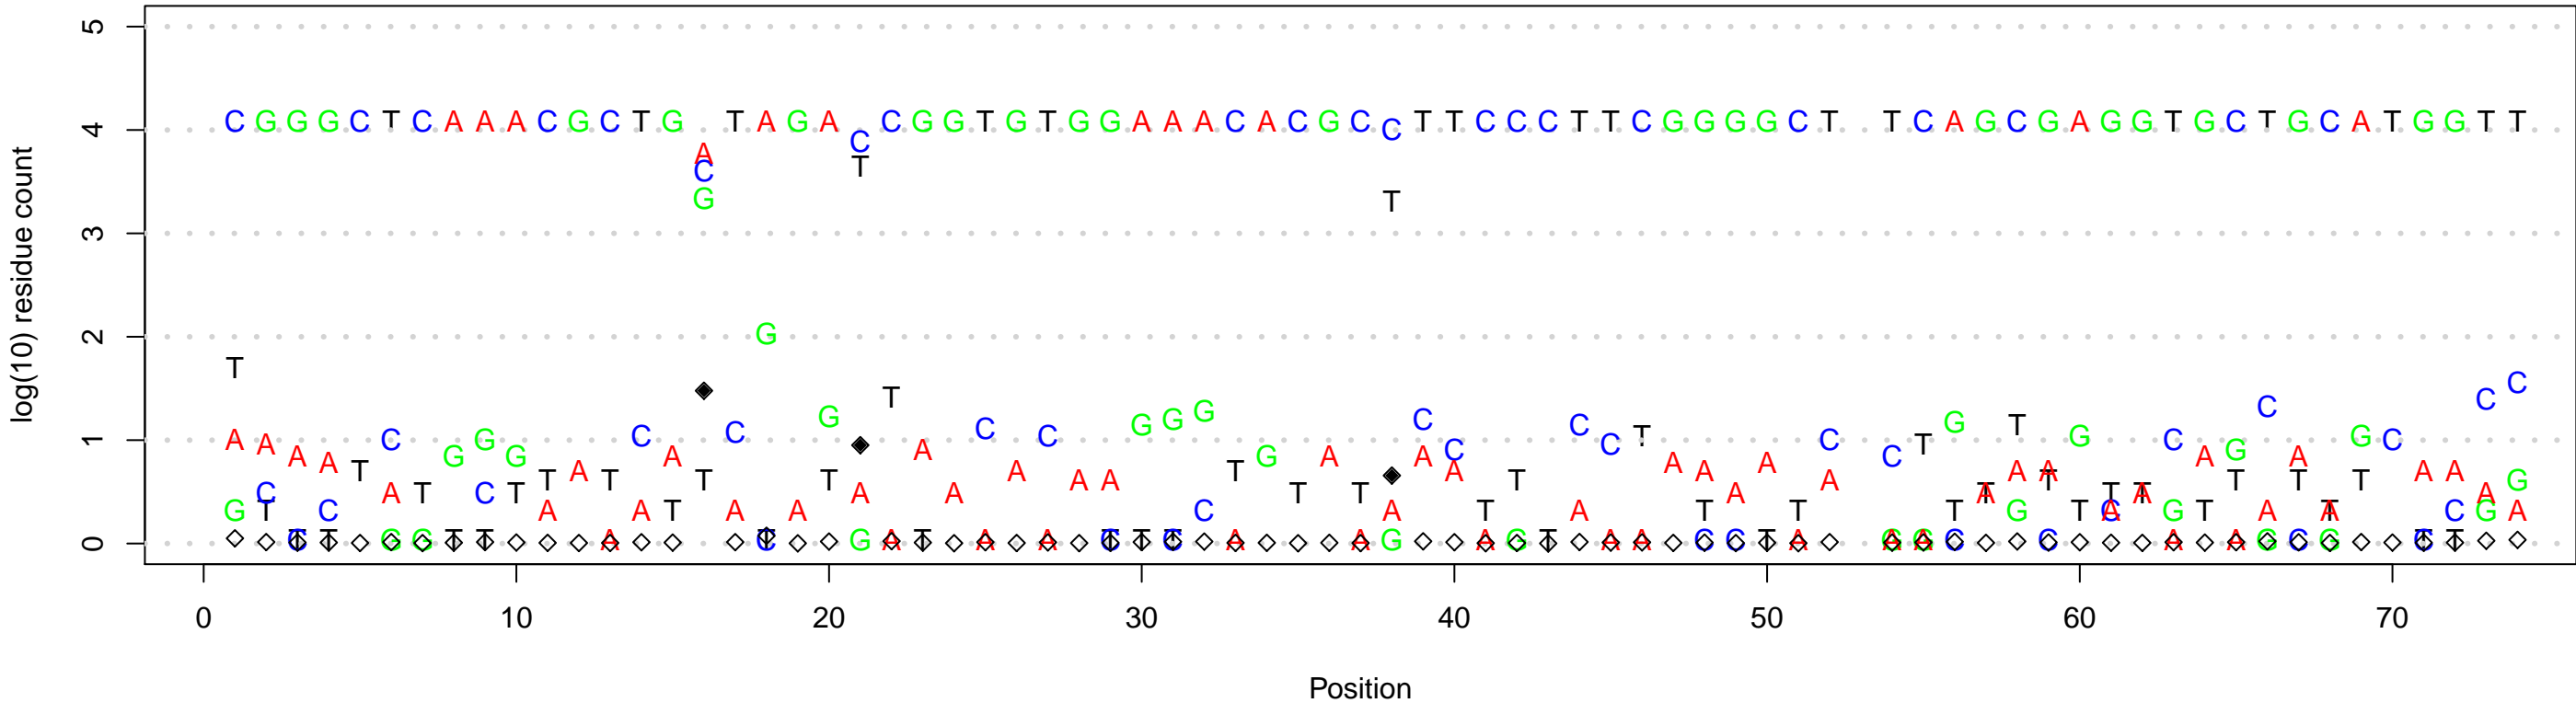

otu 48 2.8 6.6 18.9

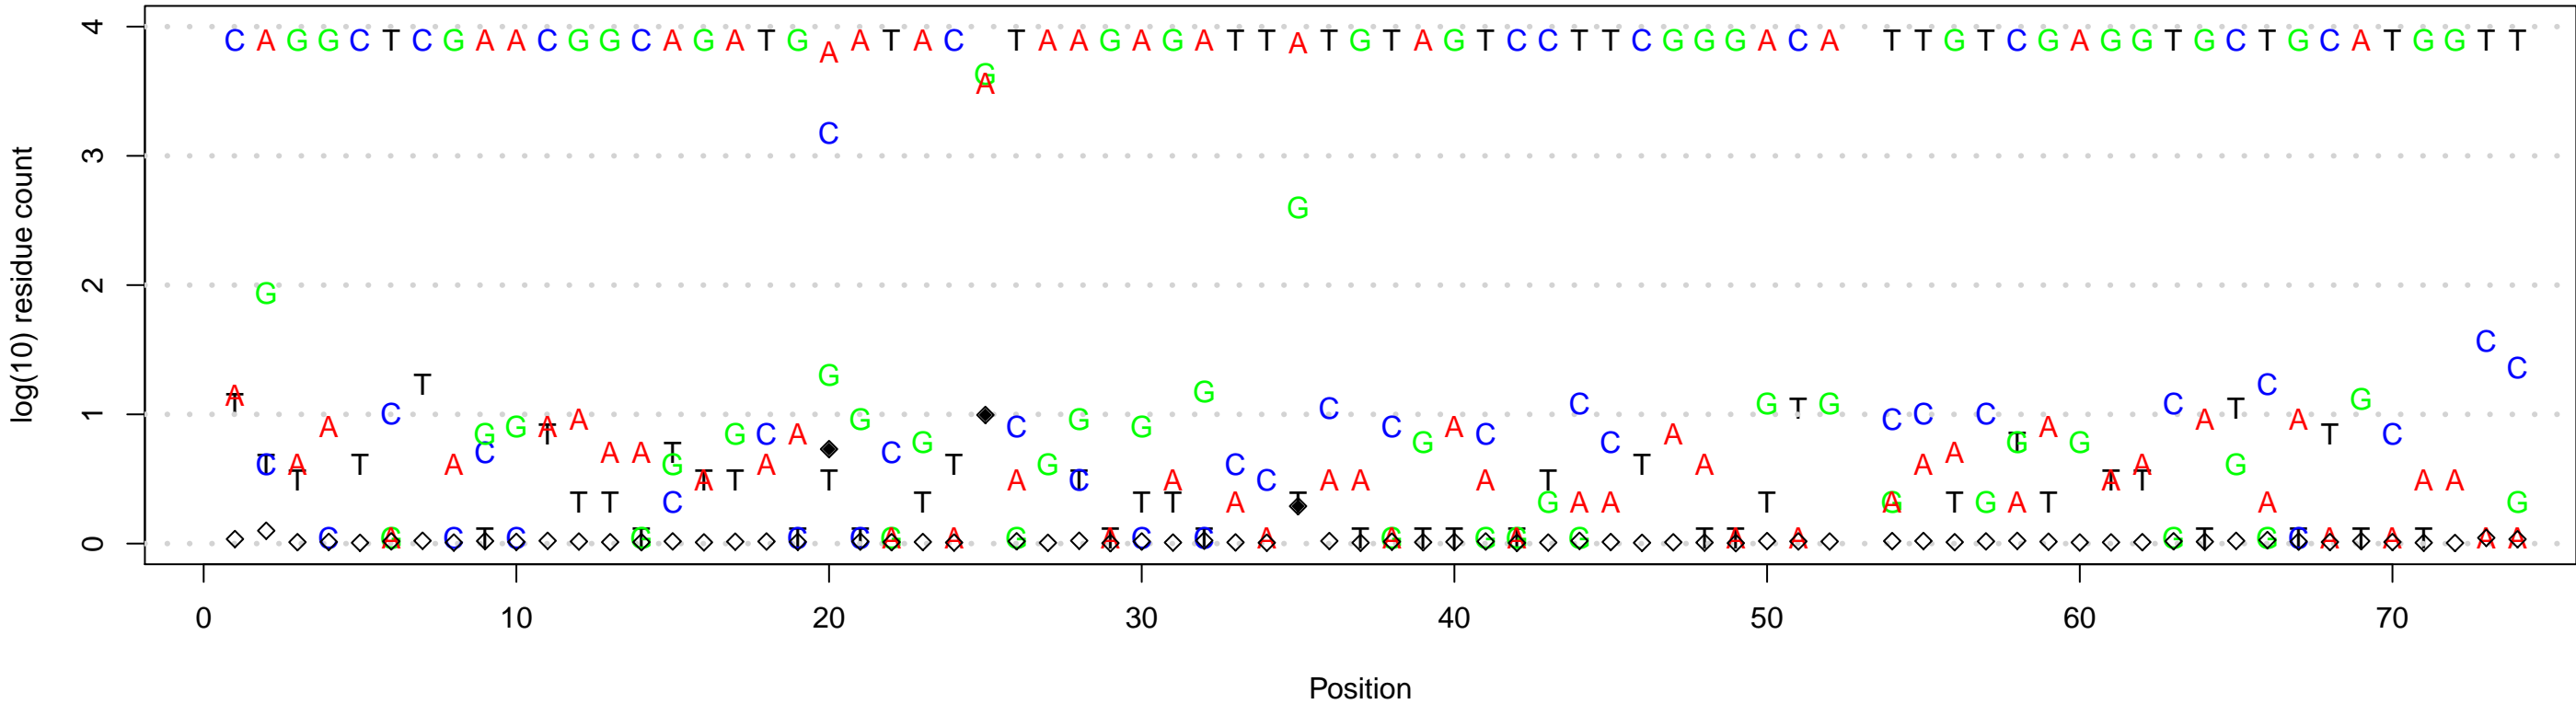

otu 50 0.6 4.6 2.9

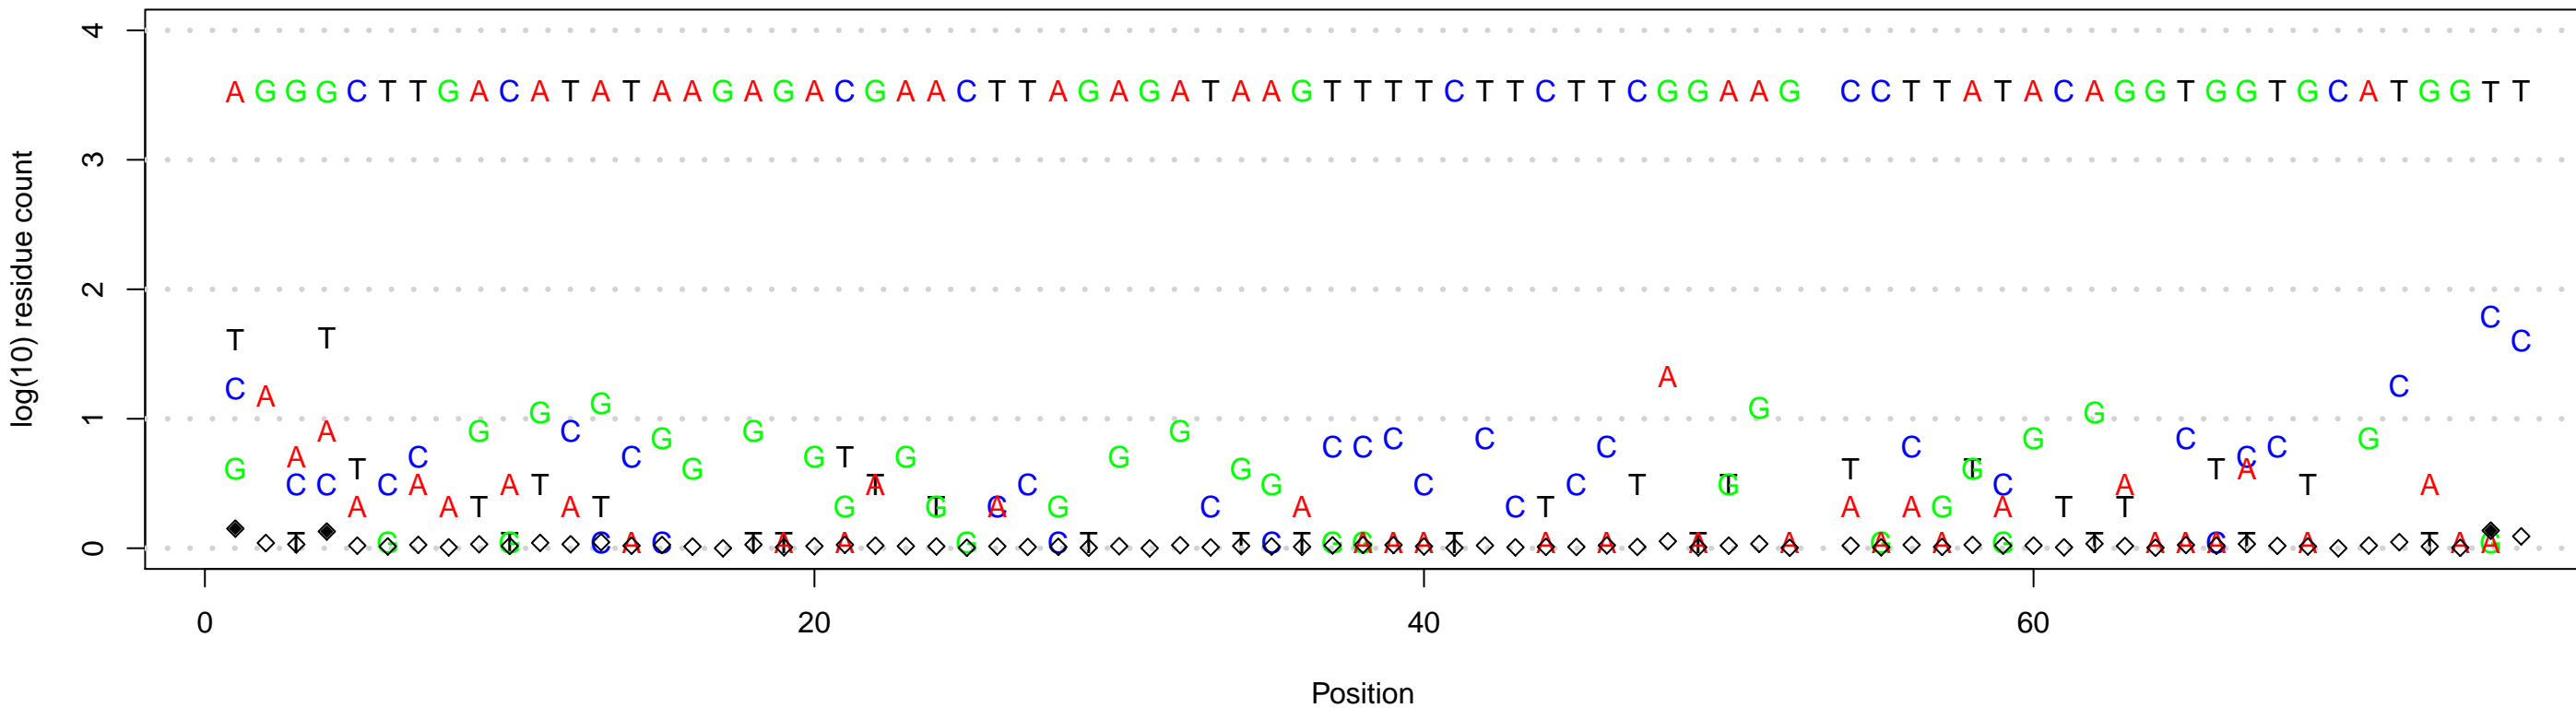



otu 52 1.7 8.1 13.3

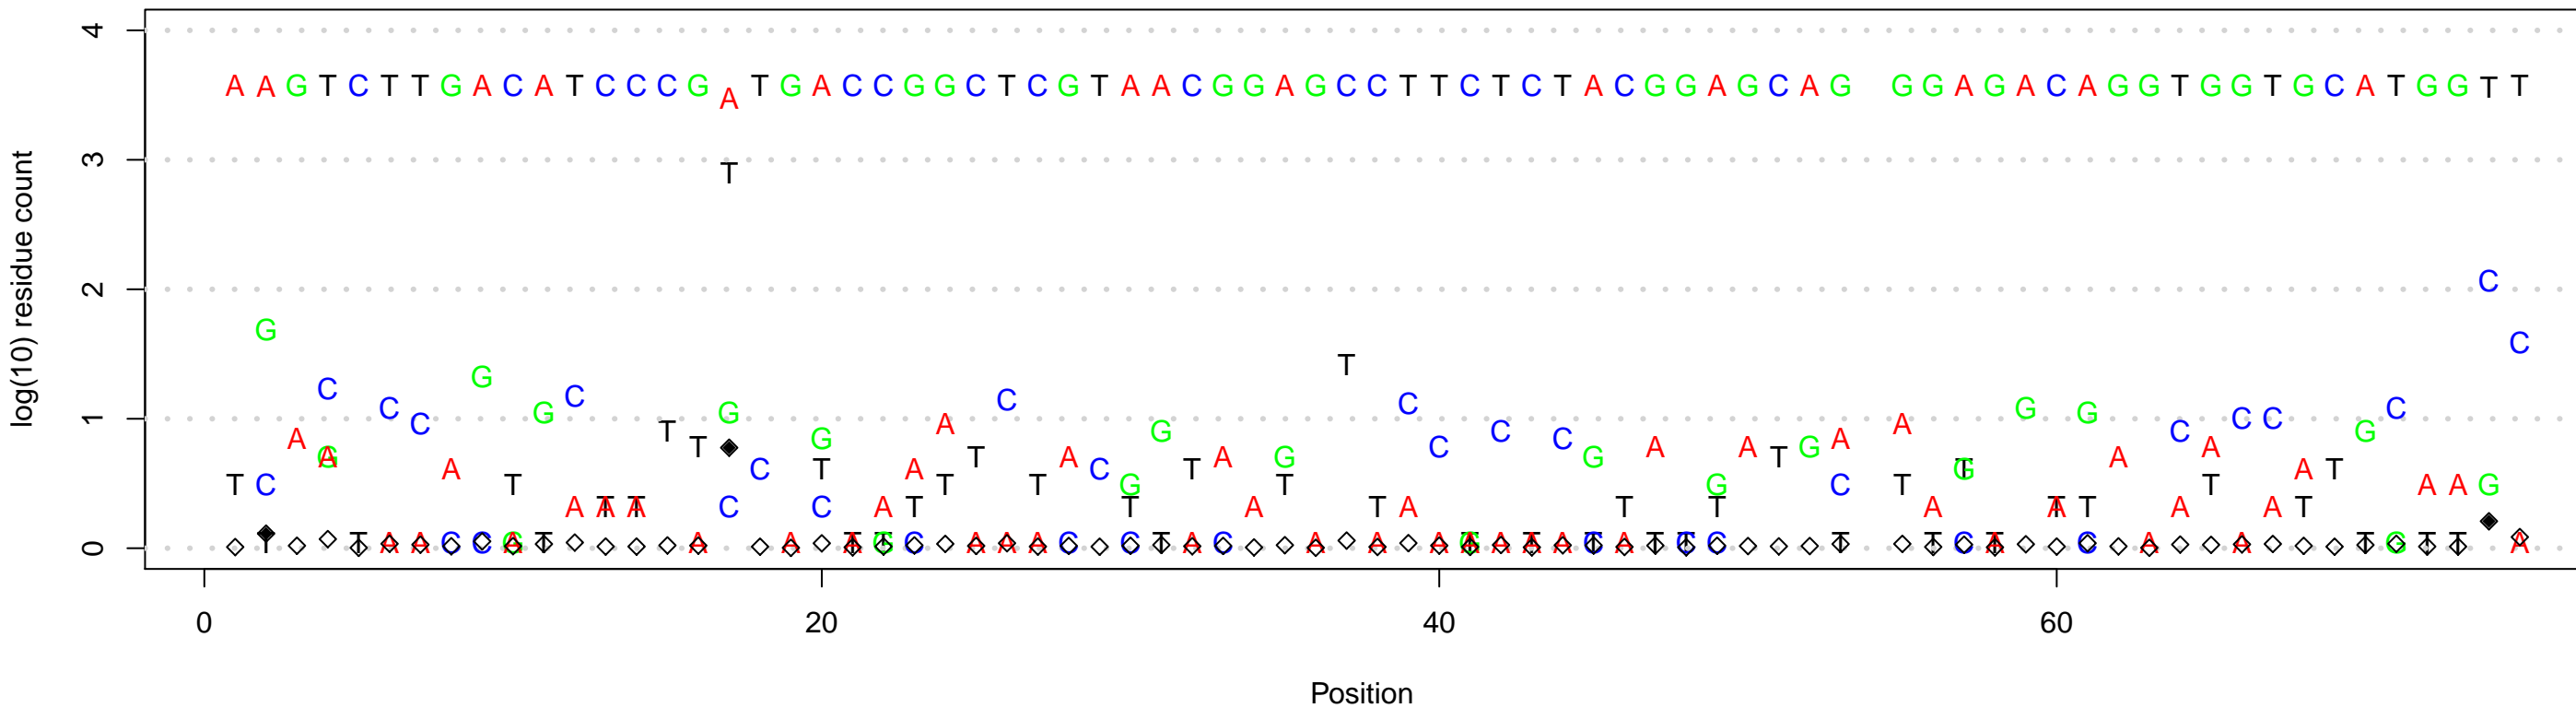

otu 56 3.0 4.3 1.9

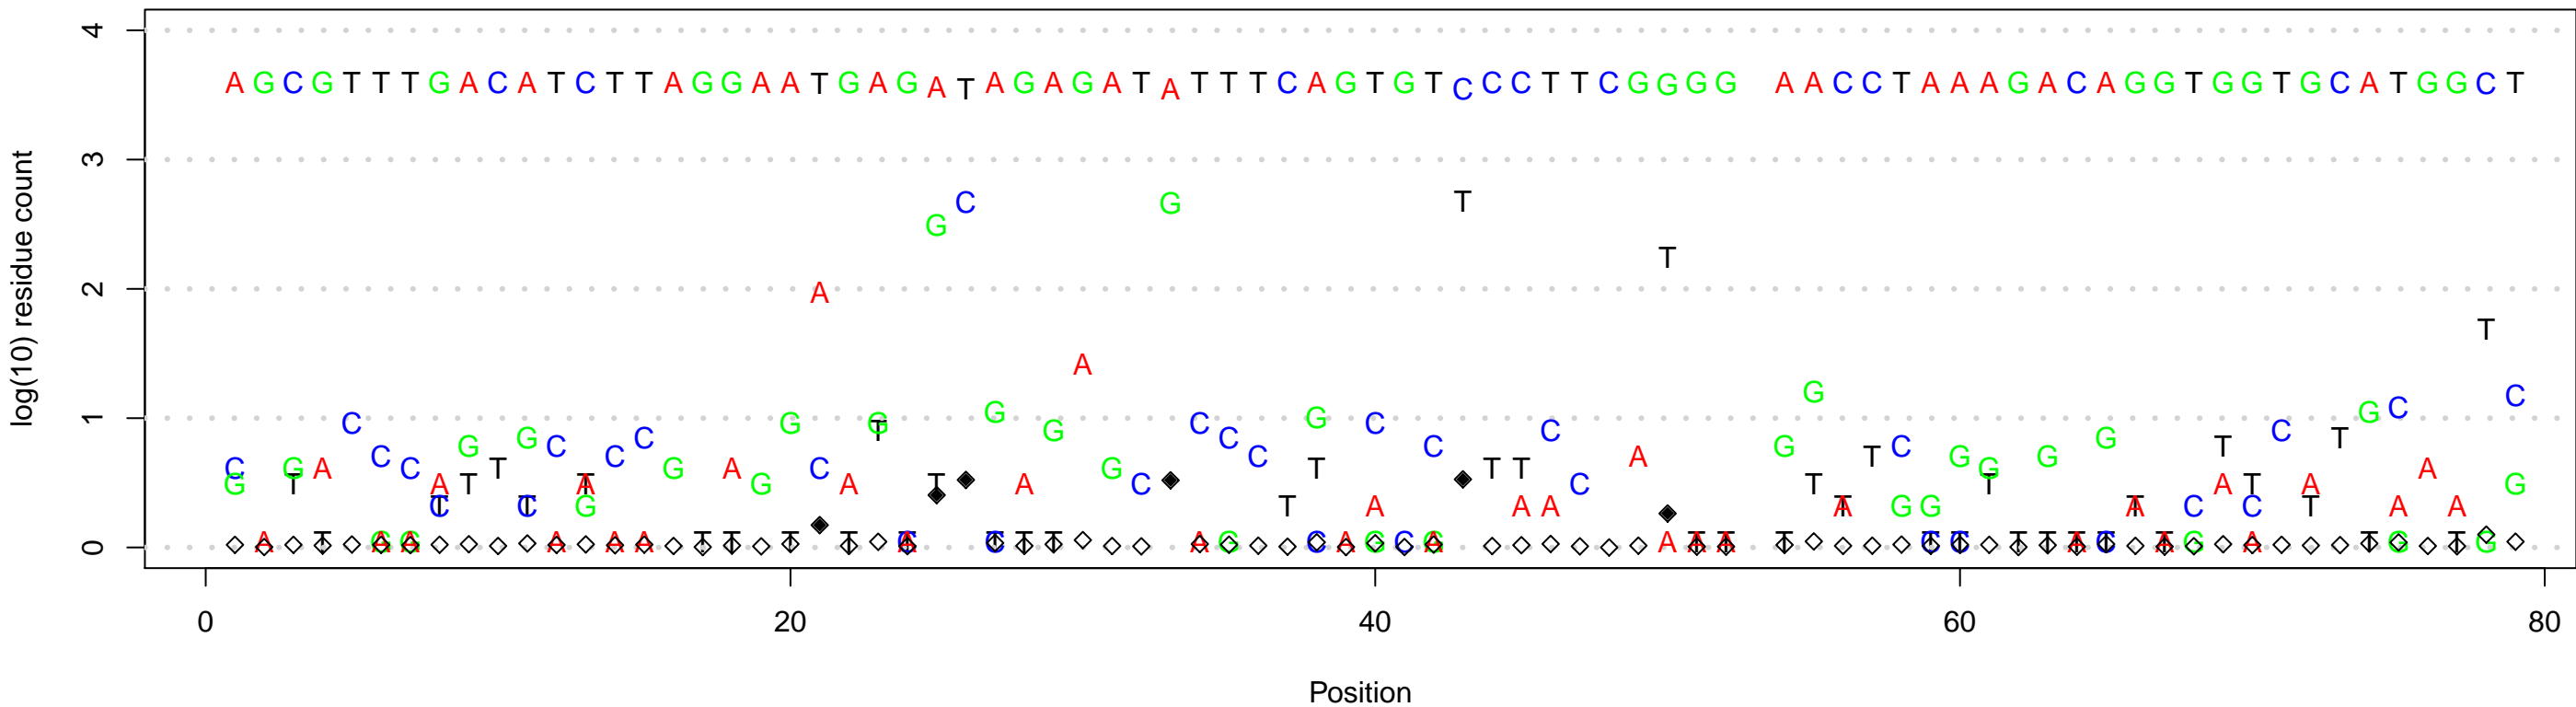



otu 59 0.4 5.7 3.9

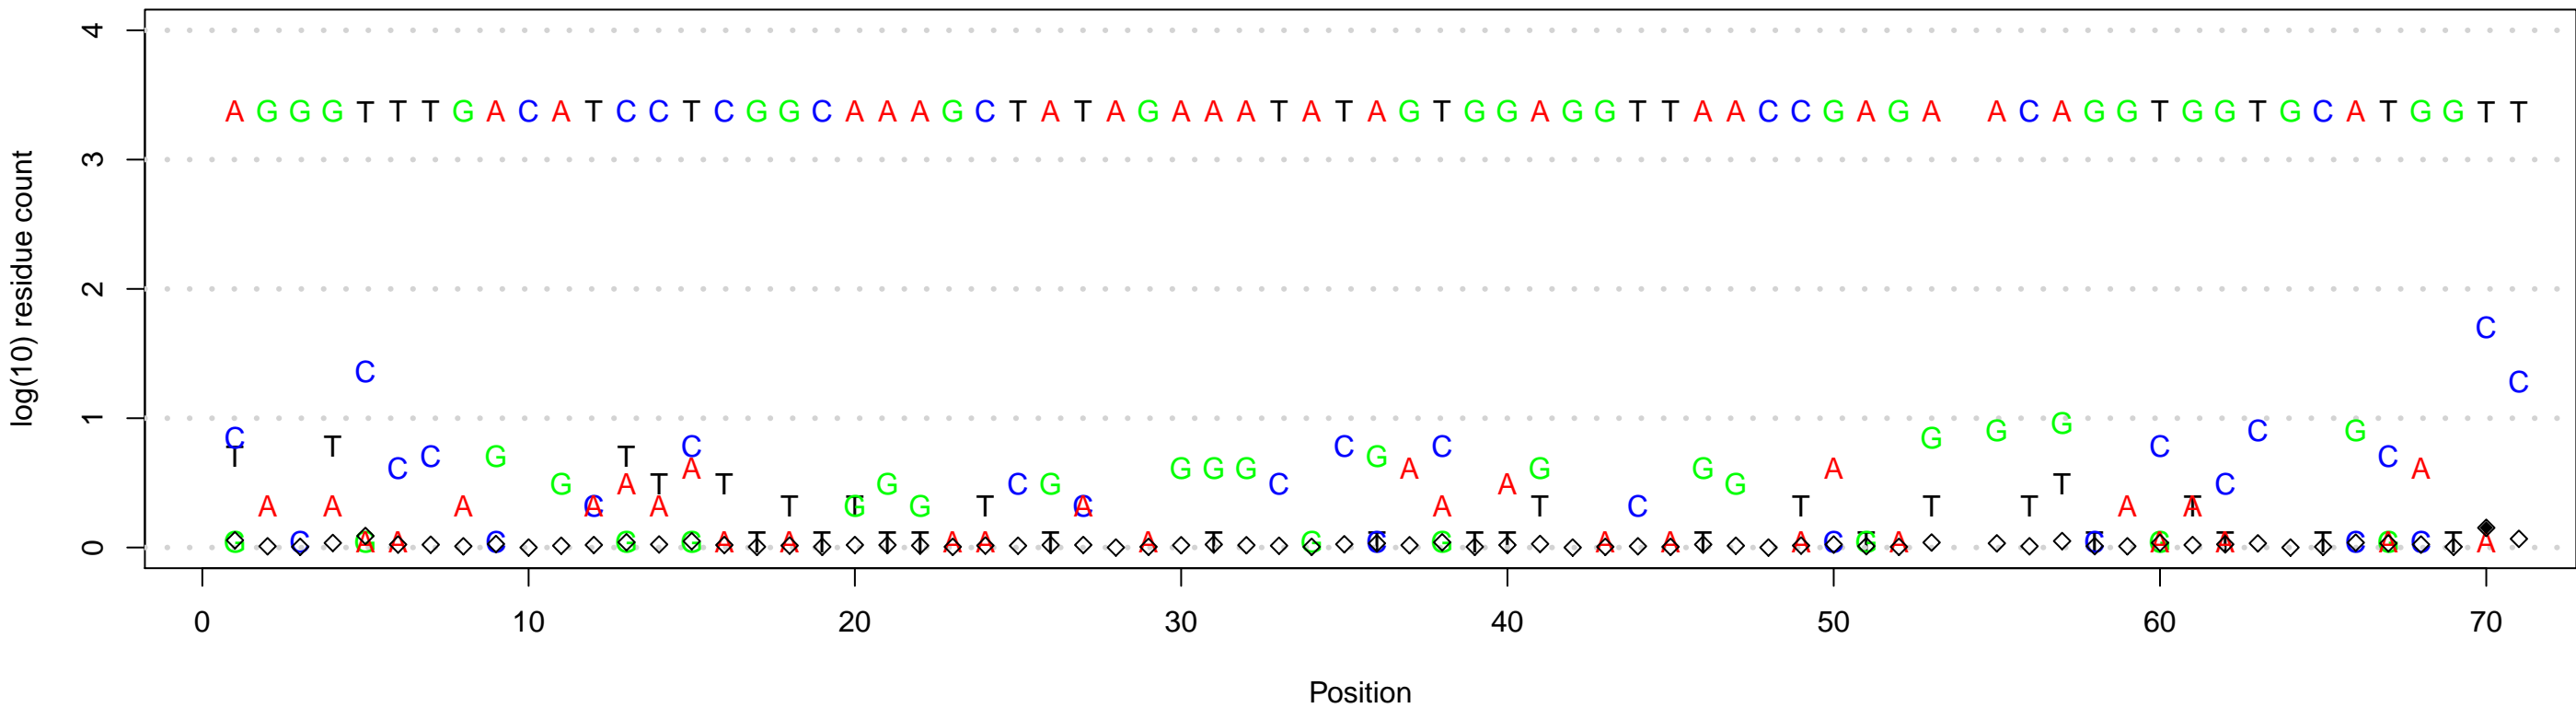

otu 60 2.3 7.9 13.2

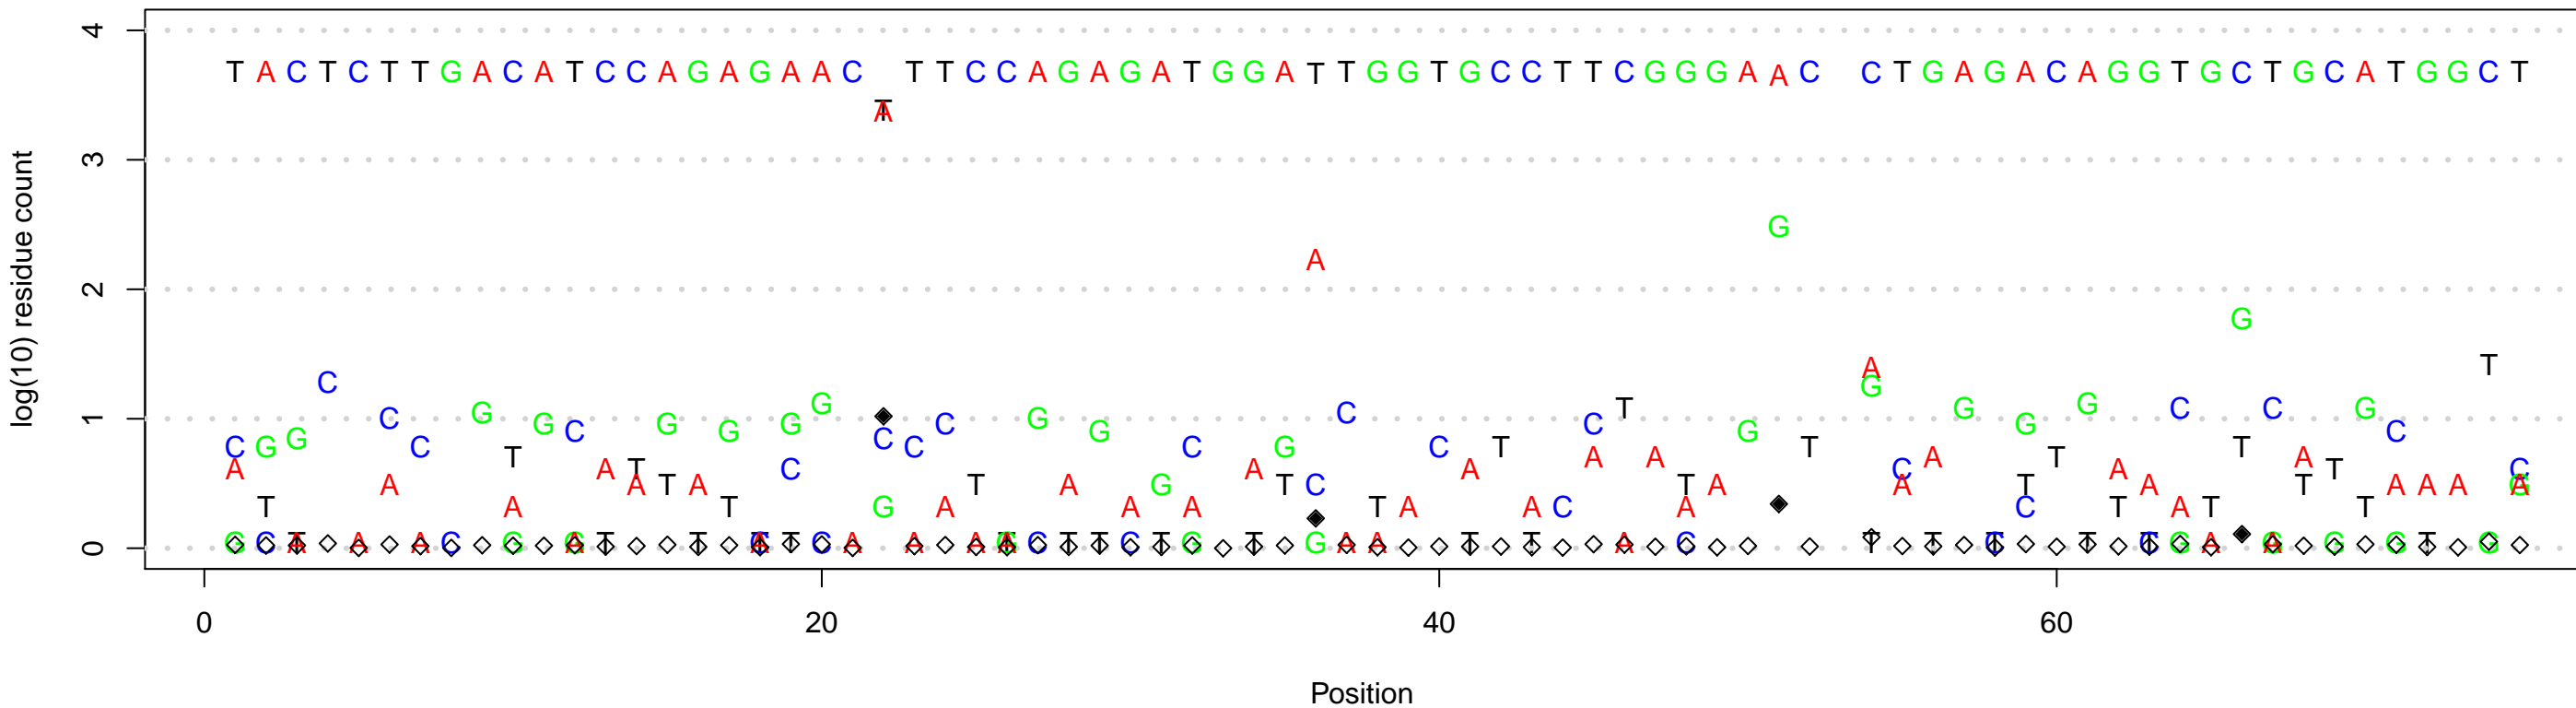

otu 61 0.6 6.3 5.2

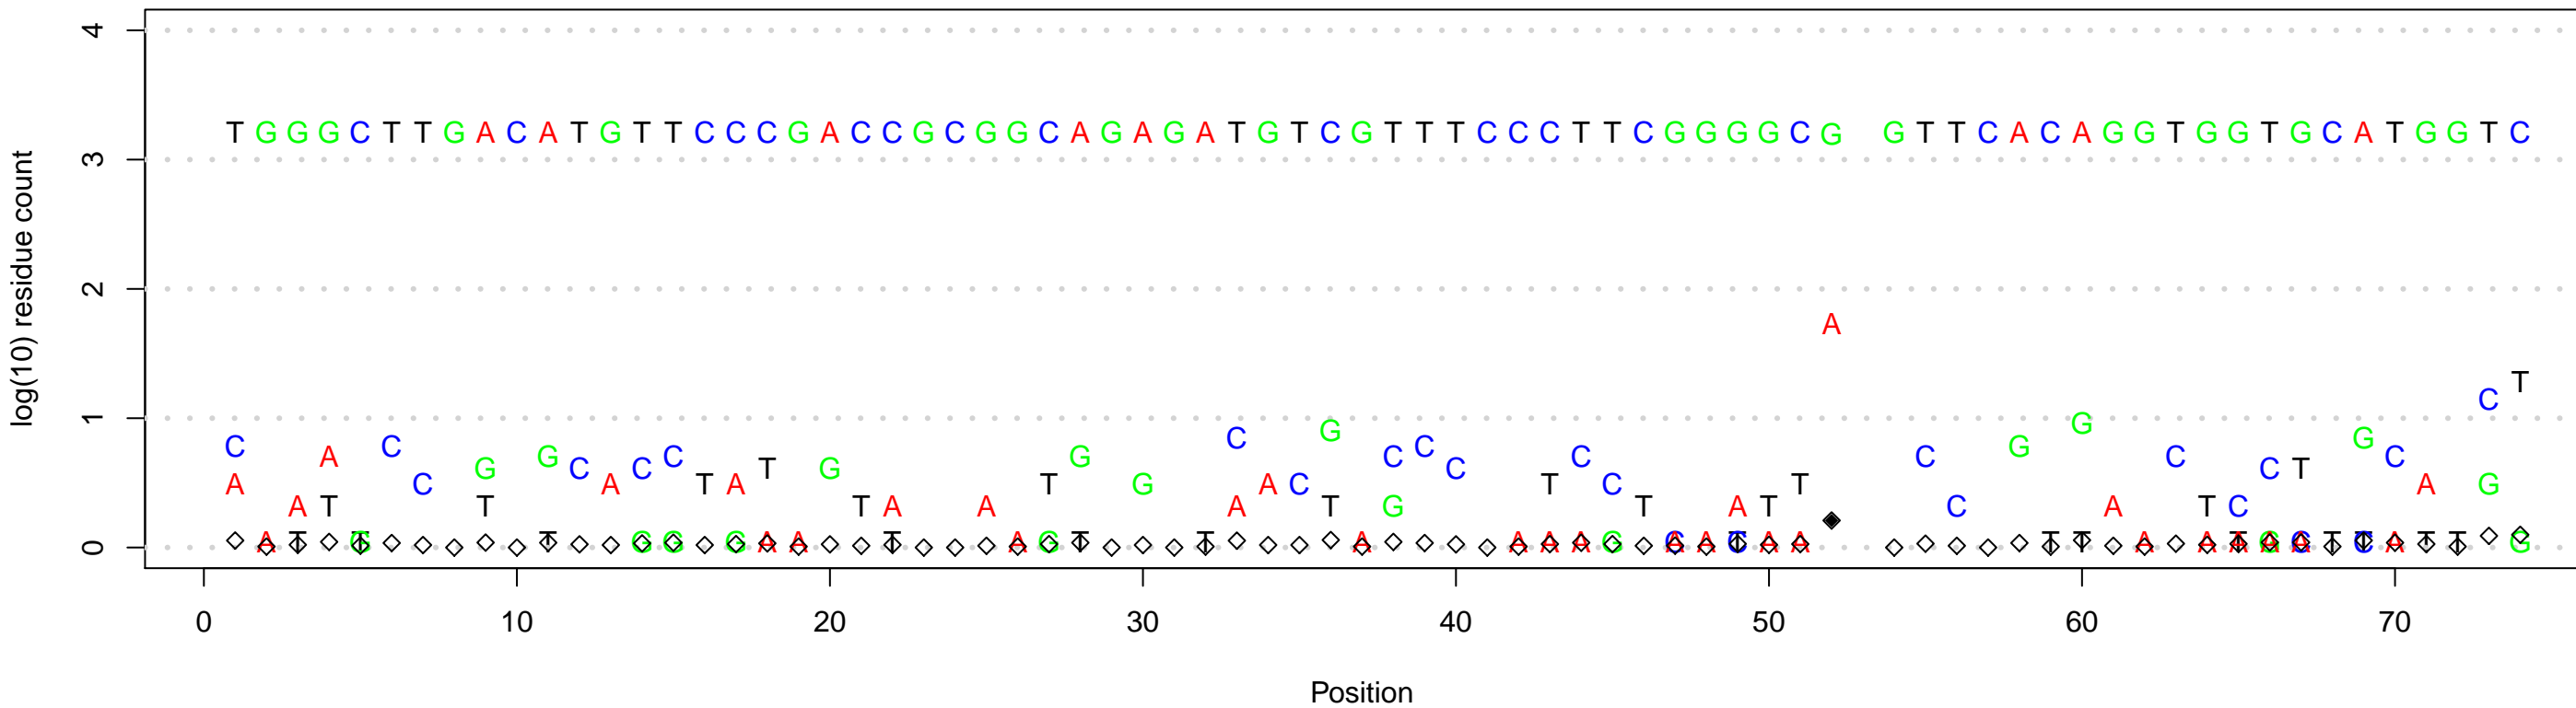

otu 63 2.5 6.1 11.5

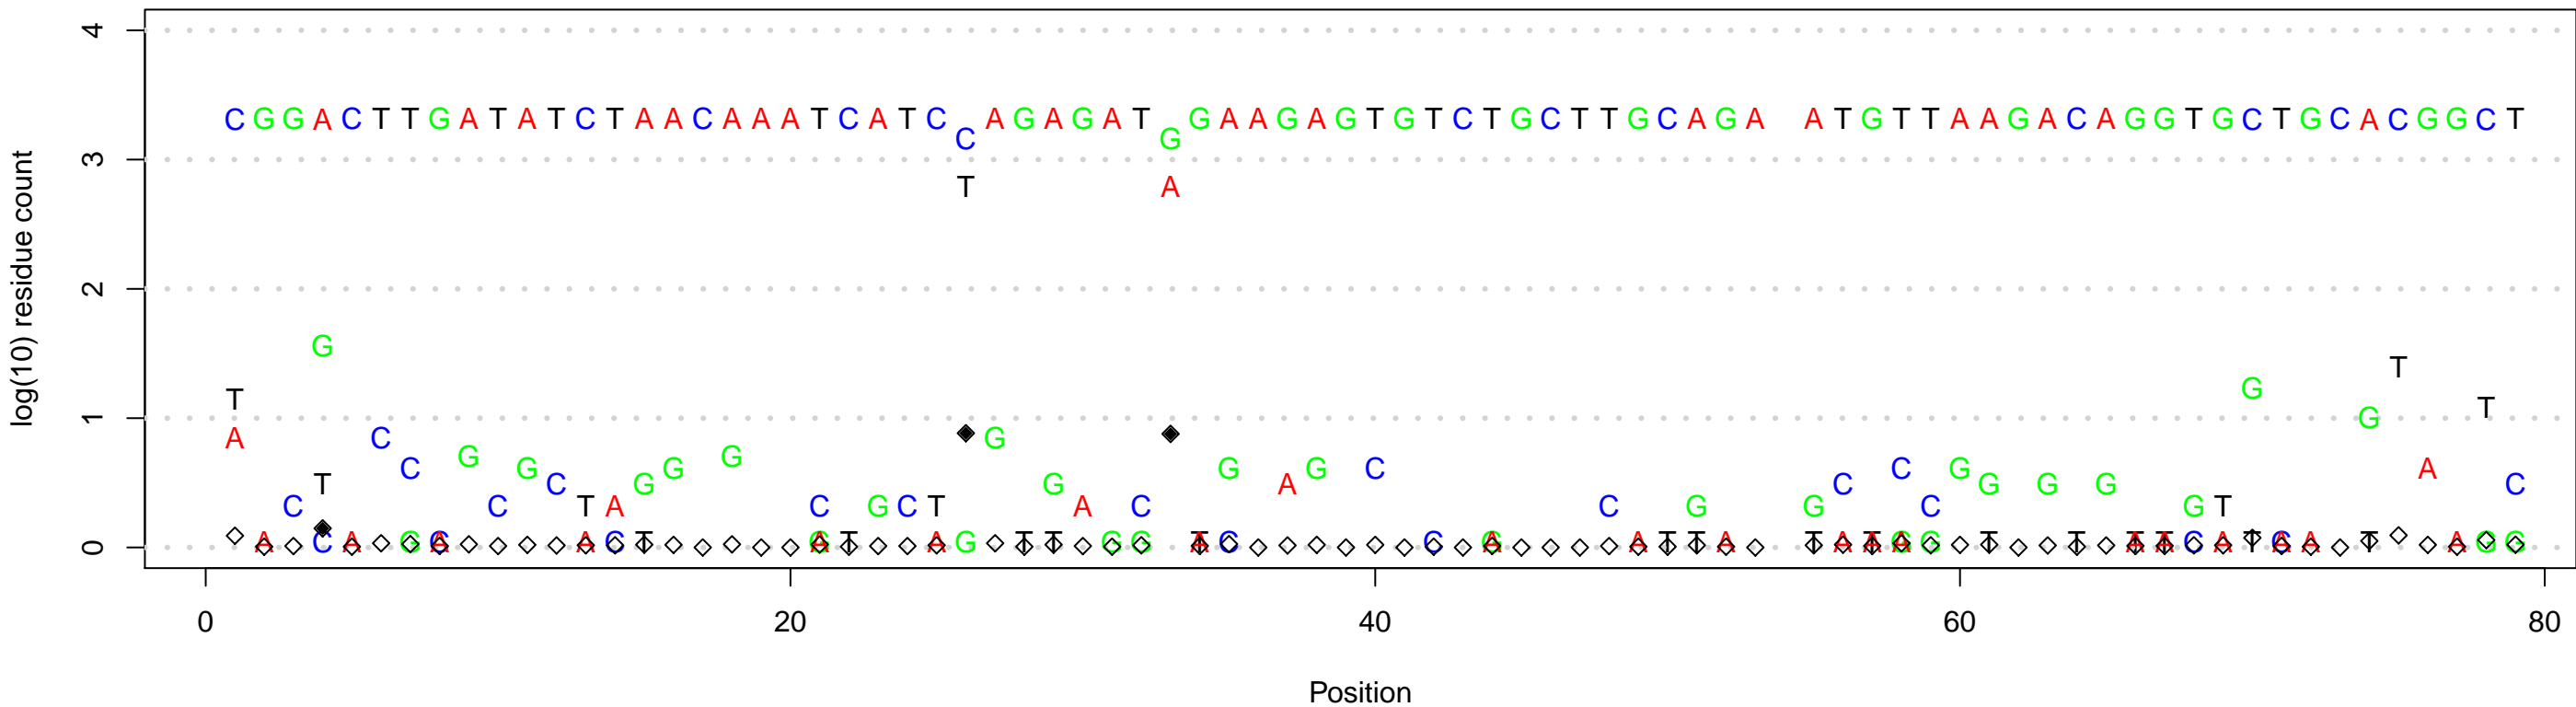

otu 64 1.0 4.7 1.9

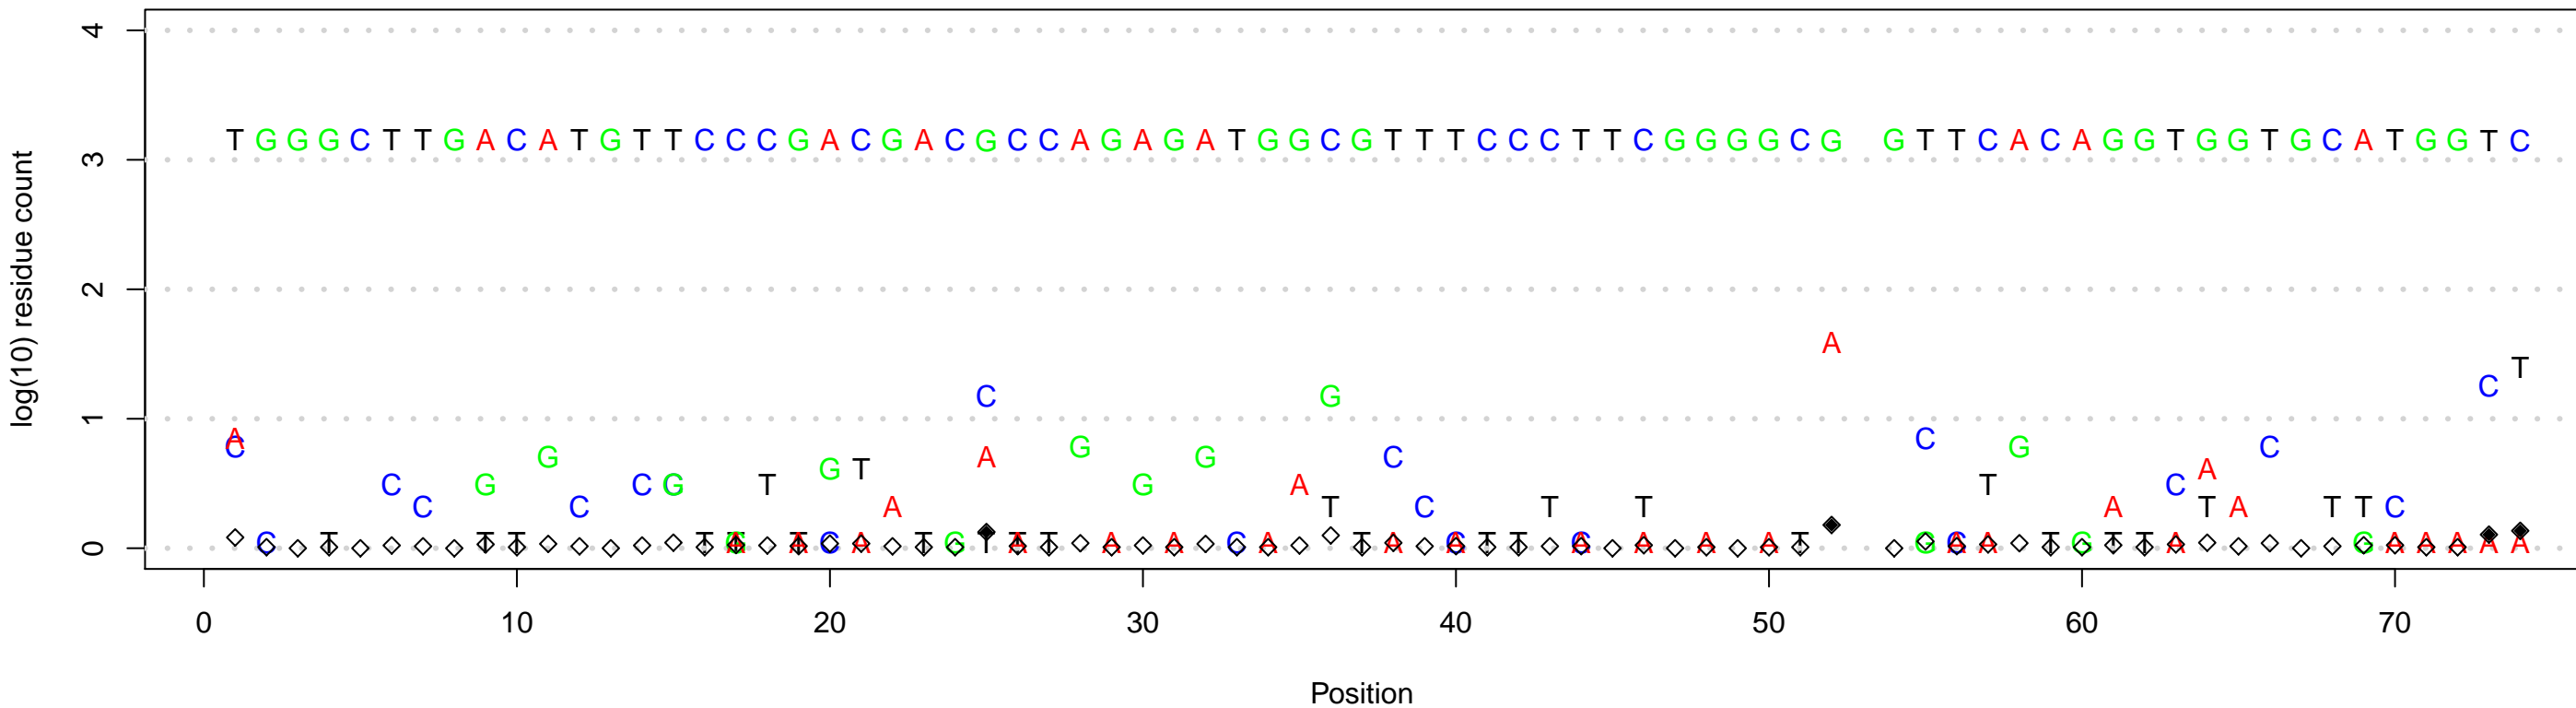



otu 65 0.7 5.8 3.4

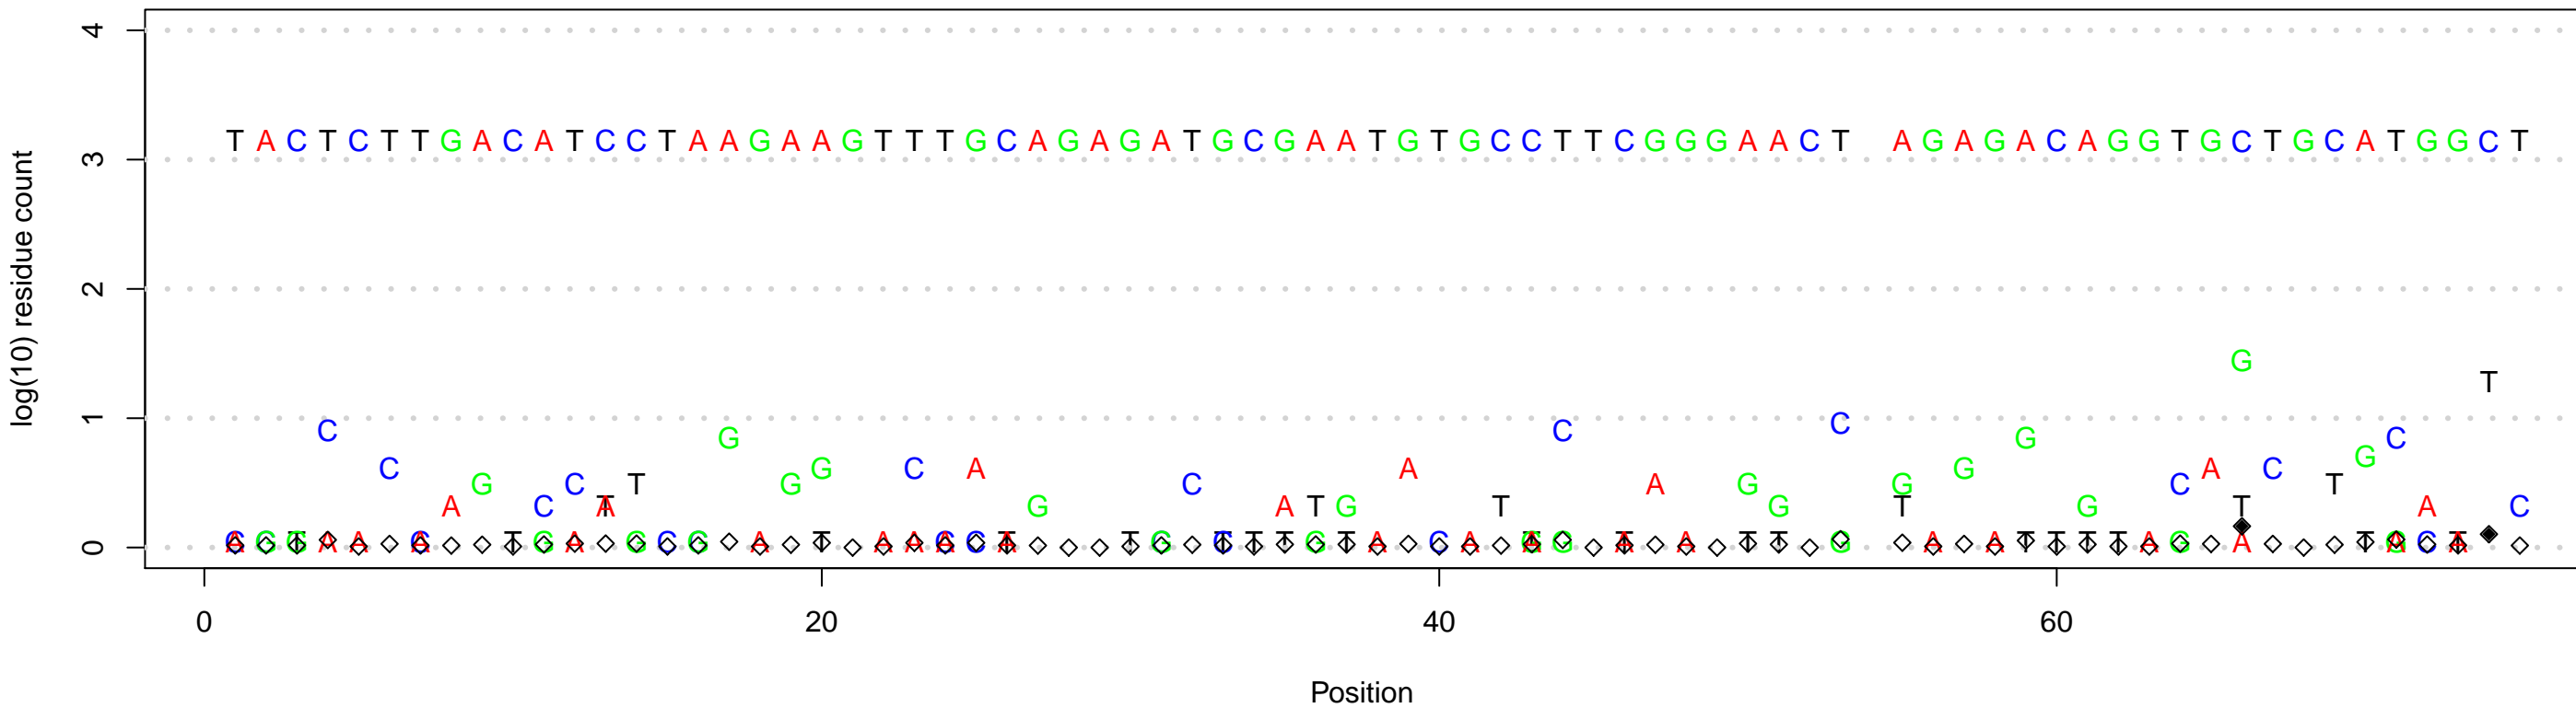

otu 68 0.1 3.4 1.8

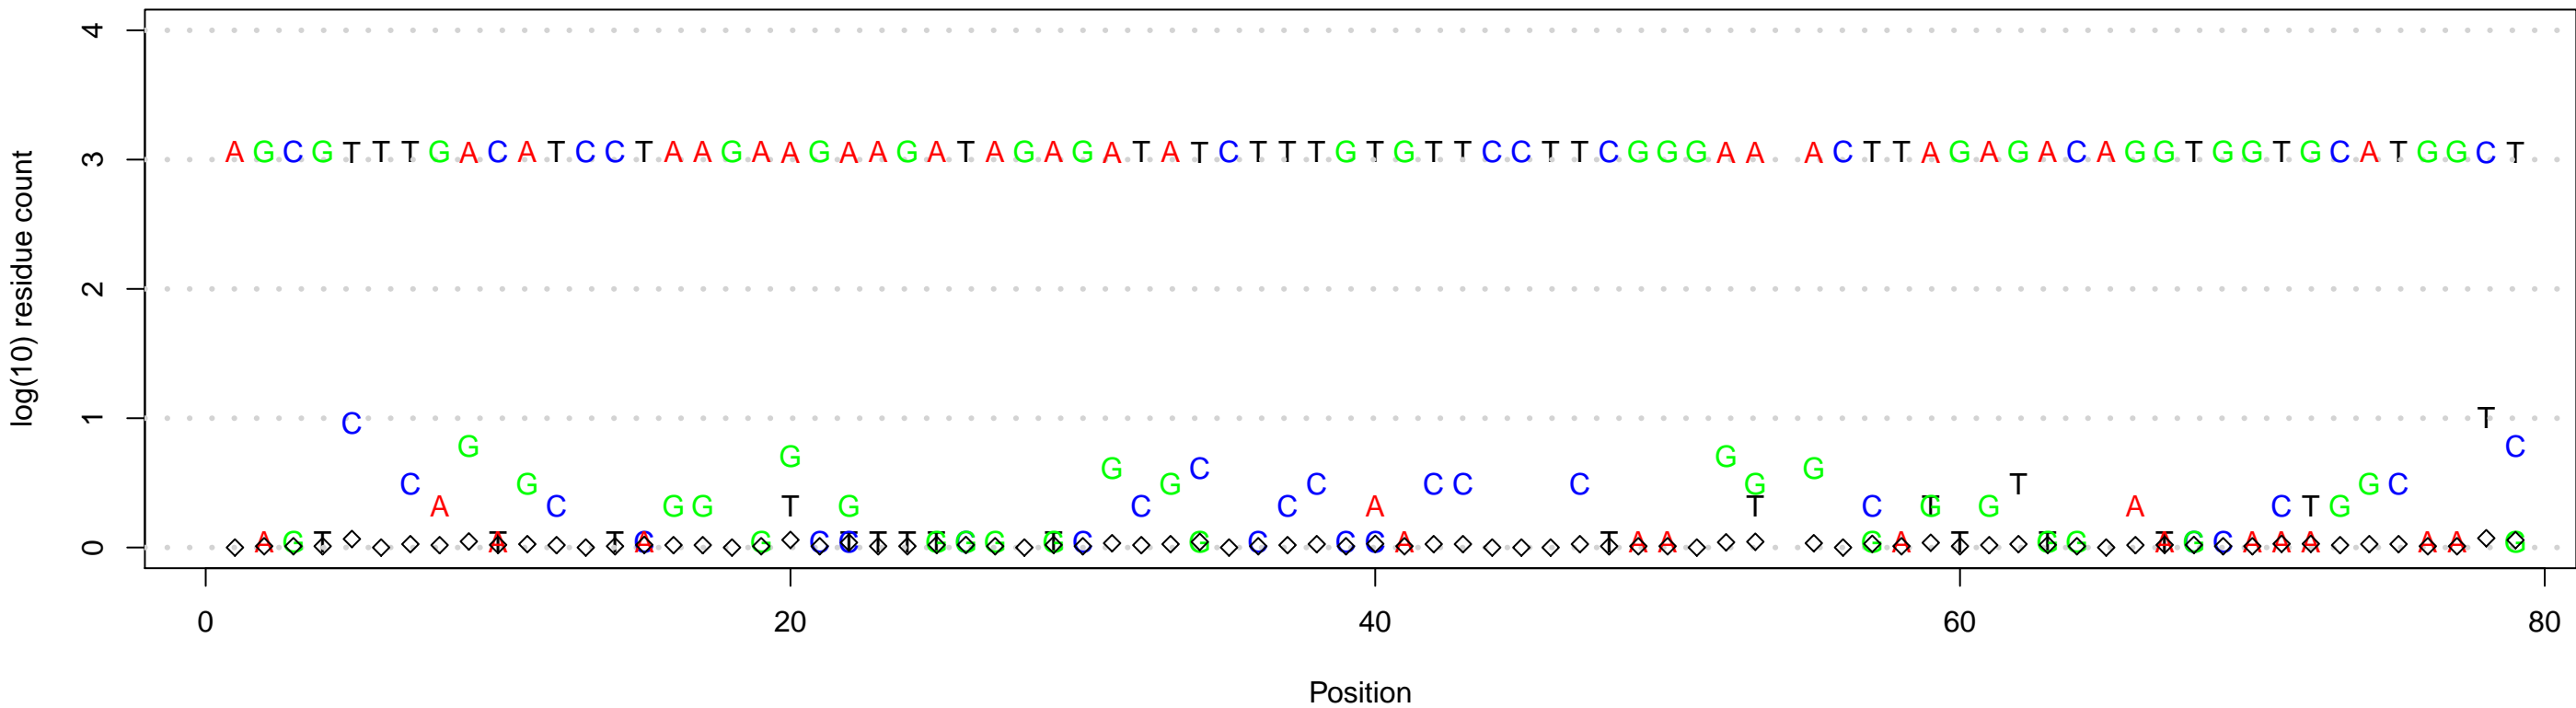

otu 70 0.2 3.0 1.5

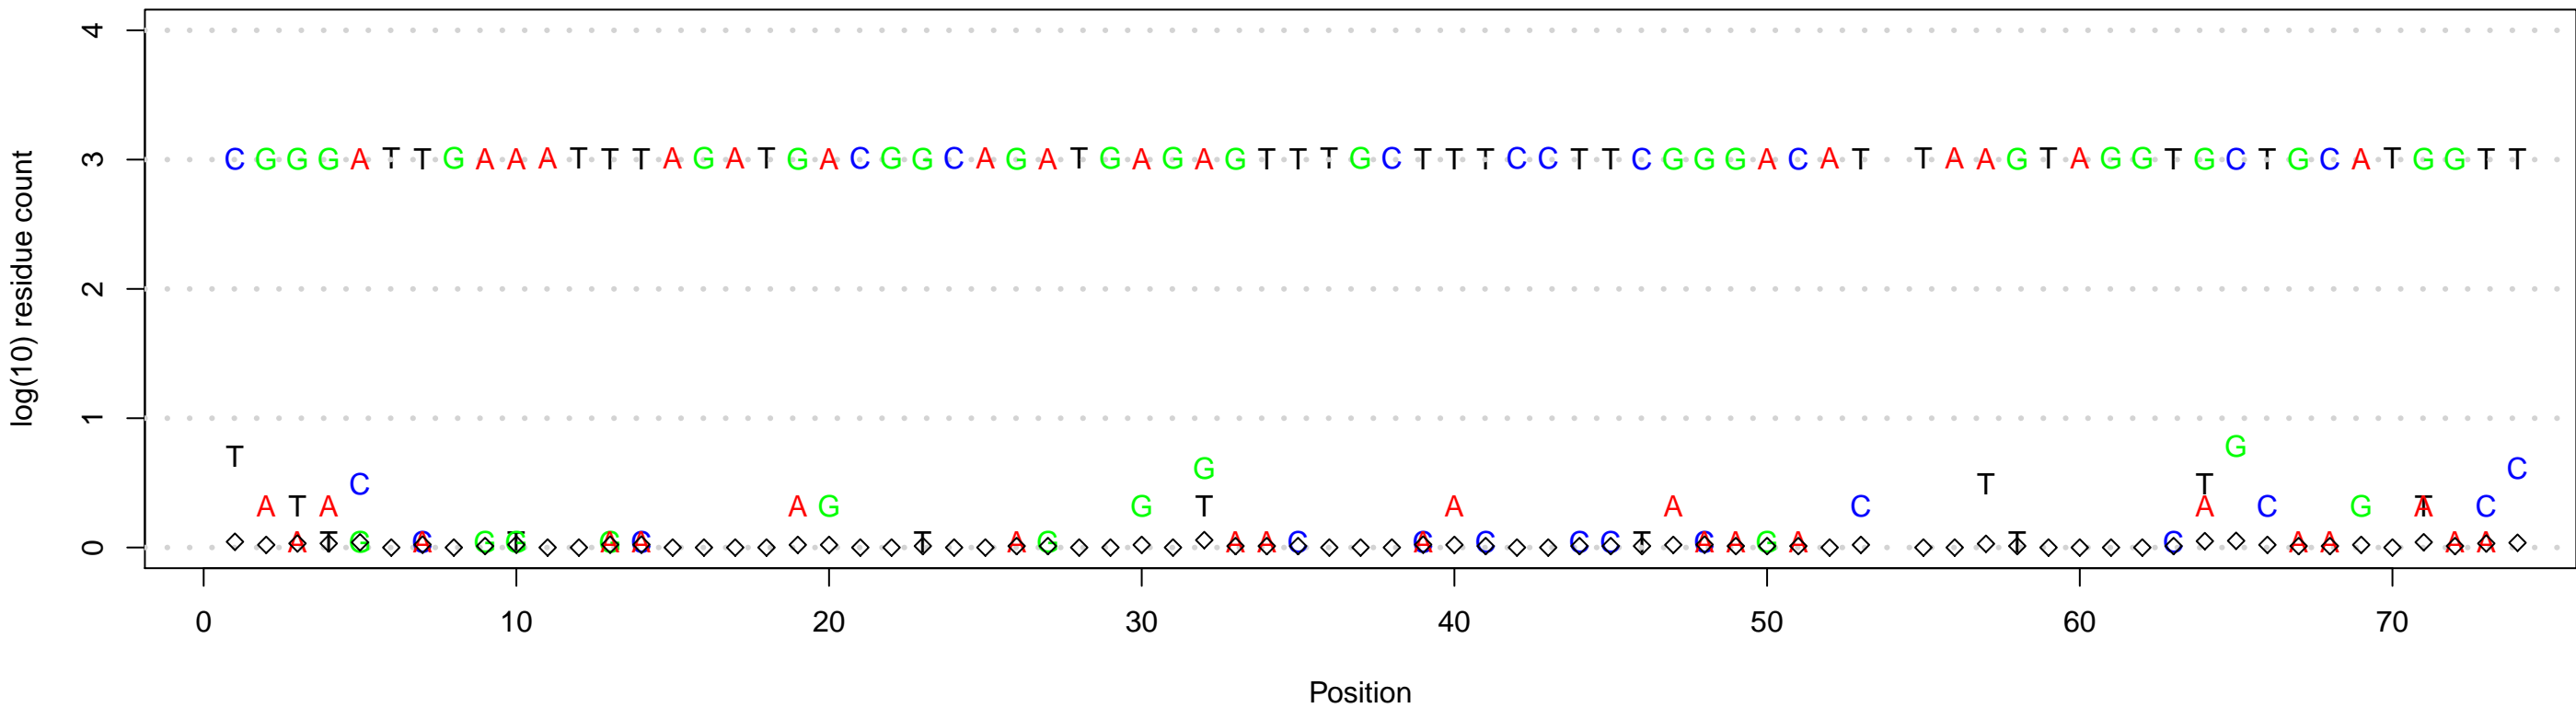

otu 76 2.1 6.2 4.0

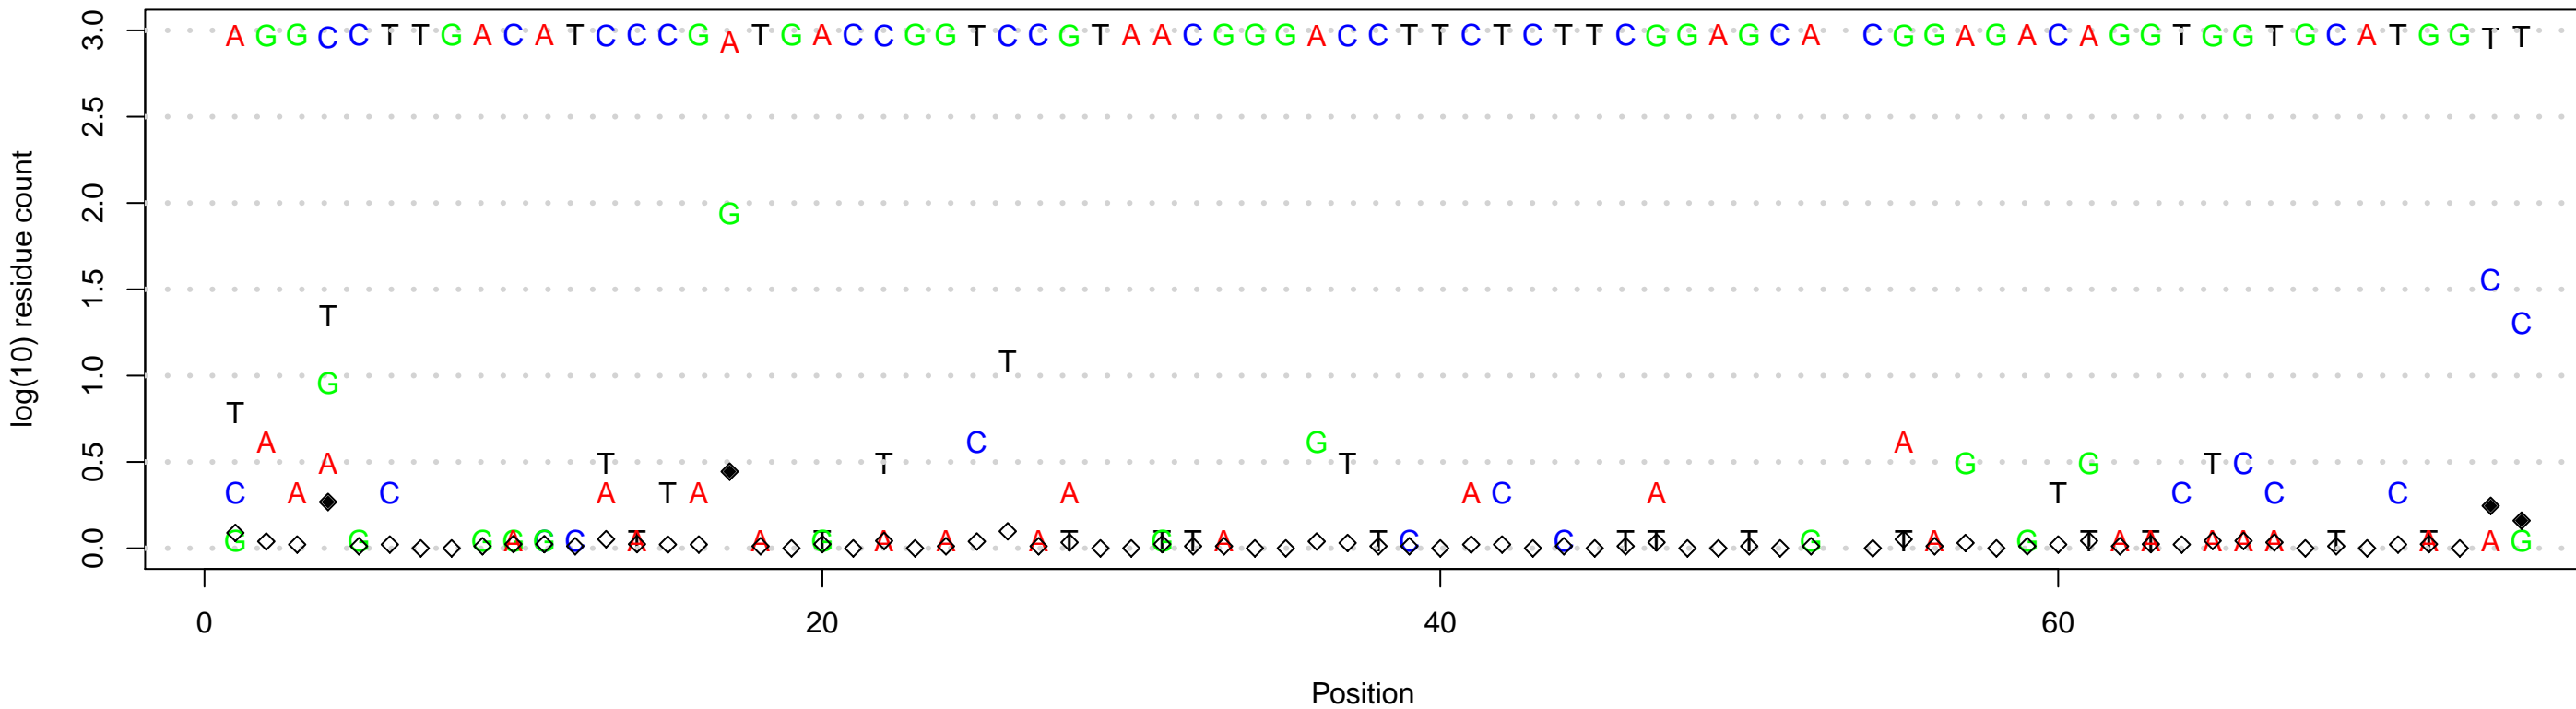

otu 97 5.3 6.7 4.9

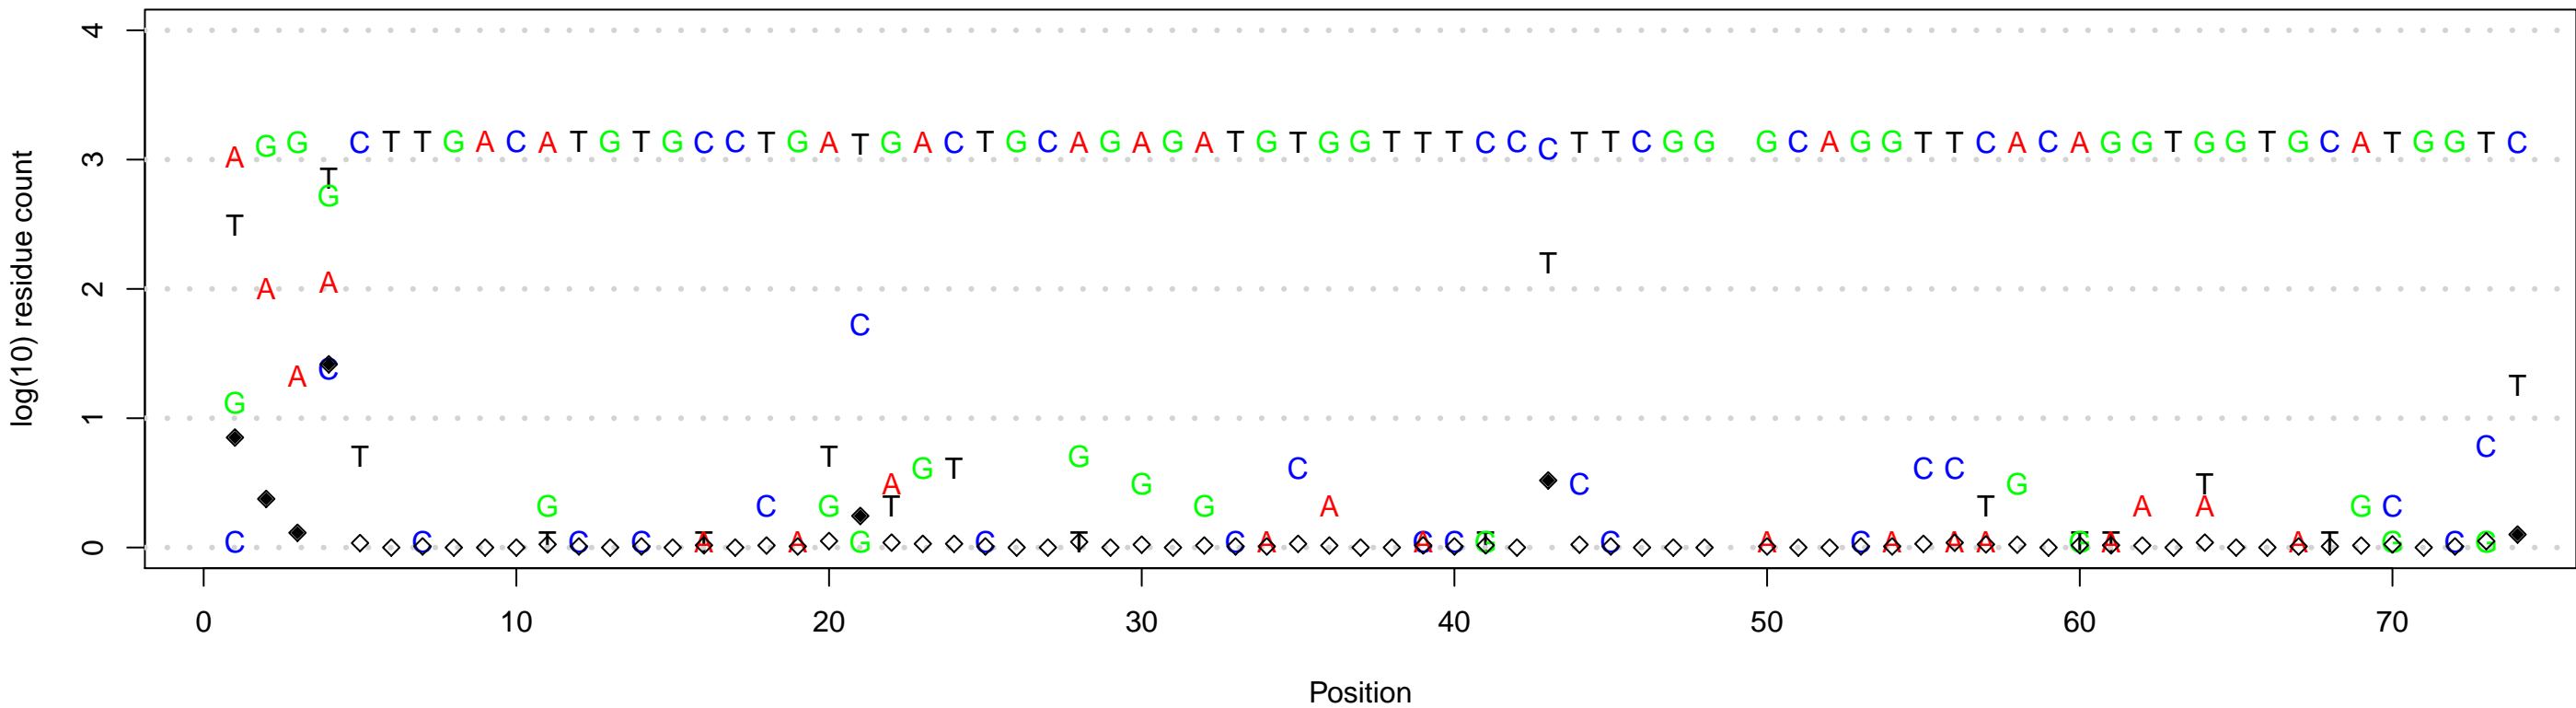



otu 119 1.2 2.2 1.4

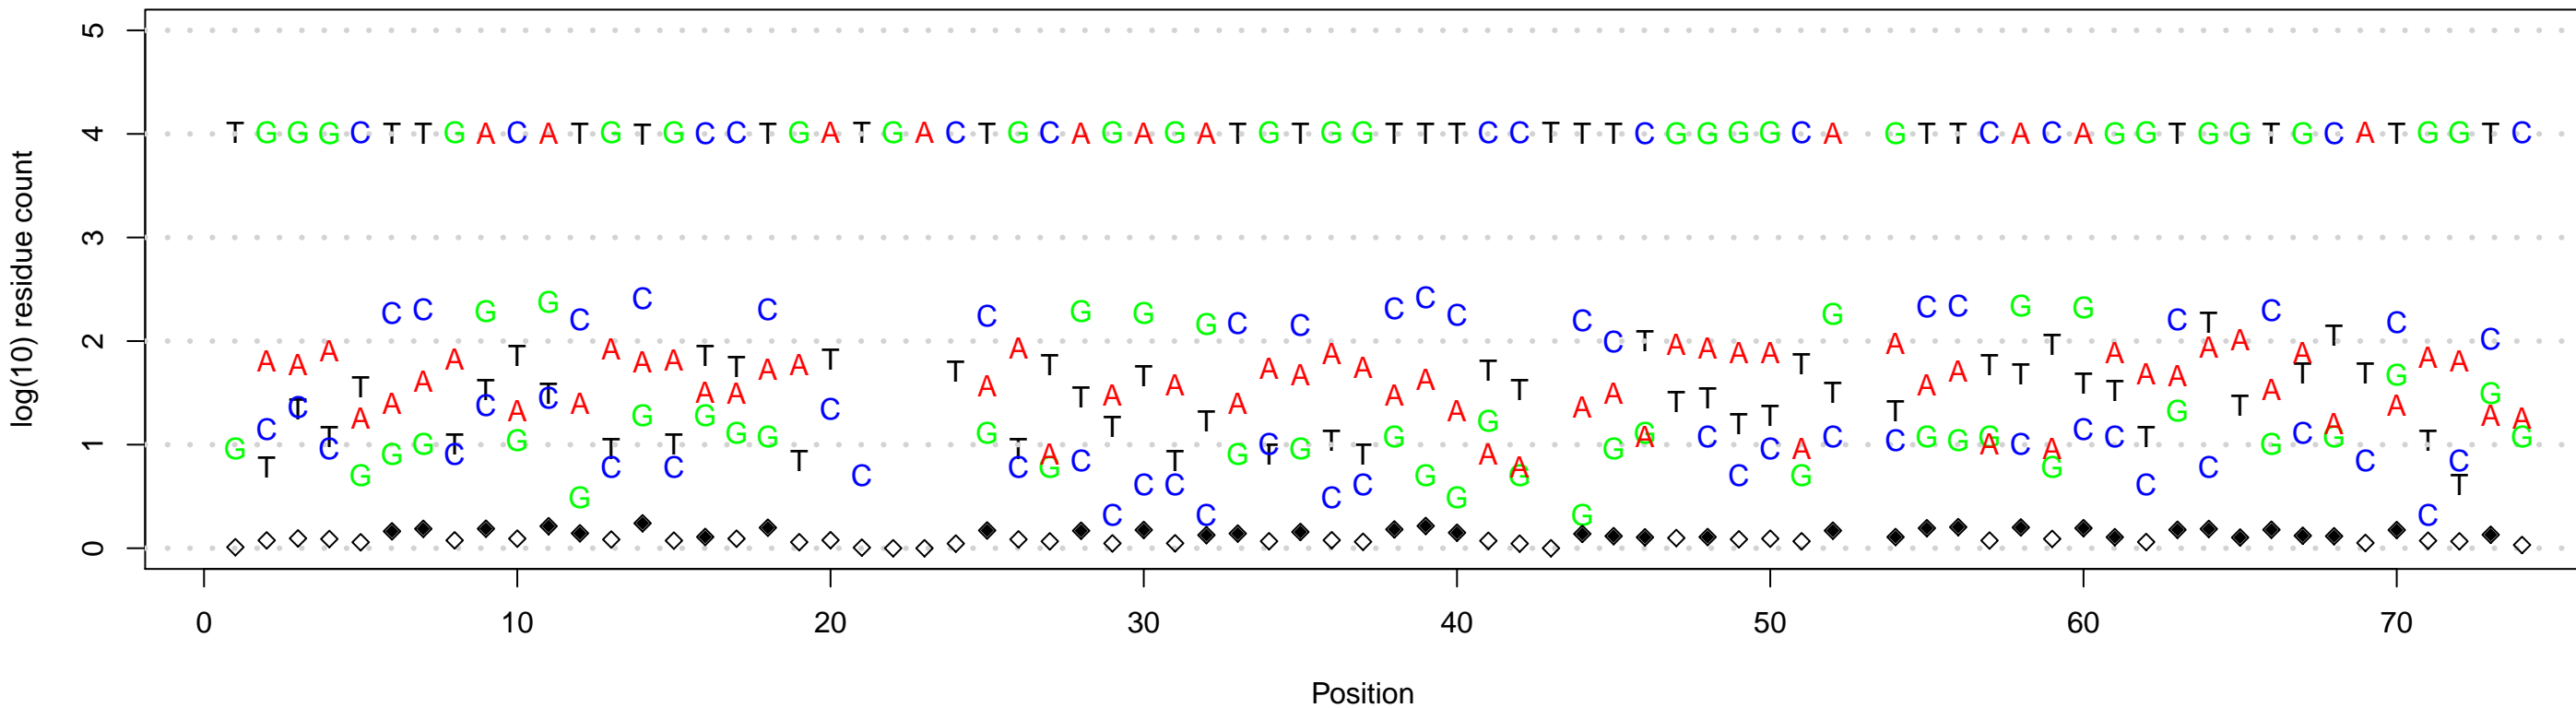

Supplement: pone.0015406.s001.pdf [file pone.0015406.s001.pdf]
