# Supplementary material for: Microbiome Profiling by Illumina Sequencing of Combinatorial Sequence-Tagged PCR Products
Source: PubMed Central journal article supplement (PMC2964327; doi:10.1371/journal.pone.0015406), 2010-10-26
Supplement: pone.0015406.s005.pdf [file pone.0015406.s005.pdf]

| ID# | DGGE                            |             |          |          | Illumina  |
|-----|---------------------------------|-------------|----------|----------|-----------|
|     | Organism Detected               | Accession # | Coverage | Identity | Abundance |
| 21  | <i>L. crispatus</i>             | AY335496.1  | 100%     | 91%      | 29%       |
|     | * <i>L. iners</i>               |             |          |          | 40%       |
| 50  | * <i>G. vaginalis</i>           |             |          |          | 50%       |
| 54  | * <i>L. iners</i>               |             |          |          | 56%       |
| 63  | * <i>L. iners</i>               |             |          |          | 69%       |
| 71  | * <i>L. crispatus</i>           |             |          |          | 25%       |
|     | * <i>L. iners</i>               |             |          |          | 55%       |
| 86  | <i>L. iners</i>                 | AY283272.1  | 100%     | 98%      | 78%       |
|     | * <i>G. vaginalis</i>           |             |          |          | 11%       |
| 6   | <i>L. iners</i>                 | AY283272.1  | 100%     | 99%      | 60%       |
|     | * <i>G. vaginalis</i>           |             |          |          | 21%       |
| 18  | * <i>L. iners</i>               |             |          |          | 54%       |
|     | <i>G. vaginalis</i>             | CP001849.1  | 94%      | 100%     | 30%       |
| 49  | <i>Streptococcus anginosus</i>  | GU415393.1  | 99%      | 94%      | 28%       |
| 75  | <i>L. iners</i>                 | AY283272.1  | 96%      | 97%      | 46%       |
|     | * <i>G. vaginalis</i>           |             |          |          | 33%       |
| 92  | <i>Haemophilus haemolyticus</i> | GU561423.1  | 98%      | 100%     | 15%       |
|     | * <i>L. iners</i>               |             |          |          | 18%       |
|     | <i>G. vaginalis</i>             | EF194095.1  | 99%      | 97%      | 27%       |
| 40  | <i>Leptotrichia amnionii</i>    | EF218612.1  | 99%      | 98%      | 15%       |
|     | * <i>L. iners</i>               |             |          |          | 18%       |
|     | <i>G. vaginalis</i>             | EF194095.1  | 100%     | 95%      | 23%       |
| 48  | * <i>L. crispatus</i>           |             |          |          | 13%       |
|     | * <i>L. iners</i>               |             |          |          | 22%       |
|     | <i>G. vaginalis</i>             | CP001849.1  | 99%      | 97%      | 29%       |
| 57  | <i>L. iners</i>                 | AY283272.1  | 99%      | 98%      | 55%       |
|     | <i>L. iners</i>                 | AY283272.1  | 99%      | 98%      | 55%       |
|     | <i>G. vaginalis</i>             | EF194095.1  | 99%      | 97%      | 20%       |
| 60  | <i>G. vaginalis</i>             | CP001849.1  | 98%      | 95%      | 24%       |
| 67  | <i>Streptococcus agalactiae</i> | AB297817.1  | 100%     | 97%      | 27%       |
|     | <i>G. vaginalis</i>             | EF194095.1  | 99%      | 97%      | 54%       |
| 73  | <i>Leptotrichia amnionii</i>    | EF218612.1  | 100%     | 95%      | 2%        |
|     | <i>G. vaginalis</i>             | EF194095.1  | 97%      | 98%      | 34%       |
| 83  | <i>G. vaginalis</i>             | CP001849.1  | 100%     | 96%      | 23%       |
| 89  | <i>Prevotella amniotica</i>     | AM422125.1  | 100%     | 91%      | 2%        |
|     | * <i>L. iners</i>               |             |          |          | 19%       |
|     | * <i>G. vaginalis</i>           |             |          |          | 42%       |
| 90  | <i>G. vaginalis</i>             | CP001849.1  | 100%     | 97%      | 60%       |

\*Determined via band location on DGGE gel
